# Supplementary material for: Prognostic significance of platelet-to-lymphocyte ratio (PLR) in patients with breast cancer treated with neoadjuvant chemotherapy: a meta-analysis
Source: PubMed Central journal article supplement — BMJ Open. 2023 Nov 23;13(11):e074874. doi: 10.1136/bmjopen-2023-074874 (PMC10668253; doi:10.1136/bmjopen-2023-074874), 2023-11-23
Supplement: bmjopen-2023-074874.draft_revisions.pdf [file bmjopen-2023-074874.draft_revisions.pdf]

# BMJ Open

BMJ Open is committed to open peer review. As part of this commitment we make the peer review history of every article we publish publicly available.

When an article is published we post the peer reviewers' comments and the authors' responses online. We also post the versions of the paper that were used during peer review. These are the versions that the peer review comments apply to.

The versions of the paper that follow are the versions that were submitted during the peer review process. They are not the versions of record or the final published versions. They should not be cited or distributed as the published version of this manuscript.

BMJ Open is an open access journal and the full, final, typeset and author-corrected version of record of the manuscript is available on our site with no access controls, subscription charges or pay-per-view fees (<http://bmjopen.bmj.com>).

If you have any questions on BMJ Open's open peer review process please email [info.bmjopen@bmj.com](mailto:info.bmjopen@bmj.com)

# BMJ Open

## Prognostic Significance of Platelet-Lymphocyte Ratio (PLR) in Breast Cancer Patients Treated with Neoadjuvant Chemotherapy: A Meta-analysis

|                               |                                                                                                                                                                                                                                                                                                                                                                                                                                                                                                                                                                                                                                                                                                                                                                      |
|-------------------------------|----------------------------------------------------------------------------------------------------------------------------------------------------------------------------------------------------------------------------------------------------------------------------------------------------------------------------------------------------------------------------------------------------------------------------------------------------------------------------------------------------------------------------------------------------------------------------------------------------------------------------------------------------------------------------------------------------------------------------------------------------------------------|
| Journal:                      | <i>BMJ Open</i>                                                                                                                                                                                                                                                                                                                                                                                                                                                                                                                                                                                                                                                                                                                                                      |
| Manuscript ID                 | bmjopen-2023-074874                                                                                                                                                                                                                                                                                                                                                                                                                                                                                                                                                                                                                                                                                                                                                  |
| Article Type:                 | Original research                                                                                                                                                                                                                                                                                                                                                                                                                                                                                                                                                                                                                                                                                                                                                    |
| Date Submitted by the Author: | 20-Apr-2023                                                                                                                                                                                                                                                                                                                                                                                                                                                                                                                                                                                                                                                                                                                                                          |
| Complete List of Authors:     | <p>Qi, Xue; Nantong Liangchun Hospital of Traditional Chinese Medicine, Department of Oncology</p> <p>Chen, Jia; Affiliated Tumor Hospital of Nantong University, Department of Oncology</p> <p>Wei, Sheng; Affiliated Tumor Hospital of Nantong University, Department of Radiotherapy</p> <p>Ni, Jingyi; Affiliated Tumor Hospital of Nantong University, Department of Oncology</p> <p>Song, Li; Affiliated Tumor Hospital of Nantong University, Department of Oncology</p> <p>Jin, Conghui; Affiliated Tumor Hospital of Nantong University, Department of Oncology</p> <p>Yang, Lei; Affiliated Tumor Hospital of Nantong University, Department of Oncology</p> <p>Zhang, Xunlei; Affiliated Tumor Hospital of Nantong University, Department of Oncology</p> |
| Keywords:                     | ONCOLOGY, Breast tumours < ONCOLOGY, Prognosis                                                                                                                                                                                                                                                                                                                                                                                                                                                                                                                                                                                                                                                                                                                       |
|                               |                                                                                                                                                                                                                                                                                                                                                                                                                                                                                                                                                                                                                                                                                                                                                                      |

SCHOLARONE™  
Manuscripts

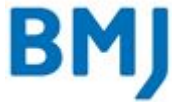

I, the Submitting Author has the right to grant and does grant on behalf of all authors of the Work (as defined in the below author licence), an exclusive licence and/or a non-exclusive licence for contributions from authors who are: i) UK Crown employees; ii) where BMJ has agreed a CC-BY licence shall apply, and/or iii) in accordance with the terms applicable for US Federal Government officers or employees acting as part of their official duties; on a worldwide, perpetual, irrevocable, royalty-free basis to BMJ Publishing Group Ltd ("BMJ") its licensees and where the relevant Journal is co-owned by BMJ to the co-owners of the Journal, to publish the Work in this journal and any other BMJ products and to exploit all rights, as set out in our [licence](#).

The Submitting Author accepts and understands that any supply made under these terms is made by BMJ to the Submitting Author unless you are acting as an employee on behalf of your employer or a postgraduate student of an affiliated institution which is paying any applicable article publishing charge ("APC") for Open Access articles. Where the Submitting Author wishes to make the Work available on an Open Access basis (and intends to pay the relevant APC), the terms of reuse of such Open Access shall be governed by a Creative Commons licence – details of these licences and which [Creative Commons](#) licence will apply to this Work are set out in our licence referred to above.

Other than as permitted in any relevant BMJ Author's Self Archiving Policies, I confirm this Work has not been accepted for publication elsewhere, is not being considered for publication elsewhere and does not duplicate material already published. I confirm all authors consent to publication of this Work and authorise the granting of this licence.

1  
2  
3  
4 **Prognostic Significance of Platelet-Lymphocyte Ratio (PLR)**  
5  
6 **in Breast Cancer Patients Treated with Neoadjuvant**  
7  
8 **Chemotherapy: A Meta-analysis**  
9  
10

11 **Xue Qi<sup>1,\*</sup>, Jia Chen<sup>2,\*</sup>, Sheng Wei<sup>3,\*</sup>, Jingyi Ni<sup>2</sup>, Li Song<sup>2</sup>, Conghui**  
12  
13 **Jin<sup>2</sup>, Lei Yang<sup>2,#</sup>, Xunlei Zhang<sup>2,#</sup>**  
14  
15

16 1. Department of Oncology, Nantong Liangchun Hospital of Traditional Chinese  
17 Medicine, Nantong Jiangsu 226300, China;

18 2. Department of Oncology, Tumor Hospital Affiliated to Nantong University,  
19 Nantong Jiangsu 226300, China;

20 3. Department of Radiotherapy, Tumor Hospital Affiliated to Nantong University,  
21 Nantong Jiangsu 226300, China;

22  
23  
24  
25  
26  
27  
28 **\* These authors contributed equally to this work**  
29

30  
31  
32 **# Correspondence Authors:**  
33

34 1. Xunlei Zhang, Department of Oncology, Tumor Hospital Affiliated to Nantong  
35 University, Nantong Jiangsu 226300, China; Tel/fax +86 513 8672 9169; E-mail:  
36 477750911@qq.com  
37

38 2. Lei Yang, Department of Oncology, Tumor Hospital Affiliated to Nantong  
39 University, Nantong Jiangsu 226300, China; Tel/fax +86 513 8672 8238; E-mail:  
40 leiyang.53@163.com  
41  
42  
43  
44  
45  
46  
47  
48  
49  
50  
51  
52  
53  
54  
55  
56  
57  
58  
59  
60

## Abstract

**Objective:** PLR (platelet-lymphocyte ratio), known as a key systemic inflammatory parameter, have been proved to be associated with response to neoadjuvant therapy in breast cancer (BC); however, the results remain controversial. This meta-analysis was carried out to evaluate the prognostic values of PLR in breast cancer patients treated with neoadjuvant chemotherapy.

**Design:** Meta-analysis.

**Data sources:** Relevant literature published on the following databases: PubMed, Embase, Web of Science databases and the Cochrane Library.

**Eligibility criteria:** All studies involving patients with breast cancer treated with NACT and peripheral blood pretreatment PLR recorded were included.

**Data extraction and synthesis:** Two researchers independently extracted and evaluated hazard ratio (HR) /Odds Ratio (OR) and its 95% confidence (CI) of survival outcomes, pCR rate and clinicopathological parameters.

**Results:** A total of 22 studies with 5533 breast cancer patients treated with neoadjuvant chemotherapy were enrolled in the final meta-analysis. Our results demonstrate that elevated PLR value appears to correlate with low pCR rate (HR: 0.77, 95% CI: 0.67-0.88,  $p < 0.001$ ,  $I^2=75.80\%$ ,  $P_h < 0.001$ ) and poor prognosis, including OS (HR: 1.90, 95% CI: 1.39-2.59,  $p < 0.001$ ;  $I^2= 7.40\%$ ,  $P_h = 0.365$ ) and DFS (HR: 1.97, 95% CI: 1.56-2.50,  $p < 0.001$ ;  $I^2= 0.0\%$ ,  $P_h = 0.460$ ). Furthermore, PLR level was associated with age (OR: 0.86, 95% CI: 0.79-0.93,  $p < 0.001$ ,  $I^2= 40.60\%$ ,  $P_h = 0.096$ ), menopausal status (OR: 0.83, 95% CI: 0.76-0.90,  $p < 0.001$ ,  $I^2= 50.80\%$ ,  $P_h = 0.087$ ) and T stage (OR: 1.05, 95% CI: 1.00-1.11,  $p = 0.035$ ;  $I^2= 70.30\%$ ,  $P_h = 0.005$ ) of breast cancer patients.

**Conclusions:** This meta-analysis demonstrated that high PLR was significantly related to the low pCR rate, poor OS and PFS of breast cancer patients treated with neoadjuvant chemotherapy. Therefore, PLR can be used as a potential predictor biomarker for the efficacy of neoadjuvant chemotherapy in breast cancer.

## Strengths and limitations of this study

1. This is the first meta-analysis to assess the role of platelet-lymphocyte ratio (PLR) in predicting pCR rate and survival in BC patients treated with NACT.
2. Scientific and reliable statistical methods were applied.
3. The results of this study showed that PLR could be a potential predictor biomarker for the efficacy of neoadjuvant chemotherapy and provided a strategy for further large-sample prospectively randomised controlled studies.
4. All the studies included in this meta-analysis were retrospective and lacked detailed clinicopathological information, which may lead to bias of our results.

## Keywords

Platelet, Lymphocyte, PLR, Breast Cancer, Neoadjuvant Chemotherapy, Meta-Analysis

**Word count: 3879**

## Introduction

Breast cancer (BC) is the most frequently diagnosed malignant neoplasm in women worldwide <sup>1</sup>. BC patients in China account for 12.2% of the total number of newly diagnosed and 9.6% of all breast cancer related deaths in the world <sup>2</sup>. About 20-25% of patients are diagnosed with locally advanced breast cancer, which prone to recurrence and metastasis after surgery without any Preoperative treatment <sup>3 4</sup>. Survival rates for BC patients have increased dramatically due to the development of treatment strategies, such as individualized treatment plans made by multidisciplinary teams, including surgical, radiation and medical oncology <sup>5</sup>. At present, neoadjuvant chemotherapy (NACT) has become the standard and effective treatment for patients with locally advanced breast cancer <sup>6</sup>. The aim of NACT is mainly to reduce tumor size and the stage of tumors, improve tumor operability, and improve the success rates of breast conservative operation <sup>7-9</sup>. Additionally, the effects of NACT could provide information to assessing the efficacy of chemotherapy during the treatment <sup>10</sup>. However, not all patients receiving neoadjuvant therapy can achieve therapeutic effect, especially pathologic complete response (pCR). Previous studies showed that the pCR rate of NACT in HER2 (+) patients was about 30%, 30-50% in triple negative breast cancer and less than 10% in ER (+) and HER2 (-) breast cancer patients <sup>11-13</sup>. The reasons may be different pathological types, ER status, HER-2 status, disease stage, and other factors. Some gene mutations, such as PIK3CA, TP53, SIRT5 and CDKN2A, have been proved to be associated with poor response to NACT in breast cancer patients <sup>14</sup>. However, these above biomarkers are expensive and difficult to obtain. Hence, it's necessary to find a convenient, inexpensive and reliable marker, which can predict response after NACT.

It is well recognized that the systemic inflammatory response plays an essential role in breast cancer progression and development <sup>15 16</sup>. Numerous studies have shown that inflammatory biomarkers such as neutrophil-to-lymphocyte ratio (NLR), platelet-to-lymphocyte ratio (PLR) and systemic immune-inflammation index (SII), are associated with chemosensitivity and prognosis for different malignancies <sup>17-21</sup>.

1  
2  
3  
4 PLR, as one of the most commonly used markers, was proved to be an convenient and  
5 cost-effective blood-derived prognostic marker to evaluate the prognosis of breast  
6 cancer. Elevated PLR has been linked with poor prognosis for breast cancer in  
7 previous studies<sup>22-24</sup>. Furthermore, some research found that a higher PLR may lead  
8 to a worse response to NACT for breast cancer patients<sup>25 26</sup>. However, some other  
9 studies showed that the BC patients with higher PLR may achieve more pCR rate  
10 after NACT<sup>27 28</sup>. Thus, the role of PLR as a predictor for outcomes in BC patients  
11 after NACT is still not clear. This meta-analysis is aimed to explore the predictive  
12 value of PLR in patients with breast cancer treated with NACT.  
13  
14  
15  
16  
17  
18  
19  
20

## 21 **Materials and Methods**

### 22 **Literature search**

23  
24 A systematic literature search was conducted based on the following databases:  
25 PubMed, Embase, Web of Science databases and the Cochrane Library. The  
26 keywords for the search strategy are as follows: (“PLR” or “platelet lymphocyte ratio”  
27 or “platelet-to-lymphocyte ratio” or “platelet-lymphocyte ratio”) and (“breast cancer”,  
28 “breast tumor”, “breast carcinoma”, “breast neoplasms”, “mammary cancer”) and  
29 (“neoadjuvant chemotherapy”, “preoperative chemotherapy”, “preoperative systemic  
30 treatment”, “pre-surgical treatment”, “primary chemotherapy”). The last search was  
31 updated to Dec 31, 2022, and all the articles were limited to English-language. We  
32 also used a hand search for the reference list of the retrieved articles in order to  
33 identify additional studies. The selection process of the meta-analysis is shown in  
34 Figure 1. This study was conducted according to the Preferred Reporting Items for  
35 Systematic Reviews and Meta-Analyses (PRISMA) statement. No patient consent and  
36 ethical approval were required in this study.  
37  
38  
39  
40  
41  
42  
43  
44  
45  
46  
47  
48  
49  
50

### 51 **Inclusion and exclusion criteria**

52  
53 The studies included in the analysis had to meet the following criteria: (1) breast  
54 cancer patients received neoadjuvant treatment and surgery; (2) studies with the  
55 peripheral blood pretreatment PLR values; (3) studies with pathologic response status  
56 or survival outcomes post neoadjuvant treatment, including pCR, disease-free survival  
57  
58  
59  
60



(DFS), overall survival (OS), OR and HR with 95% confidence intervals (CI). The exclusion criteria were as follows: (1) Abstracts, reviews, case studies, letters, non-human subject studies and not English-language studies; (2) breast cancer participants did not receive neoadjuvant treatment; (3) studies with no sufficient data.

### **Data extraction and quality assessment**

Two researchers independently reviewed the available literature and extracted data as follows: (1) study details: first author, country, publication year, study design, study period, sample size, median age, outcomes, follow-up time; (2) clinicopathologic parameters: subtype of BC, cut-off value, cut-off method, numbers in high and low PLR groups stratified by age, histologic type, tumor grade, T stage, lymph node metastasis, ki-67 value, hormone receptor status, HER-2 status, molecular subtype, menopausal status; (3) treatment outcomes: numbers in pCR and non-pCR groups, HR with 95% CIs of DFS and OS.

We used the Newcastle Ottawa Scale (NOS) rating scale to assess the quality of the included studies. The studies was scored from 0 to 9 points, based on the object selection, comparability, outcome, and exposure. High-quality literature should have a score of  $\geq 6$ . If the two researchers had disagreement, a third researcher was invited to achieve a consistent result.

### **Statistical analysis**

All analyses were performed using Stata software version 12.0 (Stata Corporation, College Station, TX, USA), using two-sided P values. Odds ratio (OR) with corresponding 95% CI was used to evaluate the association between PLR and pCR rate, clinicopathological characteristics. Hazard ratios (HR) with corresponding 95% CI was used as an effect measure to assess the relationship between PLR and DFS, OS. Then the log OR, log HR, and corresponding standard error (SE) were used to compute pooled effect measures. Moreover, stratified analyses were also performed based on ethnicity, cut-off value, cut-off method and sub-type of breast cancer. Both the Cochran's Q statistic and the  $I^2$  statistic were calculated to estimate heterogeneity among the included studies<sup>29 30</sup>. If the P value of the Q test was  $< 0.10$  or  $I^2 > 50\%$ , indicating significant heterogeneity across studies, the pooled OR and HR were

1  
2  
3  
4 calculated by the random effects model (the DerSimonian and Laird method) <sup>31</sup>.  
5  
6 Otherwise, fixed effects model (the Mantel–Haenszel method) was used <sup>31</sup>.  
7  
8 Publication bias was evaluated using Funnel plots and Egger’s linear regression test.  
9  
10 Sensitivity analyses were performed by omitting each single study to show the  
11  
12 influence of the individual data set to the pooled results.  $P < 0.05$  was considered  
13  
14 statistically significant.

## 15 **Results**

### 16 **Study characteristics**

17  
18  
19 As shown in the flow diagram (Figure S1), 176 research articles were identified  
20  
21 in the preliminary search. After reviewing the titles, abstracts and full texts, 154  
22  
23 studies were excluded according to the search criteria and 22 studies were finally  
24  
25 included in the meta-analysis <sup>22 25-28 32-48</sup>. The main characteristics of the included  
26  
27 studies are summarized in Table 1. The 22 enrolled studies containing 5533 BC  
28  
29 patients were published between 2016 and 2022 with the sample size ranging from 55  
30  
31 to 980. 11 studies were carried out in Asian countries (China and Japan) and the other  
32  
33 11 studies were conducted in Caucasian countries (Turkey, America, Spain, Italy,  
34  
35 France and Morocco). All studies were retrospective, with study period ranging from  
36  
37 1996 – 2022. The follow-up time ranged from 3.4 to 124.8 months in these studies,  
38  
39 with NOS scores of 6 – 8 points. Most of the study subjects embraced all breast  
40  
41 cancer types, also including two inflammatory breast cancer studies, two triple  
42  
43 negative breast cancer studies and one Luminal B breast cancer study. All patients  
44  
45 received standardized neoadjuvant chemotherapy and surgery, with the median age  
46  
47 ranged from 45 to 71 years old. Cut-off values for PLR were provided in 21 studies, 6  
48  
49 of which were derived from previous studies and another 15 were obtained from ROC  
50  
51 curves.

### 52 **Association between PLR and pCR of BC**

53  
54  
55 19 studies with 4301 patients reported the correlation between the PLR and pCR  
56  
57 <sup>22 26 28 32-41 43 44 46-49</sup>. Our results indicate that high PLR level was significantly  
58  
59 associated with low pCR rate (HR: 0.77, 95% CI: 0.67-0.88,  $p < 0.001$ ), and  
60

1  
2  
3  
4 significant heterogeneity was observed ( $I^2=75.80\%$ ,  $P_h < 0.001$ , Table 2, Figure 1).  
5  
6 When stratified analyses were performed based on ethnicity, the results showed that  
7  
8 Caucasian studies were still statistically significant (HR: 0.77, 95% CI: 0.68-0.88,  $p < 0.001$ ;  
9  
10  $I^2=61.60\%$ ,  $P_h = 0.004$ ). On the other hand, there was no statistically  
11  
12 significance observed for PLR and pCR among the Asian studies (HR: 0.83, 95% CI:  
13  
14 0.58-1.17,  $p = 0.288$ ;  $I^2= 85.00\%$ ,  $P_h < 0.001$ ). Subgroup analysis were also performed  
15  
16 to determine the effects of cut-off values and methods on the outcomes. Studies with  
17  
18 cut-off value  $\geq 150$  showed a significant association between the PLR and pCR (HR:  
19  
20 0.78, 95% CI: 0.67-0.91,  $p = 0.001$ ;  $I^2= 68.20\%$ ,  $P_h = 0.001$ ), while cut-off values  
21  
22  $< 150$  did not achieve statistical significance (HR: 0.80, 95% CI: 0.59-1.10,  $p = 0.172$ ;  
23  
24  $I^2= 82.90\%$ ,  $P_h < 0.001$ ). On the other hand, we observed statistically significant  
25  
26 relationship between PLR and pCR, no matter the cut-off values obtained from ROC  
27  
28 curves (HR: 0.72, 95% CI: 0.57-0.92,  $p = 0.008$ ;  $I^2= 81.10\%$ ,  $P_h < 0.001$ ) or previous  
29  
30 studies (HR: 0.86, 95% CI: 0.78-0.94,  $p = 0.001$ ;  $I^2= 39.30\%$ ,  $P_h = 0.144$ ). Further  
31  
32 subgroup analysis was also conducted by tumor subtypes. In the all types group (HR:  
33  
34 0.76, 95% CI: 0.64-0.89,  $p = 0.001$ ;  $I^2= 74.00\%$ ,  $P_h < 0.001$ ) and inflammatory breast  
35  
36 cancer group (HR: 0.83, 95% CI: 0.70-0.97,  $p = 0.021$ ;  $I^2= 0.00\%$ ,  $P_h = 0.368$ ),  
37  
38 statistical significance were noted between PLR and pCR. In comparison, studies in  
39  
40 the triple negative breast cancer group did not show a significant association (HR:  
41  
42 0.91, 95% CI: 0.26-3.21,  $p = 0.885$ ;  $I^2= 94.70\%$ ,  $P_h < 0.001$ ).

#### 43 **Association between PLR and survival of BC**

44  
45 5 studies with 912 patients evaluated the relationship between OS and PLR<sup>25 35</sup>  
46  
47 <sup>40-42</sup>. The pooled results demonstrated that high PLR was significantly associated with  
48  
49 poor OS in patients with breast cancer (HR: 1.90, 95% CI: 1.39-2.59,  $p < 0.001$ ;  $I^2=$   
50  
51  $7.40\%$ ,  $P_h = 0.365$ ) (Table 3, Figure S2). Subgroup analyses by ethnicity showed that  
52  
53 PLR had significantly prognostic value for OS both in Asian and Caucasian  
54  
55 populations (HR: 2.00, 95% CI: 1.19-3.38,  $p = 0.009$ ,  $I^2= 56.70\%$ ,  $P_h = 0.128$ ; HR:  
56  
57 1.85, 95% CI: 1.26-2.71,  $p = 0.002$ ,  $I^2= 0.0\%$ ,  $P_h = 0.378$ ). Moreover, when stratified  
58  
59 by subtypes of breast cancer, the results indicated that the prognostic effect of PLR on  
60  
OS was similarly significant among the all types group (HR: 1.92, 95% CI: 1.31-2.83,

1  
2  
3  
4  $p = 0.001$ ;  $I^2 = 15.30\%$ ,  $P_h = 0.307$ ) and inflammatory breast cancer group (HR: 1.86,  
5  
6 95% CI: 1.11-3.11,  $p = 0.018$ ;  $I^2 = 48.60\%$ ,  $P_h = 0.163$ ). Furthermore, when  
7  
8 considering different cut-off value methods, high PLR significantly predicted shorter  
9  
10 OS when cut-off values were conducted by ROC (HR: 2.15, 95% CI: 1.44-3.22,  $p <$   
11  
12  $0.001$ ;  $I^2 = 19.80\%$ ,  $P_h = 0.288$ ), but did not show significantly prognostic efficiency in  
13  
14 the group of cut-off value obtained from previous studies (HR: 1.58, 95% CI:  
15  
16  $0.97-2.56$ ,  $p = 0.065$ ;  $I^2 = 0.0\%$ ,  $P_h = 0.345$ ).

17  
18 7 studies with 1887 patients analyzed the relationship between the PLR and DFS  
19  
20 <sup>25 26 35 37 38 41 45</sup>. The pooled results indicated that DFS was significantly shorter in high  
21  
22 PLR group than in low PLR group (HR: 1.97, 95% CI: 1.56-2.50,  $p < 0.001$ ;  $I^2 =$   
23  
24  $0.0\%$ ,  $P_h = 0.460$ ) (Table 3, Figure S3). We also performed further subgroup analysis  
25  
26 based on ethnicity, subtypes of BC and cut-off value methods. Compared with the  
27  
28 overall results, no significant changes were identified after stratification, and no  
29  
30 significant heterogeneity was observed.

### 31 **Association between PLR and clinicopathological parameters of BC**

32  
33 To analyze the impact of PLR on the clinicopathological characteristics in breast  
34  
35 cancer patients, we pooled the results from included studies according to age,  
36  
37 histologic type, tumor grade, T stage, lymph node metastasis, ki-67 value, hormone  
38  
39 receptor status, HER-2 status, molecular subtype, menopausal status. As shown in  
40  
41 Table S1, young patients and pre-menopausal status patients had significantly higher  
42  
43 PLR value than old or post-menopausal status patients (OR: 0.86, 95% CI: 0.79-0.93,  
44  
45  $p < 0.001$ ,  $I^2 = 40.60\%$ ,  $P_h = 0.096$ ; OR: 0.83, 95% CI: 0.76-0.90,  $p < 0.001$ ,  $I^2 =$   
46  
47  $50.80\%$ ,  $P_h = 0.087$ ). In comparison to low PLR groups, the high PLR groups had a  
48  
49 higher T stage (OR: 1.05, 95% CI: 1.00-1.11,  $p = 0.035$ ;  $I^2 = 70.30\%$ ,  $P_h = 0.005$ ).  
50  
51 Whereas the other results indicated no significant association of PLR with histologic  
52  
53 type, tumor grade, lymph node metastasis, ki-67 value, hormone receptor status,  
54  
55 HER-2 status and molecular subtype.

### 56 **Sensitivity analysis**

57  
58 According to the sensitivity analysis, the pooled ORs were not altered materially  
59  
60 when deleted a single study each time. All the included studies were near the central

1  
2  
3  
4 line with no clear deviation, suggesting that our results were statistically robust  
5 (Figure 2A).  
6

### 7 **Publication bias**

8  
9 Begg's funnel plot and Egger's test were used to evaluate the publication bias of  
10 the literature. The funnel plots did not reveal obvious evidence of asymmetry (Figure  
11 2B). Then, the Egger's test still did not show any significant statistical evidence of  
12 publication bias ( $P = 0.862$ ).  
13  
14  
15  
16

### 17 **Discussion**

18  
19 This meta-analysis assessed the association between pretreatment PLR with pCR  
20 and survival on 5533 breast cancer patients treated with neoadjuvant chemotherapy.  
21 Our results demonstrate that elevated PLR value appears to correlate with low pCR  
22 rate and poor prognosis, including OS and DFS. Consistent with previous studies, our  
23 findings suggest that PLR could be a significant prognostic marker for breast cancer  
24 patients who received NACT<sup>26 35 37 40 41</sup>.  
25  
26  
27  
28  
29  
30

31 Neoadjuvant chemotherapy is increasingly used to treat locally advanced breast  
32 cancer, so as to reduce the size of tumors and increase the possibility of  
33 breast-conserving surgery<sup>50</sup>. However, there are no ready-made and reliable  
34 biomarkers to predict the response to NACT. In recent years, many studies have  
35 focused on the relationship between inflammation related biomarkers and tumors.  
36 These studies showed that tumor related inflammation, which may contribute to the  
37 tumor growth, invasion and metastasis, was associated with the occurrence,  
38 development, and prognosis of cancers<sup>51 52</sup>. Common components in peripheral  
39 blood, such as neutrophils, monocytes, platelets, and lymphocytes, are closely related  
40 to the biological behavior of tumor cells<sup>53</sup>. Numerous studies have shown that  
41 lymphocytes can inhibit tumor progression and metastasis, which play an important  
42 role in tumor immune monitoring<sup>54 55</sup>. Lymphopenia is commonly seen in immune  
43 system defects caused by tumor cells. The possible mechanism is that lymphocytes  
44 can control growth of tumor cells through cytotoxicity and induction tumor cell  
45 apoptosis<sup>56</sup>. Another research showed that lymphocytes could inhibit tumor cell  
46  
47  
48  
49  
50  
51  
52  
53  
54  
55  
56  
57  
58  
59  
60

1  
2  
3  
4 growth by secreting interferon-gamma and tumor necrosis factor- $\alpha$  <sup>57</sup>. Some studies  
5 have found that more tumor infiltrating lymphocyte is associated with better  
6 prognosis of breast cancer patients <sup>58 59</sup>. In addition, previous studies reported that  
7 tumor infiltrating lymphocyte could be a predictor for the response to neoadjuvant and  
8 adjuvant chemotherapy of breast cancer patients <sup>60 61</sup>. On the other hand, platelets, as  
9 key substances in the process of inflammation, plays an important role in tumor  
10 progression. Firstly, platelets could protect tumor cells in peripheral blood from high  
11 flow shear stress and immune attacks by aggregating and adhering to tumor cells <sup>62</sup>.  
12 Secondly, platelets could contribute tumor progression by secreting various cell  
13 growth factors, which could stimulate tumor angiogenesis and growth <sup>63-65</sup>. Thirdly,  
14 platelets could induce epithelial mesenchymal transition and impede cell-mediated  
15 immune clearance effects, leading to the tumor cell metastasis <sup>66</sup>. Therefore, high  
16 platelet count may be associated with poor prognosis of breast cancer patients.

17  
18  
19  
20  
21  
22  
23  
24  
25  
26  
27  
28  
29 Platelet-to-lymphocyte ratio (PLR) , as a commonly used indicator of  
30 inflammatory status, could predict the prognosis of variant tumors. Elevated value of  
31 PLR, with a high platelet count and/or low lymphocyte count, often lead to a low  
32 antitumor activity and poor prognosis. Previous studies showed that PLR is  
33 significantly related to the survival of colorectal cancer, gastric cancer and liver  
34 cancer <sup>67-69</sup>. Gunduz et al. showed that elevated PLR value was associated with poor  
35 DFS in breast cancer <sup>70</sup>. However, Ulas et al. reported that there is no association  
36 between PLR and DFS or OS in breast cancer <sup>71</sup>. What's more, when subgroup  
37 analysis by different molecular types of breast cancer, Koh et al. demonstrated that  
38 elevated PLR could result in an increased risk of mortality in ER+ and HER2+ group  
39 but not in ER- and HER2+ group <sup>72</sup>. Studies focused on the relationship between PLR  
40 and metastatic breast cancer could achieve positive results easily <sup>73</sup>. However, the  
41 predictive efficacy of PLR in early stage breast cancer was limited. The possible  
42 explanation is that inflammatory reaction may not be so obvious in early breast  
43 cancer. Recently, many studies have be devoted to explore whether PLR could be a  
44 predictor for locally advanced breast cancer treated with neoadjuvant chemotherapy.  
45 Tekyol et al. found that PLR value was associated with chemotherapy sensitivity and  
46  
47  
48  
49  
50  
51  
52  
53  
54  
55  
56  
57  
58  
59  
60



1  
2  
3  
4 could serve as a predictive marker of the therapeutic effect of NACT in breast cancer  
5  
6 <sup>34</sup>. Similarly, Ouissam showed that PLR was associated with OS and DFS in breast  
7  
8 cancer treated with NACT <sup>41</sup>. However, some other studies reported that the PLR  
9  
10 value has no significant predictive effect on pCR rate, DFS or OS in breast cancer  
11  
12 treated with NACT <sup>25 42</sup>. So far, the above studies indicated that the prognostic role  
13  
14 and clinical value of PLR in locally advanced breast cancer with NACT is still  
15  
16 controversial.

17  
18 We conducted this meta-analysis to explore the predictive value of PLR in breast  
19  
20 cancer patients treated with NACT. Our results indicate that high PLR level was  
21  
22 significantly associated with low pCR rate (HR: 0.77, 95% CI: 0.67-0.88,  $p < 0.001$ ).  
23  
24 This finding is consistent with previous studies confirming that PLR may act as a  
25  
26 significant marker for predicting the effective of NACT in BC patients <sup>33 34 37</sup>. In  
27  
28 subgroup analysis, we found that PLR was only significantly associated with  
29  
30 Caucasian patients but not Asian patients. The possible explanations were the  
31  
32 differences in baseline PLR values due to different genetic backgrounds, different  
33  
34 chemotherapy regimens and doses. What's more, the heterogeneity of the Asian group  
35  
36 is also more obvious than that of the Caucasian group, which may lead to no  
37  
38 significance in the Asian group. Previous studies reported that high PLR value may  
39  
40 indicate a lower pCR rate and poor prognosis of TNBC patients <sup>46</sup>. Subgroup analysis  
41  
42 by tumor subtypes in this meta-analysis including two studies showed no significant  
43  
44 association between PLR and pCR in the triple negative breast cancer group. Further  
45  
46 more research is needed to evaluate the predictive value of PLR in TNBC treated with  
47  
48 NACT. How to identify the optimal critical value for the clinical application of PLR  
49  
50 may be a major concern for doctors. Unfortunately, this value has not been  
51  
52 determined for predicting the efficacy and prognosis of neoadjuvant therapy in breast  
53  
54 cancer patients. Some studies reported that high PLR was associated with poor  
55  
56 prognosis using a cut-off value of 292 and 200 <sup>74 75</sup>, while other studies did not find  
57  
58 significant association between PLR and prognosis of breast cancer patients with a  
59  
60 cut-off value of 161, 107, and 160, respectively <sup>22 37 76</sup>. Different studies use variant  
cut-off values from different methods. Traditionally, we believe that the ROC curve is

1  
2  
3  
4 the most suitable for getting the optimal cutoff value<sup>33 41 46-48</sup>. However, other studies  
5 have also achieved significant results using the cut-off values from previous studies<sup>26</sup>  
6  
7  
8  
9  
10  
11  
12  
13  
14  
15  
16  
17  
18  
19  
20  
21  
22  
23  
24  
25  
26  
27  
28  
29  
30  
31  
32  
33  
34  
35  
36  
37  
38  
39  
40  
41  
42  
43  
44  
45  
46  
47  
48  
49  
50  
51  
52  
53  
54  
55  
56  
57  
58  
59  
60

the most suitable for getting the optimal cutoff value<sup>33 41 46-48</sup>. However, other studies have also achieved significant results using the cut-off values from previous studies<sup>26</sup><sup>28 34</sup>. We performed subgroup analysis to determine the effects of cut-off values and methods on the outcomes. The results showed statistically significant relationship between PLR and pCR, no matter the cut-off values obtained from ROC curves or previous studies. This result indicated that the source and method of optimal cut-off values are not the key influence factors for PLR acting as a predictive factor for breast cancer. On the other hand, our results also showed that studies with cut-off value  $\geq 150$  showed a significant association between the PLR and pCR, while cut-off values  $< 150$  did not achieve statistical significance. Therefore, a higher cut-off value for PLR may increase its predictive value for breast cancer patients. However, a higher cut-off value may lead to the omission of a large number of patient and reduce its predictive sensitivity in clinical practice<sup>77</sup>. Therefore, further researches are needed to determine the optimal cut-off value of PLR for future individualized treatment.

We also evaluated the association between PLR and prognosis of breast cancer patients treated with NACT. Zhang et al. conducted a meta-analysis which including 5542 breast cancer patients with different stages and indicated that high PLR level is significantly associated with poor OS and DFS of breast cancer patients<sup>78</sup>. However, the results were inconsistent when evaluated the prognosis value for NACT. Christophe et al. and Jiang et al. reported that the PLR value has no significant effect on DFS or OS in breast cancer treated with NACT<sup>25 42</sup>. Contradictory results made by Ileana and Ouissam showed that PLR was associated with OS and DFS in breast cancer treated with NACT<sup>35 41</sup>. In our study, the pooled results demonstrated that high PLR was significantly associated with poor OS and PFS in patients with breast cancer. Subgroup analyses by ethnicity, method and subtype showed the same results with no significant heterogeneity. The consistency of this result may be due to the fact that the included patients are all local advanced stage patients who have received NACT. Therefore, further studies are needed to evaluate the prognostic value of PLR in different clinical stages and molecular subtypes of breast cancer. What's more, this



1  
2  
3  
4 meta-analysis also explored the association between PLR and clinicopathological  
5 characteristics. Our results indicated that high PLR level was more common in young  
6 women and patients with premenopausal status. One possible explanation is that  
7 young people may have more lymphocyte and platelet reserves and a more sensitive  
8 inflammatory state. On the other hand, we also found that elevated PLR is associated  
9 with high T stage, which indicated that PLR may involve in the occurrence and  
10 progression of breast cancer. Some exploration experiments are needed to prove the  
11 mechanisms between PLR and breast cancer.  
12  
13  
14  
15  
16  
17  
18

19 There are still several limitations to be considered in this meta-analysis. First, All  
20 of the studies included were retrospective, and some studies have incomplete data,  
21 which may have some impact on the final results. Second, the cut-off values of PLR  
22 were inconsistent among the studies, some of them determined the optimum PLR  
23 value according to the previous studies instead of using ROC curve, which may lead  
24 to the introduction of selection bias in the meta-analysis. Third, variant molecular  
25 subtypes of breast cancer respond differently to neoadjuvant therapy, and the  
26 heterogeneity of the results may be affected for the lacking of relevant information  
27 about molecular typing in most studies. Finally, PLR may be influenced by some  
28 factors, including bacterial and viral infections, nutritional state and history of  
29 medication. These intrinsic factors were not statistically available and uncontrollable,  
30 which were unavoidable sources of heterogeneity in this meta-analysis.  
31  
32  
33  
34  
35  
36  
37  
38  
39  
40  
41  
42

## 43 **Conclusions**

44  
45 This study indicated that PLR level was associated with age, menopausal status  
46 and T stage of breast cancer patients. In addition, high PLR was significantly related  
47 to the low pCR rate, poor OS and PFS of breast cancer patients treated with  
48 neoadjuvant chemotherapy. Therefore, PLR can be used as a potential predictor  
49 biomarker for the efficacy of neoadjuvant chemotherapy. However, further high  
50 quality and well-designed studies with larger samples are needed to identify the  
51 optimal cut-off value of PLR and explore the mechanism of PLR with breast cancer.  
52  
53  
54  
55  
56  
57  
58  
59  
60

## Abbreviations

HR: hazard ratio; OR: odds ratio; 95% CI: 95% confidence interval; Ph: p values of Q test for heterogeneity test; OS: overall survival; DFS: disease-free survival. PLR: platelet-lymphocyte ratio; BC: breast cancer; NACT: neoadjuvant chemotherapy; ROC: receiver operating characteristic curve; NOS: Newcastle-Ottawa Scale;

## Declarations

### Ethics approval and consent to participate

All the data supporting our findings in this paper were freely downloaded from the PubMed, EMBASE, Web of Science databases and the Cochrane Library. No ethical approval or written informed consent for participation was required.

### Consent for publication

Not applicable.

### Availability of data and materials

All data for this study are publicly available and are ready for the public to download at no cost from the official websites of the PubMed, EMBASE, Web of Science databases and the Cochrane Library. There is no need to have the formal permission to use data for this study. The sources and data robustness have been described in the section of "Methods".

### Competing interests

The authors declare that they have no competing interests.

### Funding

The work was supported by Medical Talent Program Foundation of Health and Family Planning Commission of Nantong (MA202009), Natural Science Foundation of Jiangsu Province (BK20191208).

**Author Contributions**

XQ, JC and XZ were involved in drafting the manuscript. SW and JN made contributions to the concepts, acquisition and analysis of the data. LS was involved in acquisition of data and preparing the Figs. LY and CJ designed and revised the manuscript. All authors have read and approved the final manuscript.

**Acknowledgements**

Not applicable.

## References

1. Siegel RL, Miller KD, Jemal A. Cancer statistics, 2020. *CA Cancer J Clin* 2020;70(1):7-30.
2. Fan L, Strasser-Weippl K, Li JJ, et al. Breast cancer in China. *Lancet Oncol* 2014;15(7):e279-89.
3. Wang M, Hou L, Chen M, et al. Neoadjuvant Chemotherapy Creates Surgery Opportunities For Inoperable Locally Advanced Breast Cancer. *Sci Rep* 2017;7:44673.
4. Sinacki M, Badzio A, Welnicka-Jaskiewicz M, et al. Pattern of care in locally advanced breast cancer: focus on local therapy. *Breast* 2011;20(2):145-50.
5. Kesson EM, Allardice GM, George WD, et al. Effects of multidisciplinary team working on breast cancer survival: retrospective, comparative, interventional cohort study of 13 722 women. *BMJ* 2012;344:e2718.
6. Wolmark N, Wang J, Mamounas E, et al. Preoperative chemotherapy in patients with operable breast cancer: nine-year results from National Surgical Adjuvant Breast and Bowel Project B-18. *J Natl Cancer Inst Monogr* 2001(30):96-102.
7. Nam K, Eisenbrey JR, Stanczak M, et al. Monitoring Neoadjuvant Chemotherapy for Breast Cancer by Using Three-dimensional Subharmonic Aided Pressure Estimation and Imaging with US Contrast Agents: Preliminary Experience. *Radiology* 2017;285(1):53-62.
8. Savaridas SL, Sim YT, Vinnicombe SJ, et al. Are baseline ultrasound and mammographic features associated with rates of pathological complete response in patients receiving neoadjuvant chemotherapy for breast cancer? *Cancer Imaging* 2019;19(1):67.
9. He Z, Song A, Zhang Z, et al. Comparative efficacy of non-pharmacological adjuvant therapies for quality of life in the patients with breast cancer receiving chemo- or radio-therapy: A protocol for systematic review and Bayesian network meta-analysis. *Medicine (Baltimore)* 2018;97(35):e12096.
10. Mieog JS, van der Hage JA, van de Velde CJ. Preoperative chemotherapy for women with operable breast cancer. *Cochrane Database Syst Rev* 2007;2007(2):CD005002.
11. von Minckwitz G, Untch M, Blohmer JU, et al. Definition and impact of pathologic complete response on prognosis after neoadjuvant chemotherapy in various intrinsic breast cancer subtypes. *J Clin Oncol* 2012;30(15):1796-804.
12. Gianni L, Pienkowski T, Im YH, et al. Efficacy and safety of neoadjuvant pertuzumab and trastuzumab in women with locally advanced, inflammatory, or early HER2-positive breast cancer (NeoSphere): a randomised multicentre, open-label, phase 2 trial. *Lancet Oncol* 2012;13(1):25-32.
13. Cortazar P, Zhang L, Untch M, et al. Pathological complete response and long-term clinical benefit in breast cancer: the CTNeoBC pooled analysis. *Lancet* 2014;384(9938):164-72
14. Xu W, Chen X, Deng F, et al. Predictors of Neoadjuvant Chemotherapy Response in Breast Cancer: A Review. *Onco Targets Ther* 2020;13:5887-99.
15. Andre F, Dieci MV, Dubsy P, et al. Molecular pathways: involvement of immune pathways in the therapeutic response and outcome in breast cancer. *Clin Cancer Res* 2013;19(1):28-33.
16. Bianchini G, Gianni L. The immune system and response to HER2-targeted treatment in breast cancer. *Lancet Oncol* 2014;15(2):e58-68.
17. Aziz MH, Sideras K, Aziz NA, et al. The Systemic-immune-inflammation Index Independently Predicts Survival and Recurrence in Resectable Pancreatic Cancer and its Prognostic Value Depends on Bilirubin Levels: A Retrospective Multicenter Cohort Study. *Ann Surg*

- 2019;270(1):139-46.
18. Tomita M, Shimizu T, Ayabe T, et al. Preoperative neutrophil to lymphocyte ratio as a prognostic predictor after curative resection for non-small cell lung cancer. *Anticancer Res* 2011;31(9):2995-8.
19. Ishizuka M, Nagata H, Takagi K, et al. Combination of platelet count and neutrophil to lymphocyte ratio is a useful predictor of postoperative survival in patients with colorectal cancer. *Br J Cancer* 2013;109(2):401-7.
20. Rossi L, Santoni M, Crabb SJ, et al. High neutrophil-to-lymphocyte ratio persistent during first-line chemotherapy predicts poor clinical outcome in patients with advanced urothelial cancer. *Ann Surg Oncol* 2015;22(4):1377-84.
21. Luo G, Guo M, Liu Z, et al. Blood neutrophil-lymphocyte ratio predicts survival in patients with advanced pancreatic cancer treated with chemotherapy. *Ann Surg Oncol* 2015;22(2):670-6.
22. Losada B, Guerra JA, Malon D, et al. Pretreatment neutrophil/lymphocyte, platelet/lymphocyte, lymphocyte/monocyte, and neutrophil/monocyte ratios and outcome in elderly breast cancer patients. *Clin Transl Oncol* 2019;21(7):855-63.
23. Kim HY, Kim TH, Yoon HK, et al. The Role of Neutrophil-lymphocyte Ratio and Platelet-lymphocyte Ratio in Predicting Neoadjuvant Chemotherapy Response in Breast Cancer. *J Breast Cancer* 2019;22(3):425-38.
24. Lusho S, Durando X, Mouret-Reynier MA, et al. Platelet-to-Lymphocyte Ratio Is Associated With Favorable Response to Neoadjuvant Chemotherapy in Triple Negative Breast Cancer: A Study on 120 Patients. *Front Oncol* 2021;11:678315.
25. Van Berckelaer C, Vermeiren I, Vercauteren L, et al. The Evolution and Prognostic Role of Tumour-Infiltrating Lymphocytes and Peripheral Blood-Based Biomarkers in Inflammatory Breast Cancer Patients Treated with Neoadjuvant Chemotherapy. *Cancers (Basel)* 2021;13(18)
26. Asano Y, Kashiwagi S, Onoda N, et al. Platelet-Lymphocyte Ratio as a Useful Predictor of the Therapeutic Effect of Neoadjuvant Chemotherapy in Breast Cancer. *PLoS One* 2016;11(7):e0153459.
27. Peng Y, Chen R, Qu F, et al. Low pretreatment lymphocyte/monocyte ratio is associated with the better efficacy of neoadjuvant chemotherapy in breast cancer patients. *Cancer Biol Ther* 2020;21(2):189-96.
28. Cuello-Lopez J, Fidalgo-Zapata A, Lopez-Agudelo L, et al. Platelet-to-lymphocyte ratio as a predictive factor of complete pathologic response to neoadjuvant chemotherapy in breast cancer. *PLoS One* 2018;13(11):e0207224.
29. Cochran WG. The comparison of percentages in matched samples. *Biometrika* 1950;37(3-4):256-66.
30. Higgins JP, Thompson SG, Deeks JJ, et al. Measuring inconsistency in meta-analyses. *BMJ* 2003;327(7414):557-60.
31. Mantel N, Haenszel W. Statistical aspects of the analysis of data from retrospective studies of disease. *J Natl Cancer Inst* 1959;22(4):719-48.
32. Graziano V, Grassadonia A, Iezzi L, et al. Combination of peripheral neutrophil-to-lymphocyte ratio and platelet-to-lymphocyte ratio is predictive of pathological complete response after neoadjuvant chemotherapy in breast cancer patients. *Breast* 2019;44:33-38.
33. Sahin AB, Cubukcu E, Ocak B, et al. Low pan-immune-inflammation-value predicts better

- chemotherapy response and survival in breast cancer patients treated with neoadjuvant chemotherapy. *Sci Rep* 2021;11(1):14662.
34. Kaytaz Tekyol K, Gurleyik G, Aktas A, et al. Pathological Complete Response to Neoadjuvant Chemotherapy in Patients With Breast Cancer: The Relationship Between Inflammatory Biomarkers and Molecular Subtypes. *Cureus* 2021;13(4):e14774.
35. Corbeau I, Thezenas S, Maran-Gonzalez A, et al. Inflammatory Blood Markers as Prognostic and Predictive Factors in Early Breast Cancer Patients Receiving Neoadjuvant Chemotherapy. *Cancers (Basel)* 2020;12(9)
36. Eren T, Karacin C, Ucar G, et al. Correlation between peripheral blood inflammatory indicators and pathologic complete response to neoadjuvant chemotherapy in locally advanced breast cancer patients. *Medicine (Baltimore)* 2020;99(22):e20346.
37. Hu Y, Wang S, Ding N, et al. Platelet/Lymphocyte Ratio Is Superior to Neutrophil/Lymphocyte Ratio as a Predictor of Chemotherapy Response and Disease-free Survival in Luminal B-like (HER2(-)) Breast Cancer. *Clin Breast Cancer* 2020;20(4):e403-e09.
38. Ma Y, Zhang J, Chen X. Lymphocyte-to-Monocyte Ratio is Associated with the Poor Prognosis of Breast Cancer Patients Receiving Neoadjuvant Chemotherapy. *Cancer Manag Res* 2021;13:1571-80.
39. Alan O, Akin Telli T, Aktas B, et al. Is insulin resistance a predictor for complete response in breast cancer patients who underwent neoadjuvant treatment? *World J Surg Oncol* 2020;18(1):242.
40. Jiang C, Lu Y, Zhang S, et al. Systemic Immune-Inflammation Index Is Superior to Neutrophil to Lymphocyte Ratio in Prognostic Assessment of Breast Cancer Patients Undergoing Neoadjuvant Chemotherapy. *Biomed Res Int* 2020;2020:7961568.
41. Al Jarroudi O, El Bairi K, Abda N, et al. Neutrophil-to-lymphocyte and platelet-to-lymphocyte ratios as predictors of outcomes in inflammatory breast cancer. *Biomark Med* 2021;15(14):1289-98.
42. Jiang C, Zhang S, Qiao K, et al. The Pretreatment Systemic Inflammation Response Index as a Useful Prognostic Factor is Better Than Lymphocyte to Monocyte Ratio in Breast Cancer Patients Receiving Neoadjuvant Chemotherapy. *Clin Breast Cancer* 2022;22(5):424-38.
43. Chung WS, Chen SC, Ko TM, et al. An Integrative Clinical Model for the Prediction of Pathological Complete Response in Patients with Operable Stage II and Stage III Triple-Negative Breast Cancer Receiving Neoadjuvant Chemotherapy. *Cancers (Basel)* 2022;14(17)
44. Jin X, Wang K, Shao X, et al. Prognostic implications of the peripheral platelet-to-lymphocyte ratio and neutrophil-to-lymphocyte ratio in predicting pathologic complete response after neoadjuvant chemotherapy in breast cancer patients. *Gland Surg* 2022;11(6):1057-66.
45. Song D, Li X, Zhang X. Expression and prognostic value of ratios of platelet lymphocyte, neutrophil lymphocyte and lymphocyte monocyte in breast cancer patients. *Am J Transl Res* 2022;14(5):3233-39.
46. Lou C, Jin F, Zhao Q, et al. Correlation of serum NLR, PLR and HALP with efficacy of neoadjuvant chemotherapy and prognosis of triple-negative breast cancer. *Am J Transl Res* 2022;14(5):3240-46.
47. Yang G, Liu P, Zheng L, et al. Novel peripheral blood parameters as predictors of neoadjuvant chemotherapy response in breast cancer. *Front Surg* 2022;9:1004687
48. Acikgoz O, Yildiz A, Bilici A, et al. Pretreatment platelet-to-lymphocyte ratio and neutrophil-to-lymphocyte ratio as a predictor of pathological complete response to

- 1  
2  
3 neoadjuvant chemotherapy in patients with breast cancer: single center experience from  
4 Turkey. *Anticancer Drugs* 2022;33(10):1150-55.
- 5  
6 49. Kim R, Kawai A, Wakisaka M, et al. Immune factors associated with the pathological and  
7 therapeutic effects of preoperative chemotherapy in patients with breast cancer. *Transl*  
8 *Oncol* 2021;14(1):100927.
- 9  
10 50. Mamounas EP, Fisher B. Preoperative (neoadjuvant) chemotherapy in patients with breast cancer.  
11 *Semin Oncol* 2001;28(4):389-99.
- 12  
13 51. Wang K, Shen T, Siegal GP, et al. The CD4/CD8 ratio of tumor-infiltrating lymphocytes at the  
14 tumor-host interface has prognostic value in triple-negative breast cancer. *Hum Pathol*  
15 2017;69:110-17.
- 16  
17 52. Liu C, Sun B, Xu B, et al. A panel containing PD-1, IL-2Ralpha, IL-10, and CA15-3 as a biomarker to  
18 discriminate breast cancer from benign breast disease. *Cancer Manag Res* 2018;10:1749-61.
- 19  
20 53. Wellenstein MD, Coffelt SB, Duits DEM, et al. Loss of p53 triggers WNT-dependent systemic  
21 inflammation to drive breast cancer metastasis. *Nature* 2019;572(7770):538-42.
- 22  
23 54. Dunn GP, Old LJ, Schreiber RD. The immunobiology of cancer immunosurveillance and  
24 immunoediting. *Immunity* 2004;21(2):137-48.
- 25  
26 55. Ownby HE, Roi LD, Isenberg RR, et al. Peripheral lymphocyte and eosinophil counts as indicators of  
27 prognosis in primary breast cancer. *Cancer* 1983;52(1):126-30.
- 28  
29 56. Hiraoka K, Miyamoto M, Cho Y, et al. Concurrent infiltration by CD8+ T cells and CD4+ T cells is a  
30 favourable prognostic factor in non-small-cell lung carcinoma. *Br J Cancer* 2006;94(2):275-80.
- 31  
32 57. Mijic S, Dabrosin C. Platelet Activation In Situ in Breasts at High Risk of Cancer: Relationship with  
33 Mammographic Density and Estradiol. *J Clin Endocrinol Metab* 2021;106(2):485-500.
- 34  
35 58. Kotoula V, Chatzopoulos K, Lakis S, et al. Tumors with high-density tumor infiltrating lymphocytes  
36 constitute a favorable entity in breast cancer: a pooled analysis of four prospective adjuvant  
37 trials. *Oncotarget* 2016;7(4):5074-87.
- 38  
39 59. Ibrahim EM, Al-Foheidi ME, Al-Mansour MM, et al. The prognostic value of tumor-infiltrating  
40 lymphocytes in triple-negative breast cancer: a meta-analysis. *Breast Cancer Res Treat*  
41 2014;148(3):467-76.
- 42  
43 60. Seo AN, Lee HJ, Kim EJ, et al. Tumour-infiltrating CD8+ lymphocytes as an independent predictive  
44 factor for pathological complete response to primary systemic therapy in breast cancer. *Br J*  
45 *Cancer* 2013;109(10):2705-13.
- 46  
47 61. Mao Y, Qu Q, Zhang Y, et al. The value of tumor infiltrating lymphocytes (TILs) for predicting  
48 response to neoadjuvant chemotherapy in breast cancer: a systematic review and  
49 meta-analysis. *PLoS One* 2014;9(12):e115103.
- 50  
51 62. Yang R, Chang Q, Meng X, et al. Prognostic value of Systemic immune-inflammation index in  
52 cancer: A meta-analysis. *J Cancer* 2018;9(18):3295-302.
- 53  
54 63. Egan K, Crowley D, Smyth P, et al. Platelet adhesion and degranulation induce pro-survival and  
55 pro-angiogenic signalling in ovarian cancer cells. *PLoS One* 2011;6(10):e26125.
- 56  
57 64. Kono SA, Heasley LE, Doebele RC, et al. Adding to the mix: fibroblast growth factor and  
58 platelet-derived growth factor receptor pathways as targets in non-small cell lung cancer.  
59 *Curr Cancer Drug Targets* 2012;12(2):107-23.
- 60  
61 65. Klinger MH, Jelkmann W. Role of blood platelets in infection and inflammation. *J Interferon*  
62 *Cytokine Res* 2002;22(9):913-22.
- 63  
64 66. Floris G, Richard F, Hamy AS, et al. Body Mass Index and Tumor-Infiltrating Lymphocytes in



- 1  
2  
3 Triple-Negative Breast Cancer. *J Natl Cancer Inst* 2021;113(2):146-53.
- 4 67. Liu C, Li X. Stage-Dependent Changes in Albumin, NLR, PLR, and AFR are Correlated with Shorter  
5 Survival in Patients with Gastric Cancer. *Clin Lab* 2019;65(9)
- 6 68. Solak Mekic M, Pedisic I, Sobat H, et al. The Role of Complete Blood Count Parameters in Patients  
7 with Colorectal Cancer. *Acta Clin Croat* 2018;57(4):624-29.
- 8 69. Suner A, Carr BI, Akkiz H, et al. C-Reactive Protein and Platelet-Lymphocyte Ratio as Potential  
9 Tumor Markers in Low-Alpha-Fetoprotein Hepatocellular Carcinoma. *Oncology*  
10 2019;96(1):25-32.
- 11 70. Gunduz S, Goksu SS, Arslan D, et al. Factors affecting disease-free survival in patients with human  
12 epidermal growth factor receptor 2-positive breast cancer who receive adjuvant  
13 trastuzumab. *Mol Clin Oncol* 2015;3(5):1109-12.
- 14 71. Ulas A, Avci N, Kos T, et al. Are neutrophil/lymphocyte ratio and platelet/lymphocyte ratio  
15 associated with prognosis in patients with HER2-positive early breast cancer receiving  
16 adjuvant trastuzumab? *J BUON* 2015;20(3):714-22.
- 17 72. Koh CH, Bhoo-Pathy N, Ng KL, et al. Utility of pre-treatment neutrophil-lymphocyte ratio and  
18 platelet-lymphocyte ratio as prognostic factors in breast cancer. *Br J Cancer*  
19 2015;113(1):150-8.
- 20 73. Koh YW, Lee HJ, Ahn JH, et al. Prognostic significance of the ratio of absolute neutrophil to  
21 lymphocyte counts for breast cancer patients with ER/PR-positivity and HER2-negativity in  
22 neoadjuvant setting. *Tumour Biol* 2014;35(10):9823-30.
- 23 74. Fujimoto Y, Ozawa H, Higuchi T, et al. Improved prognosis of low baseline  
24 neutrophil-to-lymphocyte ratio is significantly exclusive in breast cancer patients with high  
25 absolute counts of lymphocytes. *Mol Clin Oncol* 2019;10(2):275-84.
- 26 75. Hong J, Mao Y, Chen X, et al. Elevated preoperative neutrophil-to-lymphocyte ratio predicts poor  
27 disease-free survival in Chinese women with breast cancer. *Tumour Biol* 2016;37(3):4135-42.
- 28 76. Marin Hernandez C, Pinero Madrona A, Gil Vazquez PJ, et al. Usefulness of  
29 lymphocyte-to-monocyte, neutrophil-to-monocyte and neutrophil-to-lymphocyte ratios as  
30 prognostic markers in breast cancer patients treated with neoadjuvant chemotherapy. *Clin*  
31 *Transl Oncol* 2018;20(4):476-83.
- 32 77. Jia W, Wu J, Jia H, et al. The Peripheral Blood Neutrophil-To-Lymphocyte Ratio Is Superior to the  
33 Lymphocyte-To-Monocyte Ratio for Predicting the Long-Term Survival of Triple-Negative  
34 Breast Cancer Patients. *PLoS One* 2015;10(11):e0143061.
- 35 78. Zhang M, Huang XZ, Song YX, et al. High Platelet-to-Lymphocyte Ratio Predicts Poor Prognosis and  
36 Clinicopathological Characteristics in Patients with Breast Cancer: A Meta-Analysis. *Biomed*  
37 *Res Int* 2017;2017:9503025.
- 38  
39  
40  
41  
42  
43  
44  
45  
46  
47  
48  
49  
50  
51  
52  
53  
54  
55  
56  
57  
58  
59  
60



1  
2  
3  
4  
5  
6  
7  
8  
9  
10  
11  
12  
13  
14  
15  
16  
17  
18  
19  
20  
21  
22  
23  
24  
25  
26  
27  
28  
29  
30  
31  
32  
33  
34  
35  
36  
37  
38  
39  
40  
41  
42  
43  
44  
45  
46  
47  
48  
49  
50  
51  
52  
53  
54  
55  
56  
57  
58  
59  
60

For peer review only

**Table 1. Characteristics of included studies in meta-analysis.**

| NO. | Author     | Year | Country | Ethnicity | Study design  | Study period | Subtype   | Patients (n) | Median age (years) | Follow-up (month)  | Cut-off value | Method         | Outcomes   | NOS score |
|-----|------------|------|---------|-----------|---------------|--------------|-----------|--------------|--------------------|--------------------|---------------|----------------|------------|-----------|
| 1   | Asano      | 2016 | Japan   | Asian     | retrospective | 2007-2013    | All       | 177          | NA                 | 3.4 (0.6-6.0)      | 150           | Previous study | pCR/DFS    | 8         |
| 2   | Vincenzo   | 2018 | Italy   | Caucasian | retrospective | 1999-2018    | All       | 373          | 50 (26-82)         | NA                 | 104.47        | ROC            | pCR        | 6         |
| 3   | Losada     | 2018 | Spain   | Caucasian | retrospective | 2004-2018    | All       | 104          | 71 (65-89)         | 48 (6-149)         | 150           | Previous study | pCR/DFS    | 8         |
| 4   | Javier     | 2018 | America | Caucasian | retrospective | 2013-2016    | All       | 272          | 51 (27-85)         | NA                 | 150           | Previous study | pCR        | 6         |
| 5   | Peng       | 2019 | China   | Asian     | retrospective | 2013-2017    | All       | 808          | 50 (20-72)         | NA                 | 151.3         | ROC            | pCR+PR     | 6         |
| 6   | Ileana     | 2020 | France  | Caucasian | retrospective | 2005-2013    | All       | 206          | 50.3 (25.3-76.6)   | 80.4 (2.4-135.6)   | 150           | Previous study | pCR/OS/DFS | 8         |
| 7   | Tulay      | 2020 | Turkey  | Caucasian | retrospective | 2009-2018    | All       | 131          | 49 (23-74)         | NA                 | 119           | ROC            | pCR        | 6         |
| 8   | Hu         | 2020 | China   | Asian     | retrospective | 2012-2016    | Luminal B | 980          | NA                 | 37 (5-77)          | NA            | NA             | pCR/DFS    | 8         |
| 9   | Alan       | 2020 | Turkey  | Caucasian | retrospective | 2015-2017    | All       | 55           | 48.5 (27-80)       | 41 (15-49)         | 225.3         | ROC            | pCR        | 7         |
| 10  | Jiang      | 2020 | China   | Asian     | retrospective | 2014-2018    | All       | 249          | 51                 | 4-72               | 88.23         | ROC            | pCR/OS     | 8         |
| 11  | Christophe | 2021 | France  | Caucasian | retrospective | 1996-2016    | IBC       | 75           | NA                 | 124.8 (68.5-166.8) | 150           | Previous study | pCR/OS/DFS | 8         |
| 12  | Ahmet      | 2021 | Turkey  | Caucasian | retrospective | 2008-2019    | All       | 743          | 48 (22.0-83.5)     | 67.5 (10.5-194.4)  | 131.8         | ROC            | pCR        | 7         |
| 13  | Kübra      | 2021 | Turkey  | Caucasian | retrospective | 2016-2020    | All       | 150          | 45.6               | NA                 | 150           | Previous study | pCR        | 6         |
| 14  | Ma         | 2021 | China   | Asian     | retrospective | 2017-2018    | All       | 203          | NA                 | 31 (1-39)          | 135           | ROC            | pCR/DFS    | 8         |
| 15  | Ouissam    | 2021 | Morocco | Caucasian | retrospective | 2010-2014    | IBC       | 102          | 49 (29-88)         | NA                 | 178           | ROC            | pCR/OS/DFS | 7         |
| 16  | Cong       | 2022 | China   | Asian     | retrospective | 2012-2016    | All       | 280          | 49                 | NA                 | 155           | ROC            | pCR/OS     | 7         |
| 17  | Chung      | 2022 | China   | Asian     | retrospective | 2012-2019    | TNBC      | 88           | 51                 | NA                 | 148.14        | ROC            | pCR        | 6         |
| 18  | Jin        | 2022 | China   | Asian     | retrospective | 2014-2019    | All       | 67           | 51 (27-81)         | NA                 | 106.3         | ROC            | pCR        | 6         |
| 19  | Song       | 2022 | China   | Asian     | retrospective | 2016-2018    | All       | 144          | 50.4               | 32 (1-40)          | 158.365       | ROC            | DFS        | 8         |
| 20  | Lou        | 2022 | China   | Asian     | retrospective | 2015-2018    | TNBC      | 92           | 52.3 (29-67)       | NA                 | 141.36        | ROC            | pCR        | 6         |
| 21  | Yang       | 2022 | China   | Asian     | retrospective | 2020-2022    | All       | 95           | NA                 | NA                 | 118.78        | ROC            | pCR        | 6         |
| 22  | Acikgoz    | 2022 | Turkey  | Caucasian | retrospective | 2014-2019    | All       | 139          | 45 (25-75)         | 39.5 (7.5-93)      | 181.7         | ROC            | pCR        | 7         |

**Abbreviations:** NA: not available; OS: overall survival; DFS: disease-free survival; pCR: pathologic complete response; ROC: receiver operating characteristic curve; NOS: Newcastle-Ottawa Scale.

**Table 2. Meta-analysis of the association between PLR and pCR of BC with NACT.**

| Factors          | No. of studies | No. of patients | Effects model | OR (95% CI)     | p      | Heterogeneity  |                |
|------------------|----------------|-----------------|---------------|-----------------|--------|----------------|----------------|
|                  |                |                 |               |                 |        | I <sup>2</sup> | P <sub>H</sub> |
| <b>Overall</b>   | 19             | 4301            | Random        | 0.77(0.67-0.88) | <0.001 | 75.80%         | <0.001         |
| <b>Ethnicity</b> |                |                 |               |                 |        |                |                |
| Caucasian        | 11             | 2350            | Random        | 0.77(0.68-0.88) | <0.001 | 61.60%         | 0.004          |
| Asian            | 8              | 1951            | Random        | 0.83(0.58-1.17) | 0.288  | 85.00%         | <0.001         |
| <b>Method</b>    |                |                 |               |                 |        |                |                |
| Previous study   | 6              | 984             | Fixed         | 0.86(0.78-0.94) | 0.001  | 39.30%         | 0.144          |
| ROC              | 12             | 2337            | Random        | 0.72(0.57-0.92) | 0.008  | 81.10%         | <0.001         |
| <b>Subtype</b>   |                |                 |               |                 |        |                |                |
| All              | 14             | 2964            | Random        | 0.76(0.64-0.89) | 0.001  | 74.00%         | <0.001         |
| IBC              | 2              | 177             | Fixed         | 0.83(0.70-0.97) | 0.021  | 0.00%          | 0.368          |
| TNBC             | 2              | 180             | Random        | 0.91(0.26-3.21) | 0.885  | 94.70%         | <0.001         |
| Luminal B        | 1              | 980             | Fixed         | 0.76(0.61-0.94) | 0.013  | —              | —              |
| <b>Cut-off</b>   |                |                 |               |                 |        |                |                |
| <150             | 9              | 2041            | Random        | 0.80(0.59-1.10) | 0.172  | 82.90%         | <0.001         |
| ≥150             | 9              | 1280            | Random        | 0.78(0.67-0.91) | 0.001  | 68.20%         | 0.001          |

**Abbreviations:** ROC: receiver operating characteristic curve; IBC: inflammatory breast cancer; TNBC: triple negative breast cancer; OR: odds ratio; 95% CI: 95% confidence interval;  $P_h$ :  $p$  values of Q test for heterogeneity test.

**Table 3. Meta-analysis of the association between PLR and OS, DFS of BC with NACT.**

|            | Factors          | No. of studies | No. of patients | Effects model      | HR (95% CI)        | p      | Heterogeneity  |                |
|------------|------------------|----------------|-----------------|--------------------|--------------------|--------|----------------|----------------|
|            |                  |                |                 |                    |                    |        | I <sup>2</sup> | P <sub>H</sub> |
| <b>OS</b>  | <b>Overall</b>   | 5              | 912             | Fixed              | 1.898(1.394-2.586) | <0.001 | 7.40%          | 0.365          |
|            | <b>Ethnicity</b> |                |                 |                    |                    |        |                |                |
|            | Caucasian        | 3              | 383             | Fixed              | 1.845(1.258-2.706) | 0.002  | 0.00%          | 0.378          |
|            | Asian            | 2              | 529             | Fixed              | 2.002(1.187-3.377) | 0.009  | 56.70%         | 0.128          |
|            | <b>Method</b>    |                |                 |                    |                    |        |                |                |
|            | Previous study   | 2              | 281             | Fixed              | 1.579(0.973-2.564) | 0.065  | 0.00%          | 0.345          |
|            | ROC              | 3              | 631             | Fixed              | 2.153(1.442-3.216) | <0.001 | 19.80%         | 0.288          |
|            | <b>Subtype</b>   |                |                 |                    |                    |        |                |                |
|            | All              | 3              | 735             | Fixed              | 1.922(1.306-2.828) | 0.001  | 15.30%         | 0.307          |
|            | IBC              | 2              | 177             | Fixed              | 1.857(1.110-3.109) | <0.018 | 48.60%         | 0.163          |
| <b>DFS</b> | <b>Overall</b>   | 7              | 1887            | Fixed              | 1.972(1.557-2.499) | <0.001 | 0.00%          | 0.460          |
|            | <b>Ethnicity</b> |                |                 |                    |                    |        |                |                |
|            | Caucasian        | 3              | 383             | Fixed              | 2.001(1.415-2.831) | <0.001 | 0.00%          | 0.568          |
|            | Asian            | 4              | 1504            | Fixed              | 1.948(1.409-2.692) | <0.001 | 33.90%         | 0.209          |
|            | <b>Method</b>    |                |                 |                    |                    |        |                |                |
|            | Previous study   | 3              | 458             | Fixed              | 1.990(1.374-2.884) | <0.001 | 0.00%          | 0.513          |
|            | ROC              | 3              | 449             | Fixed              | 2.544(1.614-4.010) | <0.001 | 1.50%          | 0.362          |
|            | <b>Subtype</b>   |                |                 |                    |                    |        |                |                |
|            | All              | 4              | 730             | Fixed              | 2.260(1.576-3.240) | <0.001 | 0.00%          | 0.407          |
|            | IBC              | 2              | 177             | Fixed              | 2.086(1.295-3.361) | 0.003  | 6.50%          | 0.301          |
| Luminal B  | 1                | 980            | Fixed           | 1.576(1.039-2.390) | 0.032              | —      | —              |                |

**Abbreviations:** ROC: receiver operating characteristic curve; IBC: inflammatory breast cancer; HR: hazard ratio; 95% CI: 95% confidence interval;  $P_h$ :  $p$  values of Q test for heterogeneity test.

## Figure legends

**Figure 1: The forest plot between elevated PLR and pCR in BC with NACT.**

**Figure 2: Sensitivity analysis and Begg's funnel plot of publication bias test of PLR for pCR in BC with NACT.**

## Supplemental files

**Table S1. Meta-analysis of the association between PLR and clinicopathological parameters of BC with NACT.**

**Figure S1: The flow diagram of publications selection.**

**Figure S2: The forest plot between elevated PLR and OS in BC with NACT.**

**Figure S3: The forest plot between elevated PLR and DFS in BC with NACT.**

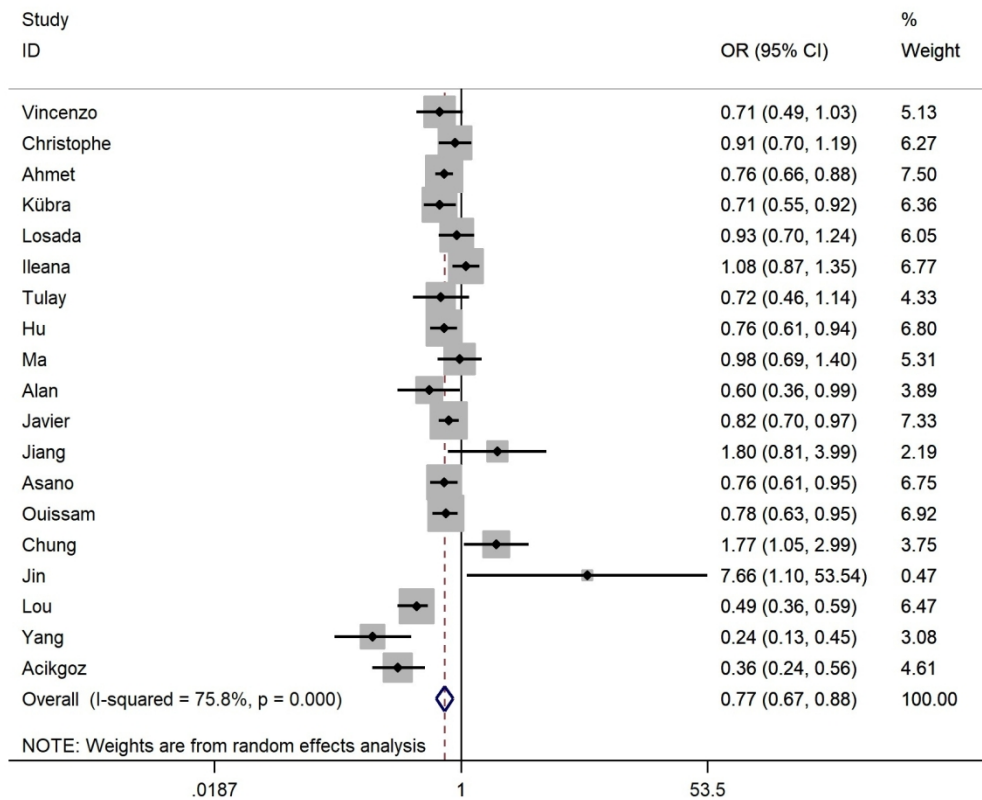

Figure 1

461x372mm (96 x 96 DPI)

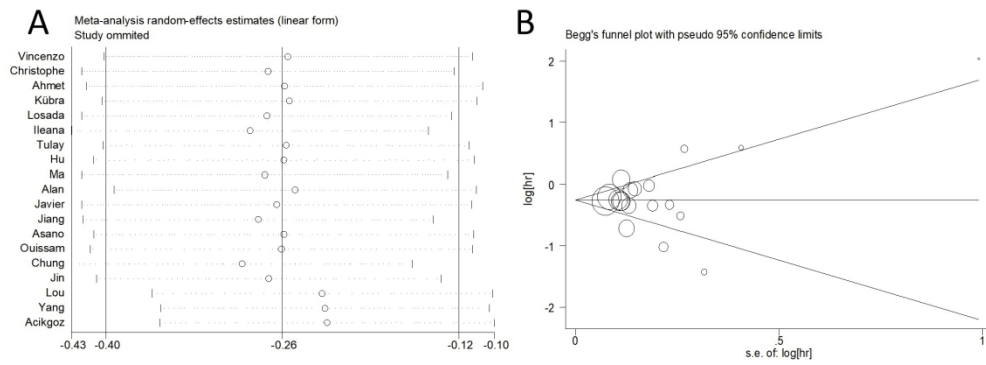

Figure 2

295x111mm (192 x 192 DPI)

**Table S1. Meta-analysis of the association between PLR and clinicopathological parameters of BC with NACT.**

| Variable                                        | No. of studies | No. of patients | Effects model | OR (95% CI)     | p      | Heterogeneity  |                |
|-------------------------------------------------|----------------|-----------------|---------------|-----------------|--------|----------------|----------------|
|                                                 |                |                 |               |                 |        | I <sup>2</sup> | P <sub>H</sub> |
| Age (Yong vs. Old)                              | 9              | 3273            | Fixed         | 0.86(0.79-0.93) | <0.001 | 40.60%         | 0.096          |
| Histologic type (Ductal vs. Others)             | 4              | 1520            | Fixed         | 0.97(0.94-1.01) | 0.147  | 7.20%          | 0.357          |
| Grade (G1+G2 vs. G3+unknown)                    | 4              | 1692            | Fixed         | 0.96(0.91-1.02) | 0.203  | 0.00%          | 0.439          |
| T stage (T1–T2 vs. T3–T4)                       | 6              | 2178            | Random        | 1.05(1.00-1.11) | 0.035  | 70.30%         | 0.005          |
| Lymph node metastasis (No vs. Yes)              | 5              | 2341            | Fixed         | 0.97(0.88-1.06) | 0.440  | 0.00%          | 0.952          |
| ki-67 (<14 vs. ≥14)                             | 7              | 2783            | Fixed         | 0.99(0.90-1.09) | 0.771  | 0.00%          | 0.458          |
| Hormone Receptor (– vs. +)                      | 6              | 2049            | Fixed         | 0.94(0.84-1.06) | 0.309  | 0.00%          | 0.526          |
| HER-2 (– vs. +)                                 | 7              | 2023            | Random        | 0.91(0.76-1.09) | 0.293  | 69.20%         | 0.003          |
| Molecular subtype (Luminal vs. TriNeg + HER-2+) | 8              | 2143            | Fixed         | 0.99(0.92-1.07) | 0.845  | 15.20%         | 0.310          |
| Menopausal status (Pre vs. Post)                | 5              | 1604            | Fixed         | 0.83(0.76-0.90) | <0.001 | 50.80%         | 0.087          |

**Abbreviations:** OR: odds ratio; 95% CI: 95% confidence interval;  $P_h$ :  $p$  values of Q test for heterogeneity test.



1  
2  
3  
4  
5  
6  
7  
8  
9  
10  
11  
12  
13  
14  
15  
16  
17  
18  
19  
20  
21  
22  
23  
24  
25  
26  
27  
28  
29  
30  
31  
32  
33  
34  
35  
36  
37  
38  
39  
40  
41  
42  
43  
44  
45  
46  
47  
48  
49  
50  
51  
52  
53  
54  
55  
56  
57  
58  
59  
60

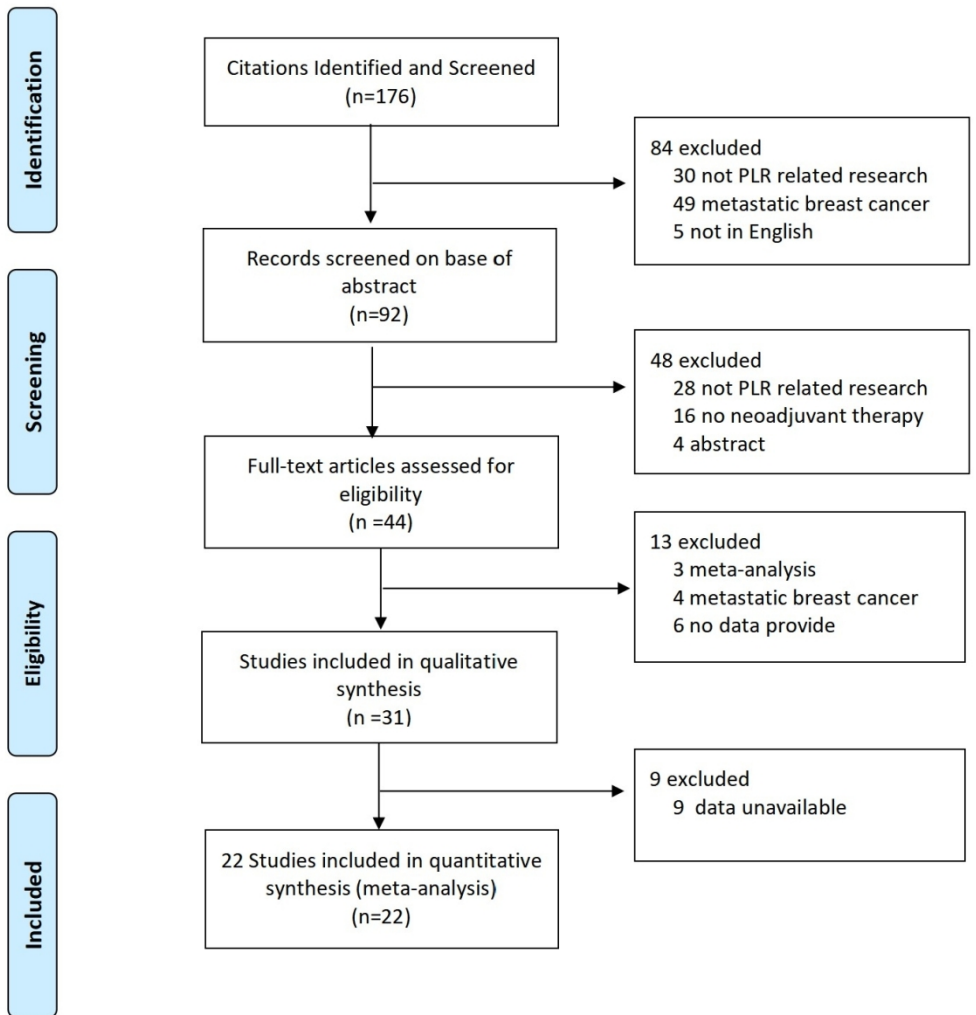

187x193mm (192 x 192 DPI)

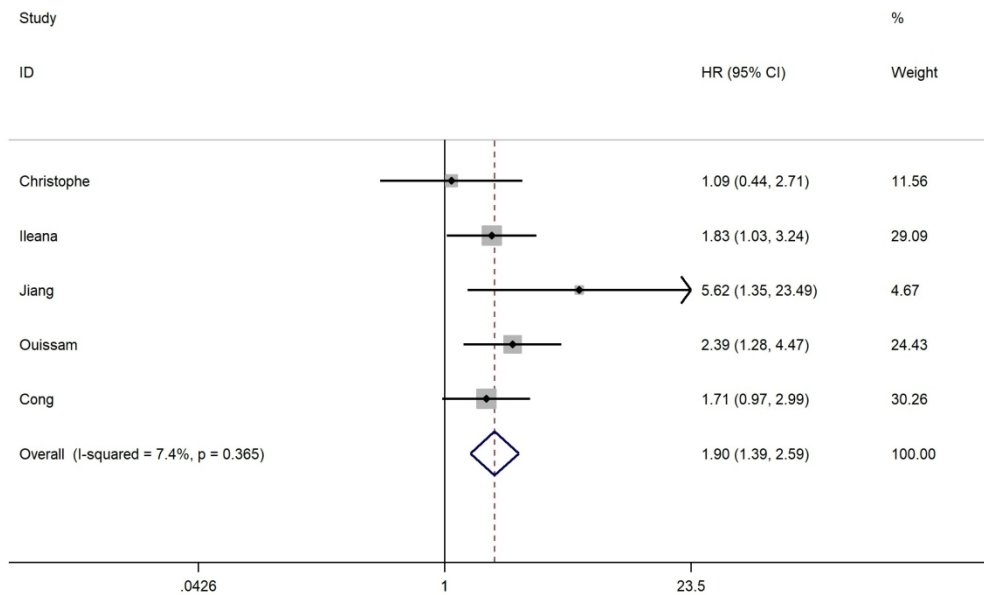

584x354mm (96 x 96 DPI)

1  
2  
3  
4  
5  
6  
7  
8  
9  
10  
11  
12  
13  
14  
15  
16  
17  
18  
19  
20  
21  
22  
23  
24  
25  
26  
27  
28  
29  
30  
31  
32  
33  
34  
35  
36  
37  
38  
39  
40  
41  
42  
43  
44  
45  
46  
47  
48  
49  
50  
51  
52  
53  
54  
55  
56  
57  
58  
59  
60

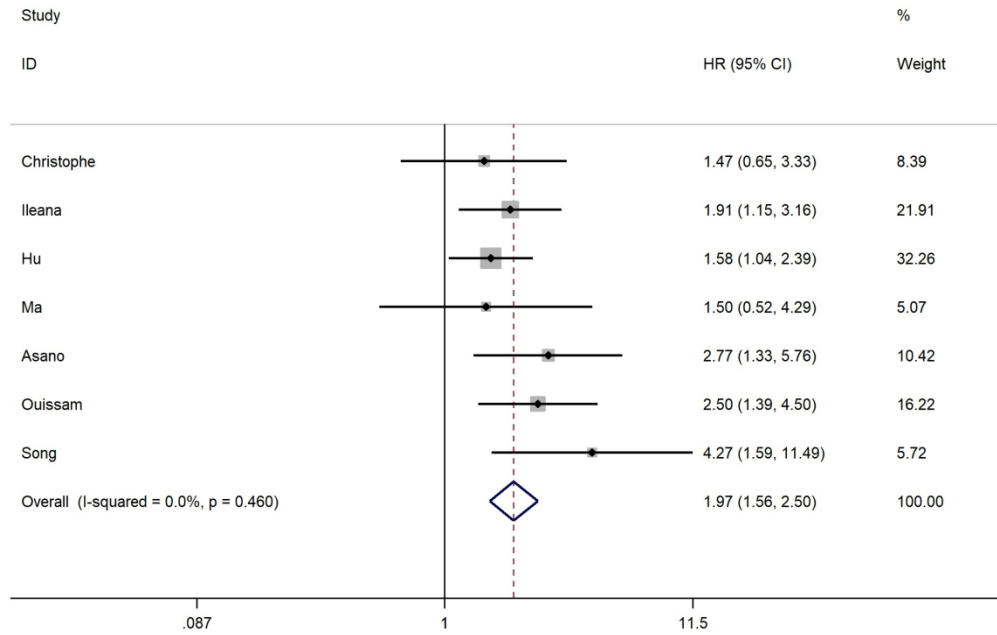

556x357mm (96 x 96 DPI)

## Standards for Reporting Qualitative Research (SRQR)

O'Brien B.C., Harris, I.B., Beckman, T.J., Reed, D.A., & Cook, D.A. (2014). Standards for reporting qualitative research: a synthesis of recommendations. *Academic Medicine*, 89(9), 1245-1251.

| No. | Topic                                       | Item                                                                                                                                                                                                                                                                                                                                     | Page Number                 |
|-----|---------------------------------------------|------------------------------------------------------------------------------------------------------------------------------------------------------------------------------------------------------------------------------------------------------------------------------------------------------------------------------------------|-----------------------------|
|     | <b>Title and abstract</b>                   |                                                                                                                                                                                                                                                                                                                                          |                             |
| S1  | Title                                       | Concise description of the nature and topic of the study identifying the study as qualitative or indicating the approach (e.g., ethnography, grounded theory) or data collection methods (e.g., interview, focus group) is recommended                                                                                                   | Page 1                      |
| S2  | Abstract                                    | Summary of key elements of the study using the abstract format of the intended publication; typically includes objective, methods, results, and conclusions                                                                                                                                                                              | Page 2                      |
|     | <b>Introduction</b>                         |                                                                                                                                                                                                                                                                                                                                          |                             |
| S3  | Problem formulation                         | Description and significance of the problem/phenomenon studied; review of relevant theory and empirical work; problem statement                                                                                                                                                                                                          | Page 4,<br>Page 5, line 1-7 |
| S4  | Purpose or research question                | Purpose of the study and specific objectives or questions                                                                                                                                                                                                                                                                                | Page 5, line 8-9            |
|     | <b>Methods</b>                              |                                                                                                                                                                                                                                                                                                                                          |                             |
| S5  | Qualitative approach and research paradigm  | Qualitative approach (e.g., ethnography, grounded theory, case study, phenomenology, narrative research) and guiding theory if appropriate; identifying the research paradigm (e.g., positivist, constructivist/interpretivist) is also recommended                                                                                      | Page 5, line 11-21          |
| S6  | Researcher characteristics and reflexivity  | Researchers' characteristics that may influence the research, including personal attributes, qualifications/experience, relationship with participants, assumptions, or presuppositions; potential or actual interaction between researchers' characteristics and the research questions, approach, methods, results, or transferability | Page 6, line 6              |
| S7  | Context                                     | Setting/site and salient contextual factors; rationale <sup>a</sup>                                                                                                                                                                                                                                                                      | Page 6, line 7-8            |
| S8  | Sampling strategy                           | How and why research participants, documents, or events were selected; criteria for deciding when no further sampling was necessary (e.g., sampling saturation); rationale <sup>a</sup>                                                                                                                                                  | Page 5, line 26-29          |
| S9  | Ethical issues pertaining to human subjects | Documentation of approval by an appropriate ethics review board and participant consent, or explanation for lack thereof; other confidentiality and data security issues                                                                                                                                                                 | Page 5, line 23-24          |

|                                                                                                  |                                                                                                                                                                                                                                                                                                       |                                                     |
|--------------------------------------------------------------------------------------------------|-------------------------------------------------------------------------------------------------------------------------------------------------------------------------------------------------------------------------------------------------------------------------------------------------------|-----------------------------------------------------|
| S10 Data collection methods                                                                      | Types of data collected; details of data collection procedures including (as appropriate) start and stop dates of data collection and analysis, iterative process, triangulation of sources/methods, and modification of procedures in response to evolving study findings; rationale <sup>a</sup>    | Page 6, line 6-13                                   |
| S11 Data collection instruments and technologies                                                 | Description of instruments (e.g., interview guides, questionnaires) and devices (e.g., audio recorders) used for data collection; if/how the instrument(s) changed over the course of the study                                                                                                       | Page 5, line 13-18                                  |
| S12 Units of study                                                                               | Number and relevant characteristics of participants, documents, or events included in the study; level of participation (could be reported in results)                                                                                                                                                | Page 7, line 13                                     |
| S13 Data processing                                                                              | Methods for processing data prior to and during analysis, including transcription, data entry, data management and security, verification of data integrity, data coding, and anonymization/deidentification of excerpts                                                                              | Page 6, line 6-13                                   |
| S14 Data analysis                                                                                | Process by which inferences, themes, etc., were identified and developed, including researchers involved in data analysis; usually references a specific paradigm or approach; rationale <sup>a</sup>                                                                                                 | Page 6, line 20-30<br>Page 7, line 1-6              |
| S15 Techniques to enhance trustworthiness                                                        | Techniques to enhance trustworthiness and credibility of data analysis (e.g., member checking, audit trail, triangulation); rationale <sup>a</sup>                                                                                                                                                    | Page 6, line 14-18                                  |
| <b>Results/Findings</b>                                                                          |                                                                                                                                                                                                                                                                                                       |                                                     |
| S16 Synthesis and interpretation                                                                 | Main findings (e.g., interpretations, inferences, and themes); might include development of a theory or model, or integration with prior research or theory                                                                                                                                           | Page 9, line 9-14                                   |
| S17 Links to empirical data                                                                      | Evidence (e.g., quotes, field notes, text excerpts, photographs) to substantiate analytic findings                                                                                                                                                                                                    | Page 12, line 11-30<br>Page 13                      |
| <b>Discussion</b>                                                                                |                                                                                                                                                                                                                                                                                                       |                                                     |
| S18 Integration with prior work, implications, transferability, and contribution(s) to the field | Short summary of main findings; explanation of how findings and conclusions connect to, support, elaborate on, or challenge conclusions of earlier scholarship; discussion of scope of application/generalizability; identification of unique contribution(s) to scholarship in a discipline or field | Page 10, line 15-30<br>Page 11<br>Page 12, line 1-7 |
| S19 Limitations                                                                                  | Trustworthiness and limitations of findings                                                                                                                                                                                                                                                           | Page 14, line 9-20                                  |
| <b>Other</b>                                                                                     |                                                                                                                                                                                                                                                                                                       |                                                     |
| S20 Conflicts of interest                                                                        | Potential sources of influence or perceived influence on study conduct and conclusions; how these were managed                                                                                                                                                                                        | Page 15, line 13-14                                 |
| S21 Funding                                                                                      | Sources of funding and other support; role of funders in data collection, interpretation, and reporting                                                                                                                                                                                               | Page 15, line 27-29                                 |

<sup>a</sup>The rationale should briefly discuss the justification for choosing that theory, approach, method, or technique rather than other options available, the assumptions and limitations implicit in those choices, and how those choices influence study conclusions and transferability. As appropriate, the rationale for several items might be discussed together.

# BMJ Open

## Prognostic Significance of Platelet-Lymphocyte Ratio (PLR) in Breast Cancer Patients Treated with Neoadjuvant Chemotherapy: A Meta-analysis

|                                 |                                                                                                                                                                                                                                                                                                                                                                                                                                                                                                                                                                                                                                                                                                                                                                      |
|---------------------------------|----------------------------------------------------------------------------------------------------------------------------------------------------------------------------------------------------------------------------------------------------------------------------------------------------------------------------------------------------------------------------------------------------------------------------------------------------------------------------------------------------------------------------------------------------------------------------------------------------------------------------------------------------------------------------------------------------------------------------------------------------------------------|
| Journal:                        | <i>BMJ Open</i>                                                                                                                                                                                                                                                                                                                                                                                                                                                                                                                                                                                                                                                                                                                                                      |
| Manuscript ID                   | bmjopen-2023-074874.R1                                                                                                                                                                                                                                                                                                                                                                                                                                                                                                                                                                                                                                                                                                                                               |
| Article Type:                   | Original research                                                                                                                                                                                                                                                                                                                                                                                                                                                                                                                                                                                                                                                                                                                                                    |
| Date Submitted by the Author:   | 13-Oct-2023                                                                                                                                                                                                                                                                                                                                                                                                                                                                                                                                                                                                                                                                                                                                                          |
| Complete List of Authors:       | <p>Qi, Xue; Nantong Liangchun Hospital of Traditional Chinese Medicine, Department of Oncology</p> <p>Chen, Jia; Affiliated Tumor Hospital of Nantong University, Department of Oncology</p> <p>Wei, Sheng; Affiliated Tumor Hospital of Nantong University, Department of Radiotherapy</p> <p>Ni, Jingyi; Affiliated Tumor Hospital of Nantong University, Department of Oncology</p> <p>Song, Li; Affiliated Tumor Hospital of Nantong University, Department of Oncology</p> <p>Jin, Conghui; Affiliated Tumor Hospital of Nantong University, Department of Oncology</p> <p>Yang, Lei; Affiliated Tumor Hospital of Nantong University, Department of Oncology</p> <p>Zhang, Xunlei; Affiliated Tumor Hospital of Nantong University, Department of Oncology</p> |
| <b>Primary Subject Heading</b>: | Oncology                                                                                                                                                                                                                                                                                                                                                                                                                                                                                                                                                                                                                                                                                                                                                             |
| Secondary Subject Heading:      | Evidence based practice, Pathology, Pharmacology and therapeutics, Surgery                                                                                                                                                                                                                                                                                                                                                                                                                                                                                                                                                                                                                                                                                           |
| Keywords:                       | ONCOLOGY, Breast tumours < ONCOLOGY, Prognosis                                                                                                                                                                                                                                                                                                                                                                                                                                                                                                                                                                                                                                                                                                                       |
|                                 |                                                                                                                                                                                                                                                                                                                                                                                                                                                                                                                                                                                                                                                                                                                                                                      |

SCHOLARONE™  
Manuscripts

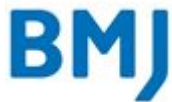

I, the Submitting Author has the right to grant and does grant on behalf of all authors of the Work (as defined in the below author licence), an exclusive licence and/or a non-exclusive licence for contributions from authors who are: i) UK Crown employees; ii) where BMJ has agreed a CC-BY licence shall apply, and/or iii) in accordance with the terms applicable for US Federal Government officers or employees acting as part of their official duties; on a worldwide, perpetual, irrevocable, royalty-free basis to BMJ Publishing Group Ltd ("BMJ") its licensees and where the relevant Journal is co-owned by BMJ to the co-owners of the Journal, to publish the Work in this journal and any other BMJ products and to exploit all rights, as set out in our [licence](#).

The Submitting Author accepts and understands that any supply made under these terms is made by BMJ to the Submitting Author unless you are acting as an employee on behalf of your employer or a postgraduate student of an affiliated institution which is paying any applicable article publishing charge ("APC") for Open Access articles. Where the Submitting Author wishes to make the Work available on an Open Access basis (and intends to pay the relevant APC), the terms of reuse of such Open Access shall be governed by a Creative Commons licence – details of these licences and which [Creative Commons](#) licence will apply to this Work are set out in our licence referred to above.

Other than as permitted in any relevant BMJ Author's Self Archiving Policies, I confirm this Work has not been accepted for publication elsewhere, is not being considered for publication elsewhere and does not duplicate material already published. I confirm all authors consent to publication of this Work and authorise the granting of this licence.

1  
2  
3  
4 **Prognostic Significance of Platelet-Lymphocyte Ratio (PLR)**  
5  
6 **in Breast Cancer Patients Treated with Neoadjuvant**  
7  
8 **Chemotherapy: A Meta-analysis**  
9  
10

11 **Xue Qi<sup>1,\*</sup>, Jia Chen<sup>2,\*</sup>, Sheng Wei<sup>3,\*</sup>, Jingyi Ni<sup>2</sup>, Li Song<sup>2</sup>, Conghui**  
12 **Jin<sup>2</sup>, Lei Yang<sup>2,#</sup>, Xunlei Zhang<sup>2,#</sup>**  
13  
14

15  
16  
17 1. Department of Oncology, Nantong Liangchun Hospital of Traditional Chinese  
18 Medicine, Nantong Jiangsu 226300, China;

19  
20  
21 2. Department of Oncology, Tumor Hospital Affiliated to Nantong University,  
22 Nantong Jiangsu 226300, China;

23  
24  
25 3. Department of Radiotherapy, Tumor Hospital Affiliated to Nantong University,  
26 Nantong Jiangsu 226300, China;

27  
28  
29 **\* These authors contributed equally to this work**  
30  
31

32  
33 **# Correspondence Authors:**  
34

35  
36 1. Xunlei Zhang, Department of Oncology, Tumor Hospital Affiliated to Nantong  
37 University, Nantong Jiangsu 226300, China; Tel/fax +86 513 8672 9169; E-mail:  
38 477750911@qq.com  
39

40  
41 2. Lei Yang, Department of Oncology, Tumor Hospital Affiliated to Nantong  
42 University, Nantong Jiangsu 226300, China; Tel/fax +86 513 8672 8238; E-mail:  
43 leiyang.53@163.com  
44  
45  
46  
47  
48  
49  
50  
51  
52  
53  
54  
55  
56  
57  
58  
59  
60



## Abstract

**Objective:** PLR (platelet-lymphocyte ratio), known as a key systemic inflammatory parameter, have been proved to be associated with response to neoadjuvant therapy in breast cancer (BC); however, the results remain controversial. This meta-analysis was carried out to evaluate the prognostic values of PLR in breast cancer patients treated with neoadjuvant chemotherapy.

**Design:** Meta-analysis.

**Data sources:** Relevant literature published on the following databases: PubMed, Embase, Web of Science databases and the Cochrane Library.

**Eligibility criteria:** All studies involving patients with breast cancer treated with NACT and peripheral blood pretreatment PLR recorded were included.

**Data extraction and synthesis:** Two researchers independently extracted and evaluated hazard ratio (HR) /Odds Ratio (OR) and its 95% confidence (CI) of survival outcomes, pathologic complete response (pCR) rate and clinicopathological parameters.

**Results:** The last search was updated to Dec 31, 2022. A total of 22 studies with 5533 breast cancer patients treated with neoadjuvant chemotherapy were enrolled in the final meta-analysis. Our results demonstrate that elevated PLR value appears to correlate with low pCR rate (HR: 0.77, 95% CI: 0.67-0.88,  $p < 0.001$ ,  $I^2=75.80\%$ ,  $P_h < 0.001$ ) and poor prognosis, including OS (HR: 1.90, 95% CI: 1.39-2.59,  $p < 0.001$ ;  $I^2= 7.40\%$ ,  $P_h = 0.365$ ) and DFS (HR: 1.97, 95% CI: 1.56-2.50,  $p < 0.001$ ;  $I^2= 0.0\%$ ,  $P_h = 0.460$ ). Furthermore, PLR level was associated with age (OR: 0.86, 95% CI: 0.79-0.93,  $p < 0.001$ ,  $I^2= 40.60\%$ ,  $P_h = 0.096$ ), menopausal status (OR: 0.83, 95% CI: 0.76-0.90,  $p < 0.001$ ,  $I^2= 50.80\%$ ,  $P_h = 0.087$ ) and T stage (OR: 1.05, 95% CI: 1.00-1.11,  $p = 0.035$ ;  $I^2= 70.30\%$ ,  $P_h = 0.005$ ) of breast cancer patients.

**Conclusions:** This meta-analysis demonstrated that high PLR was significantly related to the low pCR rate, poor OS and PFS of breast cancer patients treated with neoadjuvant chemotherapy. Therefore, PLR can be used as a potential predictor biomarker for the efficacy of neoadjuvant chemotherapy in breast cancer.

## Strengths and limitations of this study

1. This is the first meta-analysis to assess the role of platelet-lymphocyte ratio (PLR) in predicting pCR rate and survival in BC patients treated with NACT.
2. Scientific and reliable statistical methods were applied.
3. The association between PLR and clinicopathological parameters of BC with NACT were explored in the stratified analysis.
4. All the studies included in this meta-analysis were retrospective and lacked detailed clinicopathological information, which may lead to bias of our results.

## Keywords

Platelet, Lymphocyte, PLR, Breast Cancer, Neoadjuvant Chemotherapy, Meta-Analysis

**Word count: 8455**

## Introduction

Breast cancer (BC) is the most frequently diagnosed malignant neoplasm in women worldwide.<sup>1</sup> BC patients in China account for 12.2% of the total number of newly diagnosed and 9.6% of all breast cancer related deaths in the world.<sup>2</sup> About 20-25% of patients are diagnosed with locally advanced breast cancer, which prone to recurrence and metastasis after surgery without any Preoperative treatment.<sup>3 4</sup> Survival rates for BC patients have increased dramatically due to the development of treatment strategies, such as individualized treatment plans made by multidisciplinary teams, including surgical, radiation and medical oncology.<sup>5</sup> At present, neoadjuvant chemotherapy (NACT) has become the standard and effective treatment for patients with locally advanced breast cancer.<sup>6</sup> The aim of NACT is mainly to reduce tumor size and the stage of tumors, improve tumor operability, and improve the success rates of breast conservative operation.<sup>7-9</sup> Additionally, the effects of NACT could provide information to assess the efficacy of chemotherapy during the treatment.<sup>10</sup> However, not all patients receiving neoadjuvant therapy can achieve therapeutic benefit, especially pathologic complete response (pCR). Previous studies showed that the pCR rate of NACT is about 30% in human epidermal growth factor receptor 2 (HER2) (+) patients, 30-50% in triple negative breast cancer and less than 10% in estrogen receptor (ER) (+) and HER2 (-) breast cancer patients.<sup>11-13</sup> The situation may be related to different pathological types, ER status, HER-2 status, disease stage, and other factors. Some gene mutations, such as PIK3CA, TP53, SIRT5 and CDKN2A, have been proved to be associated with poor response to NACT in breast cancer patients.<sup>14</sup> However, these above biomarkers are expensive and difficult to obtain. Hence, it's necessary to find a convenient, inexpensive and reliable marker, which can predict response after NACT.

It is well recognized that the systemic inflammatory response plays an essential role in breast cancer progression and development.<sup>15 16</sup> Numerous studies have shown that inflammatory biomarkers such as neutrophil-to-lymphocyte ratio (NLR), platelet-to-lymphocyte ratio (PLR) and systemic immune-inflammation index (SII),

1  
2  
3  
4 are associated with chemosensitivity and prognosis for different malignancies.<sup>17-21</sup>  
5  
6 PLR, as one of the most commonly used markers, was proved to be an convenient and  
7  
8 cost-effective blood-derived prognostic marker to evaluate the prognosis of breast  
9  
10 cancer. Elevated PLR has been linked with poor prognosis for breast cancer in  
11  
12 previous studies.<sup>22-24</sup> Furthermore, some research found that a higher PLR may lead to  
13  
14 a worse response to NACT for breast cancer patients.<sup>25 26</sup> However, some other  
15  
16 studies showed that the BC patients with higher PLR may achieve more pCR rate  
17  
18 after NACT.<sup>27 28</sup> Thus, the role of PLR as a predictor for outcomes in BC patients  
19  
20 after NACT is still not clear. This meta-analysis is aimed to explore the predictive  
21  
22 value of PLR in patients with breast cancer treated with NACT.

## 23 **Materials and Methods**

### 24 **Literature search**

25  
26  
27  
28 A systematic literature search was conducted based on the following databases:  
29  
30 PubMed, Embase, Web of Science databases and the Cochrane Library. The  
31  
32 keywords for the search strategy are as follows: (“PLR” or “platelet lymphocyte  
33  
34 ratio” or “platelet-to-lymphocyte ratio” or “platelet-lymphocyte ratio”) and (“breast  
35  
36 cancer”, “breast tumor”, “breast carcinoma”, “breast neoplasms”, “mammary cancer”)  
37  
38 and (“neoadjuvant chemotherapy”, “preoperative chemotherapy”, “preoperative  
39  
40 systemic treatment”, “pre-surgical treatment”, “primary chemotherapy”). The last  
41  
42 search was updated to Dec 31, 2022, and all the articles were limited to  
43  
44 English-language. We also used a hand search for the reference list of the retrieved  
45  
46 articles in order to identify additional studies. The selection process of the  
47  
48 meta-analysis is shown in Figure S1. This study was conducted according to the  
49  
50 Preferred Reporting Items for Systematic Reviews and Meta-Analyses (PRISMA)  
51  
52 statement. No patient consent and ethical approval were required in this study.

### 53 **Inclusion and exclusion criteria**

54  
55  
56 The included studies in this analysis had to meet the following criteria: (1)  
57  
58 patients with breast cancer received neoadjuvant treatment and surgery; (2) studies  
59  
60 with the peripheral blood pretreatment PLR values; (3) studies with pathologic

1  
2  
3  
4 response status or survival outcomes after neoadjuvant treatment, including pCR,  
5 disease-free survival (DFS), overall survival (OS), OR and HR with 95% confidence  
6 intervals (CI). The exclusion criteria were as follows: (1) Abstracts, reviews, case  
7 studies, letters, non-human subject studies and non-English language studies; (2)  
8 breast cancer participants did not receive neoadjuvant treatment; (3) Research with  
9 insufficient data.  
10  
11  
12  
13  
14

### 15 **Data extraction and quality assessment**

16  
17 Two researchers independently reviewed the available literature and extracted  
18 data as follows: (1) study details: first author, country, publication year, study design,  
19 study period, sample size, median age, outcomes, follow-up time; (2)  
20 clinicopathologic parameters: subtype of BC, cut-off value, cut-off method, numbers  
21 in high and low PLR groups stratified by age, histologic type, tumor grade, T stage,  
22 lymph node metastasis, ki-67 value, hormone receptor status, HER-2 status,  
23 molecular subtype, menopausal status; (3) treatment outcomes: numbers in pCR and  
24 non-pCR groups, HR with 95% CIs of DFS and OS.  
25  
26  
27  
28  
29  
30  
31  
32

33 We used the Newcastle Ottawa Scale (NOS) rating scale to assess the quality of  
34 the included studies. The studies was scored from 0 to 9 points, based on the object  
35 selection, comparability, outcome, and exposure. High-quality literature should have a  
36 score of  $\geq 6$ . If the two researchers had disagreement, a third researcher was invited to  
37 achieve a consistent result.  
38  
39  
40  
41  
42

### 43 **Statistical analysis**

44  
45 All analyses were performed using Stata software version 12.0 (Stata  
46 Corporation, College Station, TX, USA), using two-sided P values. Odds ratio (OR)  
47 with corresponding 95% CI was used to evaluate the association between PLR and  
48 pCR rate, clinicopathological characteristics. Hazard ratios (HR) with corresponding  
49 95% CI was used as an effect measure to assess the relationship between PLR and  
50 DFS, OS. Then the log OR, log HR, and corresponding standard error (SE) were used  
51 to compute pooled effect measures. Moreover, stratified analyses were also performed  
52 based on ethnicity, cut-off value, cut-off method and sub-type of breast cancer. Both  
53  
54  
55  
56  
57  
58  
59  
60

1  
2  
3  
4 the Cochran's Q statistic and the  $I^2$  statistic were calculated to estimate heterogeneity  
5 among the included studies.<sup>29 30</sup> If the P value of the Q test was  $<0.10$  or  $I^2 >50\%$ ,  
6 indicating significant heterogeneity across studies, the pooled OR and HR were  
7 calculated by the random effects model (the DerSimonian and Laird method).<sup>31</sup>  
8 Otherwise, fixed effects model (the Mantel–Haenszel method) was used.<sup>31</sup> Publication  
9 bias was evaluated using Funnel plots and Egger's linear regression test. Sensitivity  
10 analyses were performed by omitting each single study to show the influence of the  
11 individual data set to the pooled results.  $P < 0.05$  was considered statistically  
12 significant.  
13  
14  
15  
16  
17  
18  
19  
20  
21

## 22 **Results**

### 23 **Study characteristics**

24  
25  
26 As shown in the flow diagram (Figure S1), 176 research articles were identified  
27 in the preliminary search. After reviewing the titles, abstracts and full texts, 154  
28 studies were excluded according to the search criteria and 22 studies were finally  
29 included in the meta-analysis.<sup>22 25 26 28 32-41</sup> The main characteristics of the included  
30 studies are summarized in Table S1. The 22 enrolled studies containing 5533 BC  
31 patients were published between 2016 and 2022 with the sample size ranging from 55  
32 to 980. 11 studies were carried out in Asian countries (China and Japan) and the other  
33 11 studies were conducted in Caucasian countries (Turkey, America, Spain, Italy,  
34 France and Morocco). All studies were retrospective, with study period ranging from  
35 1996 – 2022. The follow-up time ranged from 3.4 to 124.8 months in these studies,  
36 with NOS scores of 6 – 8 points. Most of the study subjects contained all breast  
37 cancer types, and included two studies of inflammatory breast cancer, two studies of  
38 triple negative breast cancer and one study of Luminal B breast cancer. All patients  
39 received standardized neoadjuvant chemotherapy and surgery, with the median age  
40 ranged from 45 to 71 years old. Cut-off values for PLR were provided in 21 studies, 6  
41 of which were derived from previous studies and another 15 were obtained from ROC  
42 curves.  
43  
44  
45  
46  
47  
48  
49  
50  
51  
52  
53  
54  
55  
56  
57  
58  
59  
60

### **Association between PLR and pCR of BC**

1  
2  
3  
4 19 studies with 4301 patients reported the correlation between the PLR and  
5 pCR.<sup>22 26 28 32-40 42-48</sup> Our results indicate that high PLR level was significantly  
6 associated with low pCR rate (HR: 0.77, 95% CI: 0.67-0.88,  $p < 0.001$ ), and  
7 significant heterogeneity was observed ( $I^2=75.80\%$ ,  $P_h < 0.001$ , Table 1, Figure 1).  
8 When stratified analyses were performed based on ethnicity, the results showed that  
9 Caucasian studies were still statistically significant (HR: 0.77, 95% CI: 0.68-0.88,  $p <$   
10  $0.001$ ;  $I^2=61.60\%$ ,  $P_h = 0.004$ ). On the other hand, there was no statistically  
11 significance observed for PLR and pCR among the Asian studies (HR: 0.83, 95% CI:  
12 0.58-1.17,  $p = 0.288$ ;  $I^2= 85.00\%$ ,  $P_h < 0.001$ ). Subgroup analysis were also  
13 performed to determine the effects of cut-off values and methods on the outcomes.  
14 Studies with cut-off value  $\geq 150$  showed a significant association between the PLR  
15 and pCR (HR: 0.78, 95% CI: 0.67-0.91,  $p = 0.001$ ;  $I^2= 68.20\%$ ,  $P_h = 0.001$ ), while  
16 cut-off values  $< 150$  did not achieve statistical significance (HR: 0.80, 95% CI:  
17 0.59-1.10,  $p = 0.172$ ;  $I^2= 82.90\%$ ,  $P_h < 0.001$ ). On the other hand, we observed  
18 statistically significant relationship between PLR and pCR, no matter the cut-off  
19 values obtained from ROC curves (HR: 0.72, 95% CI: 0.57-0.92,  $p = 0.008$ ;  $I^2=$   
20  $81.10\%$ ,  $P_h < 0.001$ ) or previous studies (HR: 0.86, 95% CI: 0.78-0.94,  $p = 0.001$ ;  $I^2=$   
21  $39.30\%$ ,  $P_h = 0.144$ ). Further subgroup analysis was also conducted by tumor  
22 subtypes. In the all types group (HR: 0.76, 95% CI: 0.64-0.89,  $p = 0.001$ ;  $I^2= 74.00\%$ ,  
23  $P_h < 0.001$ ) and inflammatory breast cancer group (HR: 0.83, 95% CI: 0.70-0.97,  $p =$   
24  $0.021$ ;  $I^2= 0.00\%$ ,  $P_h = 0.368$ ), statistical significance were noted between PLR and  
25 pCR. In comparison, studies in the triple negative breast cancer group did not show a  
26 significant association (HR: 0.91, 95% CI: 0.26-3.21,  $p = 0.885$ ;  $I^2= 94.70\%$ ,  $P_h <$   
27  $0.001$ ).

### 51 **Association between PLR and survival of BC**

52  
53 5 studies with 912 patients evaluated the relationship between OS and PLR.<sup>25 35</sup>  
54  
55 <sup>40 43 49</sup> The pooled results demonstrated that high PLR was significantly associated  
56 with poor OS in patients with breast cancer (HR: 1.90, 95% CI: 1.39-2.59,  $p < 0.001$ ;  
57  $I^2= 7.40\%$ ,  $P_h = 0.365$ ) (Table 2, Figure S2). Subgroup analyses by ethnicity showed  
58  
59  
60



1  
2  
3  
4 that PLR had significantly prognostic value for OS both in Asian and Caucasian  
5 populations (HR: 2.00, 95% CI: 1.19-3.38,  $p = 0.009$ ,  $I^2 = 56.70\%$ ,  $P_h = 0.128$ ; HR:  
6 1.85, 95% CI: 1.26-2.71,  $p = 0.002$ ,  $I^2 = 0.0\%$ ,  $P_h = 0.378$ ). Moreover, when stratified  
7  
8 by subtypes of breast cancer, the results indicated that the prognostic effect of PLR on  
9  
10 OS was similarly significant among the all types group (HR: 1.92, 95% CI: 1.31-2.83,  
11  
12  $p = 0.001$ ;  $I^2 = 15.30\%$ ,  $P_h = 0.307$ ) and inflammatory breast cancer group (HR: 1.86,  
13  
14 95% CI: 1.11-3.11,  $p = 0.018$ ;  $I^2 = 48.60\%$ ,  $P_h = 0.163$ ). Furthermore, when  
15  
16 considering different cut-off value methods, high PLR significantly predicted shorter  
17  
18 OS when cut-off values were conducted by ROC (HR: 2.15, 95% CI: 1.44-3.22,  $p <$   
19  
20  $0.001$ ;  $I^2 = 19.80\%$ ,  $P_h = 0.288$ ), but did not show significantly prognostic efficiency in  
21  
22 the group of cut-off value obtained from previous studies (HR: 1.58, 95% CI:  
23  
24 0.97-2.56,  $p = 0.065$ ;  $I^2 = 0.0\%$ ,  $P_h = 0.345$ ).

25  
26  
27 7 studies with 1887 patients analyzed the relationship between the PLR and  
28  
29 DFS.<sup>25 26 35 37 38 43 50</sup> The pooled results indicated that DFS was significantly shorter in  
30  
31 high PLR group than in low PLR group (HR: 1.97, 95% CI: 1.56-2.50,  $p < 0.001$ ;  $I^2 =$   
32  
33  $0.0\%$ ,  $P_h = 0.460$ ) (Table 2, Figure S3). We also performed further subgroup analysis  
34  
35 based on ethnicity, subtypes of BC and cut-off value methods. Compared with the  
36  
37 overall results, no significant changes were identified after stratification, and no  
38  
39 significant heterogeneity was observed.

#### 40 41 **Association between PLR and clinicopathological parameters of BC**

42  
43 To analyze the impact of PLR on the clinicopathological characteristics in breast  
44  
45 cancer patients, we pooled the results from included studies according to age,  
46  
47 histologic type, tumor grade, T stage, lymph node metastasis, ki-67 value, hormone  
48  
49 receptor status, HER-2 status, molecular subtype, menopausal status. As shown in  
50  
51 Table S2, young patients and pre-menopausal status patients had significantly higher  
52  
53 PLR value than old or post-menopausal status patients (OR: 0.86, 95% CI: 0.79-0.93,  
54  
55  $p < 0.001$ ,  $I^2 = 40.60\%$ ,  $P_h = 0.096$ ; OR: 0.83, 95% CI: 0.76-0.90,  $p < 0.001$ ,  $I^2 =$   
56  
57  $50.80\%$ ,  $P_h = 0.087$ ). In comparison to low PLR groups, the high PLR groups had a  
58  
59 higher T stage (OR: 1.05, 95% CI: 1.00-1.11,  $p = 0.035$ ;  $I^2 = 70.30\%$ ,  $P_h = 0.005$ ).



Whereas the other results indicated no significant association of PLR with histologic type, tumor grade, lymph node metastasis, ki-67 value, hormone receptor status, HER-2 status and molecular subtype.

### **Sensitivity analysis**

Sensitivity analysis results showed that the pooled ORs are not altered materially when deleted a single study each time. The sensitivity analysis plot presented that all the included studies are near the central line with no clear deviation, suggesting that our results were statistically robust (Figure 2A).

### **Publication bias**

Begg's funnel plot and Egger's test were used to evaluate the publication bias of the literature. The funnel plots did not reveal obvious evidence of asymmetry (Figure 2B). Then, the Egger's test still did not show any significant statistical evidence of publication bias ( $P = 0.862$ ).

### **Discussion**

This meta-analysis assessed the association between pretreatment PLR with pCR and survival on 5533 breast cancer patients treated with neoadjuvant chemotherapy. Our results demonstrate that elevated PLR value appears to correlate with low pCR rate and poor prognosis, including OS and DFS. Consistent with previous studies, our findings suggest that PLR could be a significant prognostic marker for breast cancer patients who received NACT.<sup>26 35 37 40 43</sup>

Neoadjuvant chemotherapy is increasingly used to treat locally advanced breast cancer, so as to reduce the size of tumors and increase the possibility of breast-conserving surgery.<sup>51</sup> However, there are no ready-made and reliable biomarkers to predict the response to NACT. In recent years, many studies have focused on the relationship between inflammation related biomarkers and tumors. These studies showed that tumor related inflammation, which may contribute to the tumor growth, invasion and metastasis, was associated with the occurrence, development, and prognosis of cancers.<sup>52 53</sup> Common components in peripheral blood, such as neutrophils, monocytes, platelets, and lymphocytes, are closely related to the

1  
2  
3  
4 biological behavior of tumor cells.<sup>54</sup> Numerous studies have shown that lymphocytes  
5 can inhibit tumor progression and metastasis, which play an important role in tumor  
6 immune monitoring.<sup>55 56</sup> Lymphopenia is commonly seen in immune system defects  
7 caused by tumor cells. The possible mechanism is that lymphocytes can control  
8 growth of tumor cells through cytotoxicity and induction tumor cell apoptosis.<sup>57</sup>  
9  
10 Another research showed that lymphocytes could inhibit tumor cell growth by  
11 secreting interferon-gamma and tumor necrosis factor- $\alpha$ .<sup>58</sup> Studies have found that the  
12 more infiltrating lymphocyte by tumor, the better prognosis of breast cancer  
13 patients.<sup>59 60</sup> In addition, previous studies have reported that tumor-infiltrating  
14 lymphocyte can be used as a predictor of the response to neoadjuvant and adjuvant  
15 chemotherapy in breast cancer patients.<sup>61 62</sup> On the other hand, platelets, as key actors  
16 in the process of inflammation, play important roles in tumor progression. Firstly,  
17 platelets can protect tumor cells in peripheral blood from high flow shear stress and  
18 immune attacks by aggregating and adhering to tumor cells.<sup>63</sup> Secondly, platelets  
19 could contribute tumor progression by secreting various cell growth factors, which  
20 could stimulate tumor angiogenesis and growth.<sup>64-66</sup> Thirdly, platelets could induce  
21 epithelial mesenchymal transition and impede cell-mediated immune clearance  
22 effects, leading to the tumor cell metastasis.<sup>67</sup> Therefore, high platelet count may be  
23 associated with poor prognosis of breast cancer patients.  
24  
25  
26  
27  
28  
29  
30  
31  
32  
33  
34  
35  
36  
37  
38  
39  
40

41 Platelet-to-lymphocyte ratio (PLR), as a commonly used indicator of  
42 inflammatory status, could predict the prognosis of variant tumors. Elevated value of  
43 PLR, with a high platelet count and/or low lymphocyte count, often lead to a low  
44 antitumor activity and poor prognosis. Previous studies showed that PLR is  
45 significantly related to the survival of colorectal cancer, gastric cancer and liver  
46 cancer.<sup>68-70</sup> Gunduz et al. showed that elevated PLR value was associated with poor  
47 DFS in breast cancer.<sup>71</sup> However, Ulas et al. reported that there is no association  
48 between PLR and DFS or OS in breast cancer.<sup>72</sup> What's more, when subgroup  
49 analysis by different molecular types of breast cancer was performed, Koh et al. found  
50 that elevated PLR could result in an increased risk of mortality in ER+ and HER2+  
51  
52  
53  
54  
55  
56  
57  
58  
59  
60

1  
2  
3  
4 group but not in ER- and HER2+ group.<sup>73</sup> Studies focused on the relationship  
5 between PLR and metastatic breast cancer could achieve positive results easily.<sup>74</sup>  
6  
7 However, the predictive efficacy of PLR in early stage breast cancer was limited. The  
8 possible explanation is that inflammatory reaction may not be so obvious in early  
9 breast cancer. Recently, many studies have be devoted to explore whether PLR could  
10 be a predictor for locally advanced breast cancer treated with neoadjuvant  
11 chemotherapy. Tekyol et al. found that PLR value was associated with chemotherapy  
12 sensitivity and could serve as a predictive marker of the therapeutic effect of NACT  
13 in breast cancer.<sup>34</sup> Similarly, Ouissam and Ma showed that PLR was associated with  
14 OS and DFS in breast cancer treated with NACT.<sup>43 75</sup> However, some other studies  
15 reported that the PLR value has no significant predictive effect on pCR rate, DFS or  
16 OS in breast cancer treated with NACT.<sup>25 49</sup> So far, the above studies indicated that  
17 the prognostic role and clinical value of PLR in locally advanced breast cancer with  
18 NACT is still controversial.

19  
20  
21  
22  
23  
24  
25  
26  
27  
28  
29  
30  
31 We conducted this meta-analysis to explore the predictive value of PLR in breast  
32 cancer patients treated with NACT. Our results indicate that high PLR level was  
33 significantly associated with low pCR rate (HR: 0.77, 95% CI: 0.67-0.88,  $p < 0.001$ ).  
34 This finding is consistent with previous studies confirming that PLR may act as a  
35 significant marker for predicting the effective of NACT in BC patients.<sup>33 34 37</sup> In  
36 subgroup analysis, we found that PLR was only significantly associated with  
37 Caucasian patients but not Asian patients. The possible explanations were the  
38 differences in baseline PLR values due to different genetic backgrounds, different  
39 chemotherapy regimens and doses. What's more, the heterogeneity of the Asian group  
40 is also more obvious than that of the Caucasian group, which may lead to no  
41 significance in the Asian group. Previous studies reported that high PLR value may  
42 indicate a lower pCR rate and poor prognosis of TNBC patients.<sup>46</sup> Subgroup analysis  
43 by tumor subtypes in this meta-analysis including two studies showed no significant  
44 association between PLR and pCR in the triple negative breast cancer group. One of  
45 the reasons for the negative statistical significance is the small number of included  
46  
47  
48  
49  
50  
51  
52  
53  
54  
55  
56  
57  
58  
59  
60

1  
2  
3  
4 studies. On the other hand, TNBC is a heterogeneous disease that includes several  
5 subtypes of tumors. There are differences in prognosis among the different subtypes  
6 of TNBC.<sup>44</sup> Further more research is needed to evaluate the predictive value of PLR  
7 in TNBC treated with NACT. How to identify the optimal critical value for the  
8 clinical application of PLR may be a major concern for doctors. Unfortunately, this  
9 value has not been determined for predicting the efficacy and prognosis of  
10 neoadjuvant therapy in breast cancer patients. Because of the different phase of  
11 evaluation of the blood sample or basic blood values of different populations, the  
12 cutoff values of PLR were varied. Some studies reported that high PLR was  
13 associated with poor prognosis using a cut-off value of 292 and 200,<sup>76 77</sup> while other  
14 studies did not find significant association between PLR and prognosis of breast  
15 cancer patients with a cut-off value of 161, 107, and 160, respectively.<sup>22 37 78</sup> Different  
16 studies use variant cut-off values from different methods. Traditionally, we believe  
17 that the ROC curve is the most suitable for getting the optimal cutoff value.<sup>33 43 46-48</sup>  
18 However, other studies have also achieved significant results using the cut-off values  
19 from previous studies.<sup>26 28 34</sup> We performed subgroup analysis to determine the effects  
20 of cut-off values and methods on the outcomes. The results showed statistically  
21 significant relationship between PLR and pCR, no matter the cut-off values obtained  
22 from ROC curves or previous studies. This result indicated that the source and  
23 method of optimal cut-off values are not the key influence factors for PLR acting as a  
24 predictive factor for breast cancer. On the other hand, our results also showed that  
25 studies with cut-off value  $\geq 150$  showed a significant association between the PLR  
26 and pCR, while cut-off values  $< 150$  did not achieve statistical significance. Therefore,  
27 a higher cut-off value for PLR may increase its predictive value for breast cancer  
28 patients. However, a higher cut-off value may lead to the omission of a large number  
29 of patient and reduce its predictive sensitivity in clinical practice.<sup>79</sup> Therefore, further  
30 researches are needed to determine the optimal cut-off value of PLR for future  
31 individualized treatment.

32  
33  
34  
35  
36  
37  
38  
39  
40  
41  
42  
43  
44  
45  
46  
47  
48  
49  
50  
51  
52  
53  
54  
55  
56  
57  
58  
59 We also evaluated the association between PLR and prognosis of breast cancer  
60

1  
2  
3  
4 patients treated with NACT. Zhang et al. conducted a meta-analysis which including  
5 5542 breast cancer patients with different stages and indicated that high PLR level is  
6 significantly associated with poor OS and DFS of breast cancer patients.<sup>80</sup> However,  
7 the results were inconsistent when evaluated the prognosis value for NACT.  
8 Christophe et al. and Jiang et al. reported that the PLR value has no significant effect  
9 on DFS or OS in breast cancer treated with NACT.<sup>25 49</sup> Contradictory results made by  
10 Ileana and Ouissam showed that PLR was associated with OS and DFS in breast  
11 cancer treated with NACT.<sup>35 43</sup> In our study, the pooled results demonstrated that high  
12 PLR was significantly associated with poor OS and PFS in patients with breast  
13 cancer. Subgroup analyses by ethnicity, method and subtype showed the same results  
14 with no significant heterogeneity. The consistency of this result may be due to the fact  
15 that the included patients are all local advanced stage patients who have received  
16 NACT. Therefore, further studies are needed to evaluate the prognostic value of PLR  
17 in different clinical stages and molecular subtypes of breast cancer. What's more, this  
18 meta-analysis also explored the association between PLR and clinicopathological  
19 characteristics. Our results indicated that high PLR level was more common in young  
20 women and patients with premenopausal status. One possible explanation is that  
21 young people may have more lymphocyte and platelet reserves and a more sensitive  
22 inflammatory state. On the other hand, we also found that elevated PLR is associated  
23 with tumor stage, which indicated that PLR may be involved in the occurrence and  
24 progression of breast cancer. Some exploration experiments are needed to prove the  
25 mechanisms between PLR and breast cancer.

26  
27  
28  
29  
30  
31  
32  
33  
34  
35  
36  
37  
38  
39  
40  
41  
42  
43  
44  
45  
46  
47  
48  
49  
50  
51  
52  
53  
54  
55  
56  
57  
58  
59  
60  
There are still several limitations to be considered in this meta-analysis. First, All  
of the studies included were retrospective, and some studies have incomplete data,  
which may have some impact on the final results. Second, the cut-off values of PLR  
were inconsistent among the studies, some of them determined the optimum PLR  
value according to the previous studies instead of using ROC curve. Even if using  
ROC curve, the different phase of evaluation of the blood sample or basic blood  
values of different populations may also result in different cutoff values, which may

1  
2  
3  
4 lead to the introduction of selection bias in the meta-analysis. Third, breast cancer is a  
5  
6 heterogeneous tumor with many subtypes. The biological behavior, malignant degree  
7  
8 and immune response of different subtypes were varied. Variant molecular subtypes  
9  
10 of breast cancer respond differently to neoadjuvant therapy, and the heterogeneity of  
11  
12 the results may be affected for the lacking of relevant information about molecular  
13  
14 typing in most studies. Finally, PLR may be influenced by some factors, including  
15  
16 bacterial and viral infections, nutritional state and history of medication. These  
17  
18 intrinsic factors were not statistically available and uncontrollable, which were  
19  
20 unavoidable sources of heterogeneity in this meta-analysis. Further more studies were  
21  
22 needed to accurately focus on the different subtype of breast cancer and provide more  
23  
24 detailed clinicopathological information for stratified analysis, which may reduce  
25  
26 heterogeneity to some extent.

## 27 28 **Conclusions**

29  
30 This study indicated that PLR level was associated with age, menopausal status  
31  
32 and T stage of breast cancer patients. In addition, high PLR was significantly related  
33  
34 to the low pCR rate, poor OS and PFS of breast cancer patients treated with  
35  
36 neoadjuvant chemotherapy. Therefore, PLR can be used as a potential predictor  
37  
38 biomarker for the efficacy of neoadjuvant chemotherapy. However, further high  
39  
40 quality and well-designed studies with larger samples are needed to identify the  
41  
42 optimal cut-off value of PLR and explore the mechanism of PLR with breast cancer.  
43  
44  
45  
46  
47  
48  
49  
50  
51  
52  
53  
54  
55  
56  
57  
58  
59  
60

## Abbreviations

HR: hazard ratio; OR: odds ratio; 95% CI: 95% confidence interval; Ph: p values of Q test for heterogeneity test; OS: overall survival; DFS: disease-free survival. PLR: platelet-lymphocyte ratio; BC: breast cancer; NACT: neoadjuvant chemotherapy; ROC: receiver operating characteristic curve; NOS: Newcastle-Ottawa Scale;

## Declarations

### Ethics approval and consent to participate

All the data supporting our findings in this paper were freely downloaded from the PubMed, EMBASE, Web of Science databases and the Cochrane Library. No ethical approval or written informed consent for participation was required.

### Consent for publication

Not applicable.

### Availability of data and materials

All data for this study are publicly available and are ready for the public to download at no cost from the official websites of the PubMed, EMBASE, Web of Science databases and the Cochrane Library. There is no need to have the formal permission to use data for this study. The sources and data robustness have been described in the section of "Methods".

### Competing interests

The authors declare that they have no competing interests.

### Funding

The work was supported by Medical Talent Program Foundation of Health and Family Planning Commission of Nantong (MA202009), Natural Science Foundation

1  
2  
3  
4 of Jiangsu Province (BK20191208).  
5  
6

7  
8 **Author Contributions**

9  
10 XQ, JC and XZ were involved in drafting the manuscript. SW and JN made  
11  
12 contributions to the concepts, acquisition and analysis of the data. LS was involved in  
13  
14 acquisition of data and preparing the Figs. LY and CJ designed and revised the  
15  
16 manuscript. All authors have read and approved the final manuscript.  
17

18  
19 **Acknowledgements**

20  
21 Not applicable.  
22  
23

24  
25 **Patient and Public Involvement**

26  
27 None  
28  
29  
30  
31  
32  
33  
34  
35  
36  
37  
38  
39  
40  
41  
42  
43  
44  
45  
46  
47  
48  
49  
50  
51  
52  
53  
54  
55  
56  
57  
58  
59  
60



## References

1. Siegel RL, Miller KD, Jemal A. Cancer statistics, 2020. *CA Cancer J Clin* 2020;70(1):7-30.
2. Fan L, Strasser-Weippl K, Li JJ, et al. Breast cancer in China. *Lancet Oncol* 2014;15(7):e279-89.
3. Wang M, Hou L, Chen M, et al. Neoadjuvant Chemotherapy Creates Surgery Opportunities For Inoperable Locally Advanced Breast Cancer. *Sci Rep* 2017;7:44673.
4. Sinacki M, Badzio A, Welnicka-Jaskiewicz M, et al. Pattern of care in locally advanced breast cancer: focus on local therapy. *Breast* 2011;20(2):145-50.
5. Kesson EM, Allardice GM, George WD, et al. Effects of multidisciplinary team working on breast cancer survival: retrospective, comparative, interventional cohort study of 13 722 women. *BMJ* 2012;344:e2718.
6. Wolmark N, Wang J, Mamounas E, et al. Preoperative chemotherapy in patients with operable breast cancer: nine-year results from National Surgical Adjuvant Breast and Bowel Project B-18. *J Natl Cancer Inst Monogr* 2001(30):96-102.
7. Nam K, Eisenbrey JR, Stanczak M, et al. Monitoring Neoadjuvant Chemotherapy for Breast Cancer by Using Three-dimensional Subharmonic Aided Pressure Estimation and Imaging with US Contrast Agents: Preliminary Experience. *Radiology* 2017;285(1):53-62.
8. Savaridas SL, Sim YT, Vinnicombe SJ, et al. Are baseline ultrasound and mammographic features associated with rates of pathological complete response in patients receiving neoadjuvant chemotherapy for breast cancer? *Cancer Imaging* 2019;19(1):67.
9. He Z, Song A, Zhang Z, et al. Comparative efficacy of non-pharmacological adjuvant therapies for quality of life in the patients with breast cancer receiving chemo- or radio-therapy: A protocol for systematic review and Bayesian network meta-analysis. *Medicine (Baltimore)* 2018;97(35):e12096.
10. Mieog JS, van der Hage JA, van de Velde CJ. Preoperative chemotherapy for women with operable breast cancer. *Cochrane Database Syst Rev* 2007;2007(2):CD005002.
11. von Minckwitz G, Untch M, Blohmer JU, et al. Definition and impact of pathologic complete response on prognosis after neoadjuvant chemotherapy in various intrinsic breast cancer subtypes. *J Clin Oncol* 2012;30(15):1796-804.
12. Gianni L, Pienkowski T, Im YH, et al. Efficacy and safety of neoadjuvant pertuzumab and trastuzumab in women with locally advanced, inflammatory, or early HER2-positive breast cancer (NeoSphere): a randomised multicentre, open-label, phase 2 trial. *Lancet Oncol* 2012;13(1):25-32.
13. Cortazar P, Zhang L, Untch M, et al. Pathological complete response and long-term clinical benefit in breast cancer: the CTNeoBC pooled analysis. *Lancet* 2014;384(9938):164-72.
14. Xu W, Chen X, Deng F, et al. Predictors of Neoadjuvant Chemotherapy Response in Breast Cancer: A Review. *Onco Targets Ther* 2020;13:5887-99.
15. Andre F, Dieci MV, Dubsy P, et al. Molecular pathways: involvement of immune pathways in the therapeutic response and outcome in breast cancer. *Clin Cancer Res* 2013;19(1):28-33.
16. Bianchini G, Gianni L. The immune system and response to HER2-targeted treatment in breast cancer. *Lancet Oncol* 2014;15(2):e58-68.
17. Aziz MH, Sideras K, Aziz NA, et al. The Systemic-immune-inflammation Index Independently Predicts Survival and Recurrence in Resectable Pancreatic Cancer and its Prognostic Value

- 1  
2  
3 Depends on Bilirubin Levels: A Retrospective Multicenter Cohort Study. *Ann Surg*  
4 2019;270(1):139-46.  
5  
6 18. Tomita M, Shimizu T, Ayabe T, et al. Preoperative neutrophil to lymphocyte ratio as a prognostic  
7 predictor after curative resection for non-small cell lung cancer. *Anticancer Res*  
8 2011;31(9):2995-8.  
9  
10 19. Ishizuka M, Nagata H, Takagi K, et al. Combination of platelet count and neutrophil to lymphocyte  
11 ratio is a useful predictor of postoperative survival in patients with colorectal cancer. *Br J*  
12 *Cancer* 2013;109(2):401-7.  
13  
14 20. Rossi L, Santoni M, Crabb SJ, et al. High neutrophil-to-lymphocyte ratio persistent during first-line  
15 chemotherapy predicts poor clinical outcome in patients with advanced urothelial cancer.  
16 *Ann Surg Oncol* 2015;22(4):1377-84.  
17  
18 21. Luo G, Guo M, Liu Z, et al. Blood neutrophil-lymphocyte ratio predicts survival in patients with  
19 advanced pancreatic cancer treated with chemotherapy. *Ann Surg Oncol* 2015;22(2):670-6.  
20  
21 22. Losada B, Guerra JA, Malon D, et al. Pretreatment neutrophil/lymphocyte, platelet/lymphocyte,  
22 lymphocyte/monocyte, and neutrophil/monocyte ratios and outcome in elderly breast  
23 cancer patients. *Clin Transl Oncol* 2019;21(7):855-63.  
24  
25 23. Kim HY, Kim TH, Yoon HK, et al. The Role of Neutrophil-lymphocyte Ratio and Platelet-lymphocyte  
26 Ratio in Predicting Neoadjuvant Chemotherapy Response in Breast Cancer. *J Breast Cancer*  
27 2019;22(3):425-38.  
28  
29 24. Lusho S, Durando X, Mouret-Reynier MA, et al. Platelet-to-Lymphocyte Ratio Is Associated With  
30 Favorable Response to Neoadjuvant Chemotherapy in Triple Negative Breast Cancer: A Study  
31 on 120 Patients. *Front Oncol* 2021;11:678315.  
32  
33 25. Van Berckelaer C, Vermeiren I, Vercauteren L, et al. The Evolution and Prognostic Role of  
34 Tumour-Infiltrating Lymphocytes and Peripheral Blood-Based Biomarkers in Inflammatory  
35 Breast Cancer Patients Treated with Neoadjuvant Chemotherapy. *Cancers (Basel)*  
36 2021;13(18).  
37  
38 26. Asano Y, Kashiwagi S, Onoda N, et al. Platelet-Lymphocyte Ratio as a Useful Predictor of the  
39 Therapeutic Effect of Neoadjuvant Chemotherapy in Breast Cancer. *PLoS One*  
40 2016;11(7):e0153459.  
41  
42 27. Peng Y, Chen R, Qu F, et al. Low pretreatment lymphocyte/monocyte ratio is associated with the  
43 better efficacy of neoadjuvant chemotherapy in breast cancer patients. *Cancer Biol Ther*  
44 2020;21(2):189-96.  
45  
46 28. Cuello-Lopez J, Fidalgo-Zapata A, Lopez-Agudelo L, et al. Platelet-to-lymphocyte ratio as a  
47 predictive factor of complete pathologic response to neoadjuvant chemotherapy in breast  
48 cancer. *PLoS One* 2018;13(11):e0207224.  
49  
50 29. Cochran WG. The comparison of percentages in matched samples. *Biometrika*  
51 1950;37(3-4):256-66.  
52  
53 30. Higgins JP, Thompson SG, Deeks JJ, et al. Measuring inconsistency in meta-analyses. *BMJ*  
54 2003;327(7414):557-60.  
55  
56 31. Mantel N, Haenszel W. Statistical aspects of the analysis of data from retrospective studies of  
57 disease. *J Natl Cancer Inst* 1959;22(4):719-48.  
58  
59 32. Graziano V, Grassadonia A, Iezzi L, et al. Combination of peripheral neutrophil-to-lymphocyte ratio  
60 and platelet-to-lymphocyte ratio is predictive of pathological complete response after

- neoadjuvant chemotherapy in breast cancer patients. *Breast* 2019;44:33-38.
33. Sahin AB, Cubukcu E, Ocak B, et al. Low pan-immune-inflammation-value predicts better chemotherapy response and survival in breast cancer patients treated with neoadjuvant chemotherapy. *Sci Rep* 2021;11(1):14662.
34. Kaytaz Tekyol K, Gurleyik G, Aktas A, et al. Pathological Complete Response to Neoadjuvant Chemotherapy in Patients With Breast Cancer: The Relationship Between Inflammatory Biomarkers and Molecular Subtypes. *Cureus* 2021;13(4):e14774.
35. Corbeau I, Thezenas S, Maran-Gonzalez A, et al. Inflammatory Blood Markers as Prognostic and Predictive Factors in Early Breast Cancer Patients Receiving Neoadjuvant Chemotherapy. *Cancers (Basel)* 2020;12(9).
36. Eren T, Karacin C, Ucar G, et al. Correlation between peripheral blood inflammatory indicators and pathologic complete response to neoadjuvant chemotherapy in locally advanced breast cancer patients. *Medicine (Baltimore)* 2020;99(22):e20346.
37. Hu Y, Wang S, Ding N, et al. Platelet/Lymphocyte Ratio Is Superior to Neutrophil/Lymphocyte Ratio as a Predictor of Chemotherapy Response and Disease-free Survival in Luminal B-like (HER2(-)) Breast Cancer. *Clin Breast Cancer* 2020;20(4):e403-e09.
38. Ma Y, Zhang J, Chen X. Lymphocyte-to-Monocyte Ratio is Associated with the Poor Prognosis of Breast Cancer Patients Receiving Neoadjuvant Chemotherapy. *Cancer Manag Res* 2021;13:1571-80.
39. Alan O, Akin Telli T, Aktas B, et al. Is insulin resistance a predictor for complete response in breast cancer patients who underwent neoadjuvant treatment? *World J Surg Oncol* 2020;18(1):242.
40. Jiang C, Lu Y, Zhang S, et al. Systemic Immune-Inflammation Index Is Superior to Neutrophil to Lymphocyte Ratio in Prognostic Assessment of Breast Cancer Patients Undergoing Neoadjuvant Chemotherapy. *Biomed Res Int* 2020;2020:7961568.
41. Acikgoz O, Yildiz A, Bilici A, et al. Pretreatment platelet-to-lymphocyte ratio and neutrophil-to-lymphocyte ratio as a predictor of pathological complete response to neoadjuvant chemotherapy in patients with breast cancer: single center experience from Turkey. *Anticancer Drugs* 2022;33(10):1150-55.
42. Kim R, Kawai A, Wakisaka M, et al. Immune factors associated with the pathological and therapeutic effects of preoperative chemotherapy in patients with breast cancer. *Transl Oncol* 2021;14(1):100927.
43. Al Jarroudi O, El Bairi K, Abda N, et al. Neutrophil-to-lymphocyte and platelet-to-lymphocyte ratios as predictors of outcomes in inflammatory breast cancer. *Biomark Med* 2021;15(14):1289-98.
44. Chung WS, Chen SC, Ko TM, et al. An Integrative Clinical Model for the Prediction of Pathological Complete Response in Patients with Operable Stage II and Stage III Triple-Negative Breast Cancer Receiving Neoadjuvant Chemotherapy. *Cancers (Basel)* 2022;14(17).
45. Jin X, Wang K, Shao X, et al. Prognostic implications of the peripheral platelet-to-lymphocyte ratio and neutrophil-to-lymphocyte ratio in predicting pathologic complete response after neoadjuvant chemotherapy in breast cancer patients. *Gland Surg* 2022;11(6):1057-66.
46. Lou C, Jin F, Zhao Q, et al. Correlation of serum NLR, PLR and HALP with efficacy of neoadjuvant chemotherapy and prognosis of triple-negative breast cancer. *Am J Transl Res* 2022;14(5):3240-46.

- 1
- 2
- 3
- 4 47. Yang G, Liu P, Zheng L, et al. Novel peripheral blood parameters as predictors of neoadjuvant
- 5 chemotherapy response in breast cancer. *Front Surg* 2022;9:1004687.
- 6
- 7 48. Acikgoz O, Yildiz A, Bilici A, et al. Pretreatment platelet-to-lymphocyte ratio and
- 8 neutrophil-to-lymphocyte ratio as a predictor of pathological complete response to
- 9 neoadjuvant chemotherapy in patients with breast cancer: single center experience from
- 10 Turkey. *Anticancer Drugs* 2022;33(10):1150-55.
- 11
- 12 49. Jiang C, Zhang S, Qiao K, et al. The Pretreatment Systemic Inflammation Response Index as a
- 13 Useful Prognostic Factor is Better Than Lymphocyte to Monocyte Ratio in Breast Cancer
- 14 Patients Receiving Neoadjuvant Chemotherapy. *Clin Breast Cancer* 2022;22(5):424-38.
- 15
- 16 50. Song D, Li X, Zhang X. Expression and prognostic value of ratios of platelet lymphocyte, neutrophil
- 17 lymphocyte and lymphocyte monocyte in breast cancer patients. *Am J Transl Res*
- 18 2022;14(5):3233-39.
- 19
- 20 51. Mamounas EP, Fisher B. Preoperative (neoadjuvant) chemotherapy in patients with breast cancer.
- 21 *Semin Oncol* 2001;28(4):389-99.
- 22
- 23 52. Wang K, Shen T, Siegal GP, et al. The CD4/CD8 ratio of tumor-infiltrating lymphocytes at the
- 24 tumor-host interface has prognostic value in triple-negative breast cancer. *Hum Pathol*
- 25 2017;69:110-17.
- 26
- 27 53. Liu C, Sun B, Xu B, et al. A panel containing PD-1, IL-2Ralpha, IL-10, and CA15-3 as a biomarker to
- 28 discriminate breast cancer from benign breast disease. *Cancer Manag Res*
- 29 2018;10:1749-61. ]
- 30
- 31 54. Wellenstein MD, Coffelt SB, Duits DEM, et al. Loss of p53 triggers WNT-dependent systemic
- 32 inflammation to drive breast cancer metastasis. *Nature* 2019;572(7770):538-42.
- 33
- 34 55. Dunn GP, Old LJ, Schreiber RD. The immunobiology of cancer immunosurveillance and
- 35 immunoediting. *Immunity* 2004;21(2):137-48.
- 36
- 37 56. Ownby HE, Roi LD, Isenberg RR, et al. Peripheral lymphocyte and eosinophil counts as indicators of
- 38 prognosis in primary breast cancer. *Cancer* 1983;52(1):126-30.
- 39
- 40 57. Hiraoka K, Miyamoto M, Cho Y, et al. Concurrent infiltration by CD8+ T cells and CD4+ T cells is a
- 41 favourable prognostic factor in non-small-cell lung carcinoma. *Br J Cancer* 2006;94(2):275-80.
- 42
- 43 58. Mijic S, Dabrosin C. Platelet Activation In Situ in Breasts at High Risk of Cancer: Relationship with
- 44 Mammographic Density and Estradiol. *J Clin Endocrinol Metab* 2021;106(2):485-500.
- 45
- 46 59. Kotoula V, Chatzopoulos K, Lakis S, et al. Tumors with high-density tumor infiltrating lymphocytes
- 47 constitute a favorable entity in breast cancer: a pooled analysis of four prospective adjuvant
- 48 trials. *Oncotarget* 2016;7(4):5074-87.
- 49
- 50 60. Ibrahim EM, Al-Foheidi ME, Al-Mansour MM, et al. The prognostic value of tumor-infiltrating
- 51 lymphocytes in triple-negative breast cancer: a meta-analysis. *Breast Cancer Res Treat*
- 52 2014;148(3):467-76.
- 53
- 54 61. Seo AN, Lee HJ, Kim EJ, et al. Tumour-infiltrating CD8+ lymphocytes as an independent predictive
- 55 factor for pathological complete response to primary systemic therapy in breast cancer. *Br J*
- 56 *Cancer* 2013;109(10):2705-13.
- 57
- 58 62. Mao Y, Qu Q, Zhang Y, et al. The value of tumor infiltrating lymphocytes (TILs) for predicting
- 59 response to neoadjuvant chemotherapy in breast cancer: a systematic review and
- 60 meta-analysis. *PLoS One* 2014;9(12):e115103.

- cancer: A meta-analysis. *J Cancer* 2018;9(18):3295-302.
64. Egan K, Crowley D, Smyth P, et al. Platelet adhesion and degranulation induce pro-survival and pro-angiogenic signalling in ovarian cancer cells. *PLoS One* 2011;6(10):e26125.
65. Kono SA, Heasley LE, Doebele RC, et al. Adding to the mix: fibroblast growth factor and platelet-derived growth factor receptor pathways as targets in non-small cell lung cancer. *Curr Cancer Drug Targets* 2012;12(2):107-23.
66. Klinger MH, Jelkmann W. Role of blood platelets in infection and inflammation. *J Interferon Cytokine Res* 2002;22(9):913-22.
67. Floris G, Richard F, Hamy AS, et al. Body Mass Index and Tumor-Infiltrating Lymphocytes in Triple-Negative Breast Cancer. *J Natl Cancer Inst* 2021;113(2):146-53.
68. Liu C, Li X. Stage-Dependent Changes in Albumin, NLR, PLR, and AFR are Correlated with Shorter Survival in Patients with Gastric Cancer. *Clin Lab* 2019;65(9).
69. Solak Mekic M, Pedisic I, Sobat H, et al. The Role of Complete Blood Count Parameters in Patients with Colorectal Cancer. *Acta Clin Croat* 2018;57(4):624-29.
70. Suner A, Carr BI, Akkiz H, et al. C-Reactive Protein and Platelet-Lymphocyte Ratio as Potential Tumor Markers in Low-Alpha-Fetoprotein Hepatocellular Carcinoma. *Oncology* 2019;96(1):25-32.
71. Gunduz S, Goksu SS, Arslan D, et al. Factors affecting disease-free survival in patients with human epidermal growth factor receptor 2-positive breast cancer who receive adjuvant trastuzumab. *Mol Clin Oncol* 2015;3(5):1109-12.
72. Ulas A, Avci N, Kos T, et al. Are neutrophil/lymphocyte ratio and platelet/lymphocyte ratio associated with prognosis in patients with HER2-positive early breast cancer receiving adjuvant trastuzumab? *J BUON* 2015;20(3):714-22.
73. Koh CH, Bhoo-Pathy N, Ng KL, et al. Utility of pre-treatment neutrophil-lymphocyte ratio and platelet-lymphocyte ratio as prognostic factors in breast cancer. *Br J Cancer* 2015;113(1):150-8.
74. Koh YW, Lee HJ, Ahn JH, et al. Prognostic significance of the ratio of absolute neutrophil to lymphocyte counts for breast cancer patients with ER/PR-positivity and HER2-negativity in neoadjuvant setting. *Tumour Biol* 2014;35(10):9823-30.
75. Ma R, Wei W, Ye H, et al. A nomogram based on platelet-to-lymphocyte ratio for predicting pathological complete response of breast cancer after neoadjuvant chemotherapy. *BMC Cancer* 2023;23(1):245.
76. Fujimoto Y, Ozawa H, Higuchi T, et al. Improved prognosis of low baseline neutrophil-to-lymphocyte ratio is significantly exclusive in breast cancer patients with high absolute counts of lymphocytes. *Mol Clin Oncol* 2019;10(2):275-84.
77. Hong J, Mao Y, Chen X, et al. Elevated preoperative neutrophil-to-lymphocyte ratio predicts poor disease-free survival in Chinese women with breast cancer. *Tumour Biol* 2016;37(3):4135-42.
78. Marin Hernandez C, Pinero Madrona A, Gil Vazquez PJ, et al. Usefulness of lymphocyte-to-monocyte, neutrophil-to-monocyte and neutrophil-to-lymphocyte ratios as prognostic markers in breast cancer patients treated with neoadjuvant chemotherapy. *Clin Transl Oncol* 2018;20(4):476-83.
79. Jia W, Wu J, Jia H, et al. The Peripheral Blood Neutrophil-To-Lymphocyte Ratio Is Superior to the Lymphocyte-To-Monocyte Ratio for Predicting the Long-Term Survival of Triple-Negative

1  
2  
3 Breast Cancer Patients. *PLoS One* 2015;10(11):e0143061.

- 4 80. Zhang M, Huang XZ, Song YX, et al. High Platelet-to-Lymphocyte Ratio Predicts Poor Prognosis and  
5 Clinicopathological Characteristics in Patients with Breast Cancer: A Meta-Analysis. *Biomed*  
6 *Res Int* 2017;2017:9503025.  
7  
8  
9  
10  
11  
12  
13  
14  
15  
16  
17  
18  
19  
20  
21  
22  
23  
24  
25  
26  
27  
28  
29  
30  
31  
32  
33  
34  
35  
36  
37  
38  
39  
40  
41  
42  
43  
44  
45  
46  
47  
48  
49  
50  
51  
52  
53  
54  
55  
56  
57  
58  
59  
60

For peer review only

**Table 1. Meta-analysis of the association between PLR and pCR of BC with NACT.**

| Factors          | No. of studies | No. of patients | Effects model | OR (95% CI)     | p      | Heterogeneity  |                |
|------------------|----------------|-----------------|---------------|-----------------|--------|----------------|----------------|
|                  |                |                 |               |                 |        | I <sup>2</sup> | P <sub>H</sub> |
| <b>Overall</b>   | 19             | 4301            | Random        | 0.77(0.67-0.88) | <0.001 | 75.80%         | <0.001         |
| <b>Ethnicity</b> |                |                 |               |                 |        |                |                |
| Caucasian        | 11             | 2350            | Random        | 0.77(0.68-0.88) | <0.001 | 61.60%         | 0.004          |
| Asian            | 8              | 1951            | Random        | 0.83(0.58-1.17) | 0.288  | 85.00%         | <0.001         |
| <b>Method</b>    |                |                 |               |                 |        |                |                |
| Previous study   | 6              | 984             | Fixed         | 0.86(0.78-0.94) | 0.001  | 39.30%         | 0.144          |
| ROC              | 12             | 2337            | Random        | 0.72(0.57-0.92) | 0.008  | 81.10%         | <0.001         |
| <b>Subtype</b>   |                |                 |               |                 |        |                |                |
| All              | 14             | 2964            | Random        | 0.76(0.64-0.89) | 0.001  | 74.00%         | <0.001         |
| IBC              | 2              | 177             | Fixed         | 0.83(0.70-0.97) | 0.021  | 0.00%          | 0.368          |
| TNBC             | 2              | 180             | Random        | 0.91(0.26-3.21) | 0.885  | 94.70%         | <0.001         |
| Luminal B        | 1              | 980             | Fixed         | 0.76(0.61-0.94) | 0.013  | —              | —              |
| <b>Cut-off</b>   |                |                 |               |                 |        |                |                |
| <150             | 9              | 2041            | Random        | 0.80(0.59-1.10) | 0.172  | 82.90%         | <0.001         |
| ≥150             | 9              | 1280            | Random        | 0.78(0.67-0.91) | 0.001  | 68.20%         | 0.001          |

**Abbreviations:** ROC: receiver operating characteristic curve; IBC: inflammatory breast cancer; TNBC: triple negative breast cancer; OR: odds ratio; 95% CI: 95% confidence interval;  $P_h$ :  $p$  values of Q test for heterogeneity test.



Table 2. Meta-analysis of the association between PLR and OS, DFS of BC with NACT.

|            | Factors          | No. of studies | No. of patients | Effects model      | HR (95% CI)        | p      | Heterogeneity  |                |
|------------|------------------|----------------|-----------------|--------------------|--------------------|--------|----------------|----------------|
|            |                  |                |                 |                    |                    |        | I <sup>2</sup> | P <sub>H</sub> |
| <b>OS</b>  | <b>Overall</b>   | 5              | 912             | Fixed              | 1.898(1.394-2.586) | <0.001 | 7.40%          | 0.365          |
|            | <b>Ethnicity</b> |                |                 |                    |                    |        |                |                |
|            | Caucasian        | 3              | 383             | Fixed              | 1.845(1.258-2.706) | 0.002  | 0.00%          | 0.378          |
|            | Asian            | 2              | 529             | Fixed              | 2.002(1.187-3.377) | 0.009  | 56.70%         | 0.128          |
|            | <b>Method</b>    |                |                 |                    |                    |        |                |                |
|            | Previous study   | 2              | 281             | Fixed              | 1.579(0.973-2.564) | 0.065  | 0.00%          | 0.345          |
|            | ROC              | 3              | 631             | Fixed              | 2.153(1.442-3.216) | <0.001 | 19.80%         | 0.288          |
|            | <b>Subtype</b>   |                |                 |                    |                    |        |                |                |
|            | All              | 3              | 735             | Fixed              | 1.922(1.306-2.828) | 0.001  | 15.30%         | 0.307          |
|            | IBC              | 2              | 177             | Fixed              | 1.857(1.110-3.109) | <0.018 | 48.60%         | 0.163          |
| <b>DFS</b> | <b>Overall</b>   | 7              | 1887            | Fixed              | 1.972(1.557-2.499) | <0.001 | 0.00%          | 0.460          |
|            | <b>Ethnicity</b> |                |                 |                    |                    |        |                |                |
|            | Caucasian        | 3              | 383             | Fixed              | 2.001(1.415-2.831) | <0.001 | 0.00%          | 0.568          |
|            | Asian            | 4              | 1504            | Fixed              | 1.948(1.409-2.692) | <0.001 | 33.90%         | 0.209          |
|            | <b>Method</b>    |                |                 |                    |                    |        |                |                |
|            | Previous study   | 3              | 458             | Fixed              | 1.990(1.374-2.884) | <0.001 | 0.00%          | 0.513          |
|            | ROC              | 3              | 449             | Fixed              | 2.544(1.614-4.010) | <0.001 | 1.50%          | 0.362          |
|            | <b>Subtype</b>   |                |                 |                    |                    |        |                |                |
|            | All              | 4              | 730             | Fixed              | 2.260(1.576-3.240) | <0.001 | 0.00%          | 0.407          |
|            | IBC              | 2              | 177             | Fixed              | 2.086(1.295-3.361) | 0.003  | 6.50%          | 0.301          |
| Luminal B  | 1                | 980            | Fixed           | 1.576(1.039-2.390) | 0.032              | —      | —              |                |

**Abbreviations:** ROC: receiver operating characteristic curve; IBC: inflammatory breast cancer; HR: hazard ratio; 95% CI: 95% confidence interval;  $P_h$ :  $p$  values of Q test for heterogeneity test.



## Figure legends

**Figure 1: The forest plot between elevated PLR and pCR in BC with NACT. The results showed that high PLR is significantly related to the low pCR rate.**

**Figure 2: Sensitivity analysis and Begg's funnel plot of publication bias test of PLR for pCR in BC with NACT. (A): Sensitivity analysis plot showed that all the included studies are near the central line with no clear deviation, suggesting that the results are statistically robust. (B): The funnel plots did not reveal obvious evidence of asymmetry.**

## Supplemental files

**Table S1. Characteristics of included studies in meta-analysis.**

**Table S2. Meta-analysis of the association between PLR and clinicopathological parameters of BC with NACT.**

**Figure S1: The flow diagram of publications selection.**

**Figure S2: The forest plot between elevated PLR and OS in BC with NACT.**

**Figure S3: The forest plot between elevated PLR and DFS in BC with NACT.**



Figure 1

461x372mm (96 x 96 DPI)

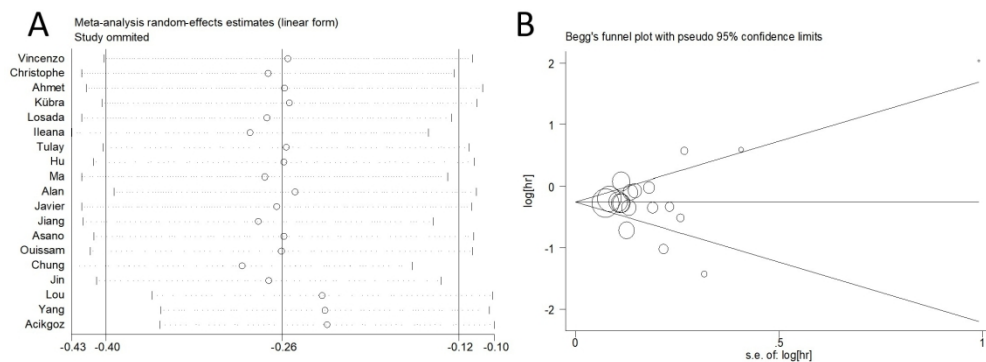

Figure 2

295x111mm (192 x 192 DPI)

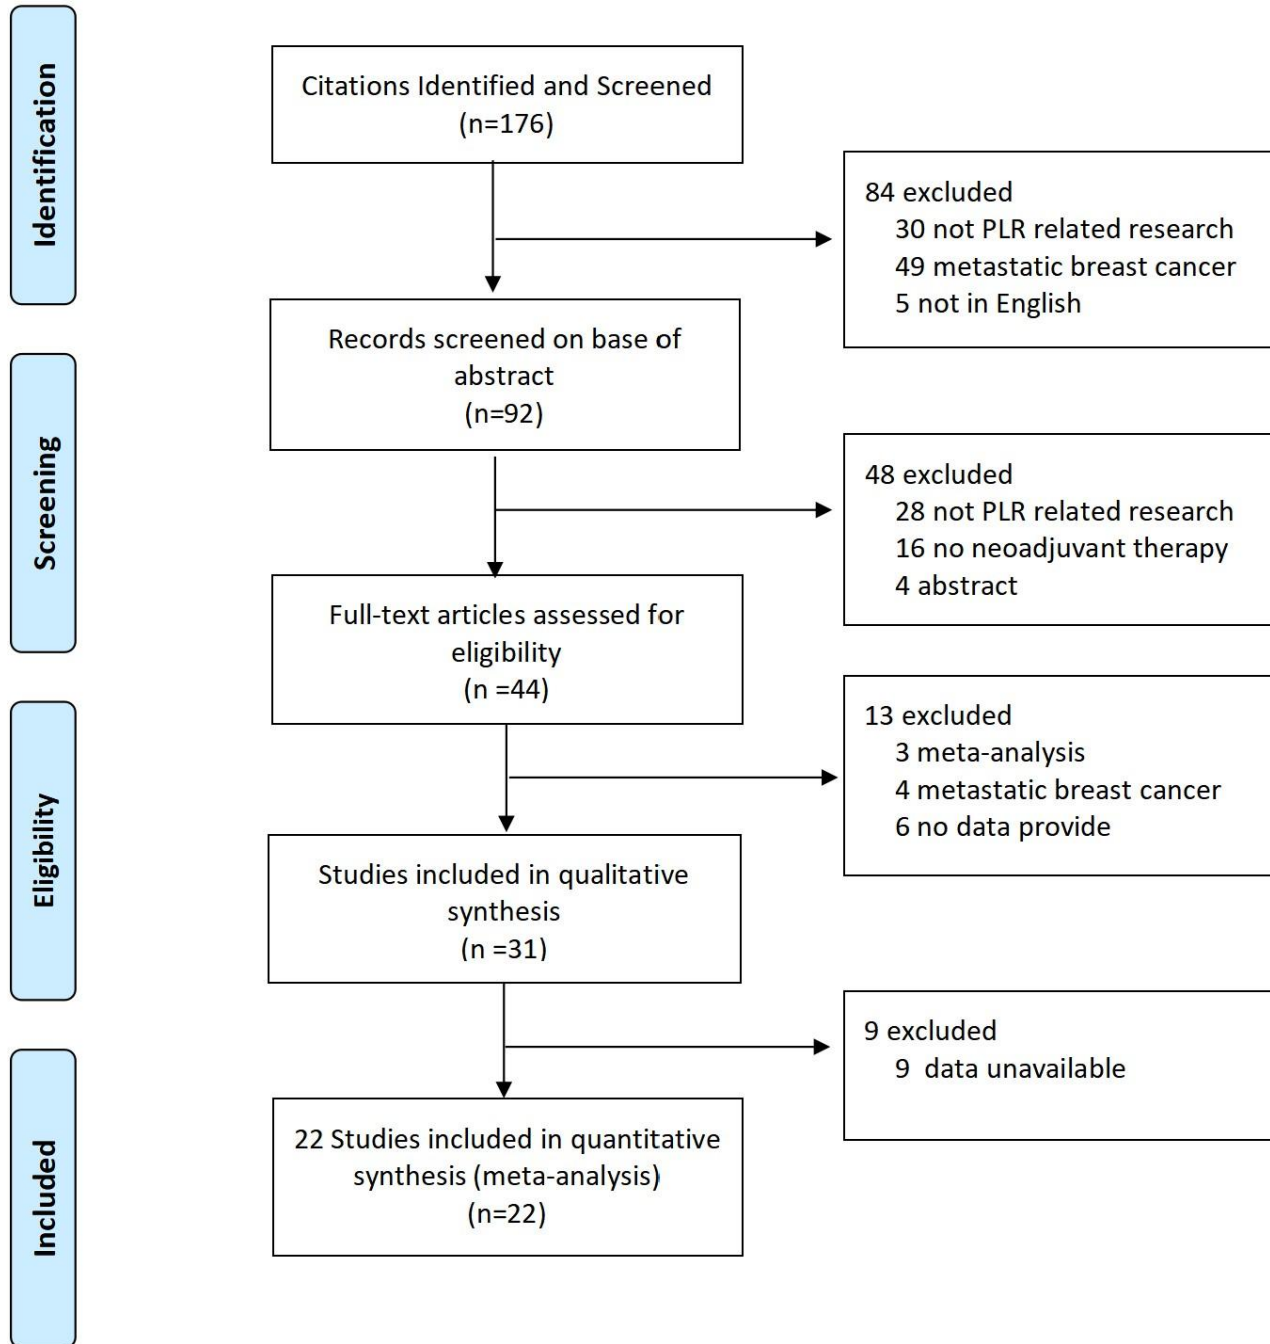

1  
2  
3  
4  
5  
6  
7  
8  
9  
10  
11  
12  
13  
14  
15  
16  
17  
18  
19  
20  
21  
22  
23  
24  
25  
26  
27  
28  
29  
30  
31  
32  
33  
34  
35  
36  
37  
38  
39  
40  
41  
42  
43  
44  
45  
46

1  
2  
3  
4  
5  
6  
7  
8  
9  
10  
11  
12  
13  
14  
15  
16  
17  
18  
19  
20  
21  
22  
23  
24  
25  
26  
27  
28  
29  
30  
31  
32  
33  
34  
35  
36  
37  
38  
39  
40  
41  
42  
43  
44  
45  
46

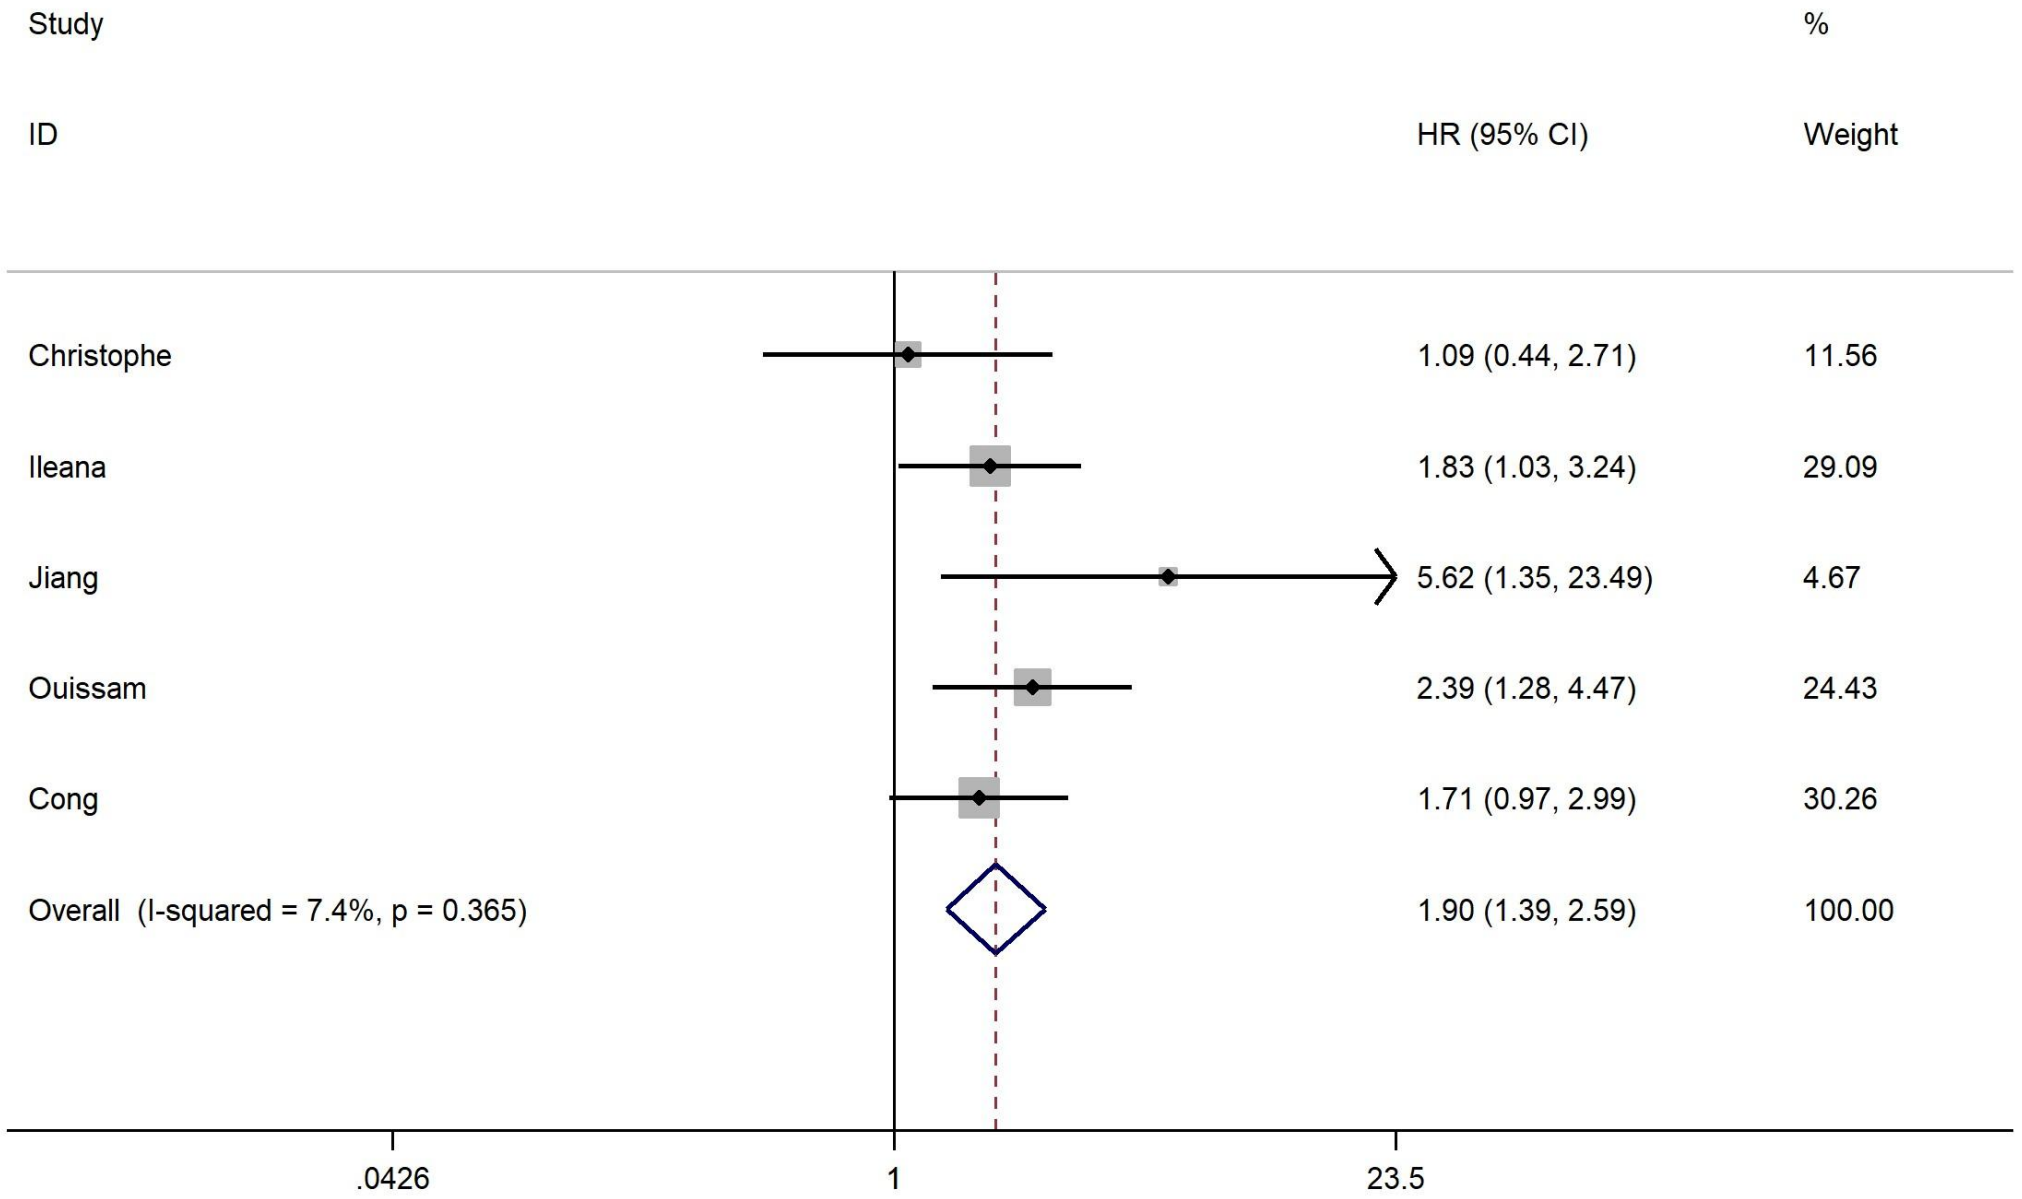

1  
2  
3  
4  
5  
6  
7  
8  
9  
10  
11  
12  
13  
14  
15  
16  
17  
18  
19  
20  
21  
22  
23  
24  
25  
26  
27  
28  
29  
30  
31  
32  
33  
34  
35  
36  
37  
38  
39  
40  
41  
42  
43  
44  
45  
46

| Study | HR (95% CI) | Weight |
|-------|-------------|--------|
|-------|-------------|--------|

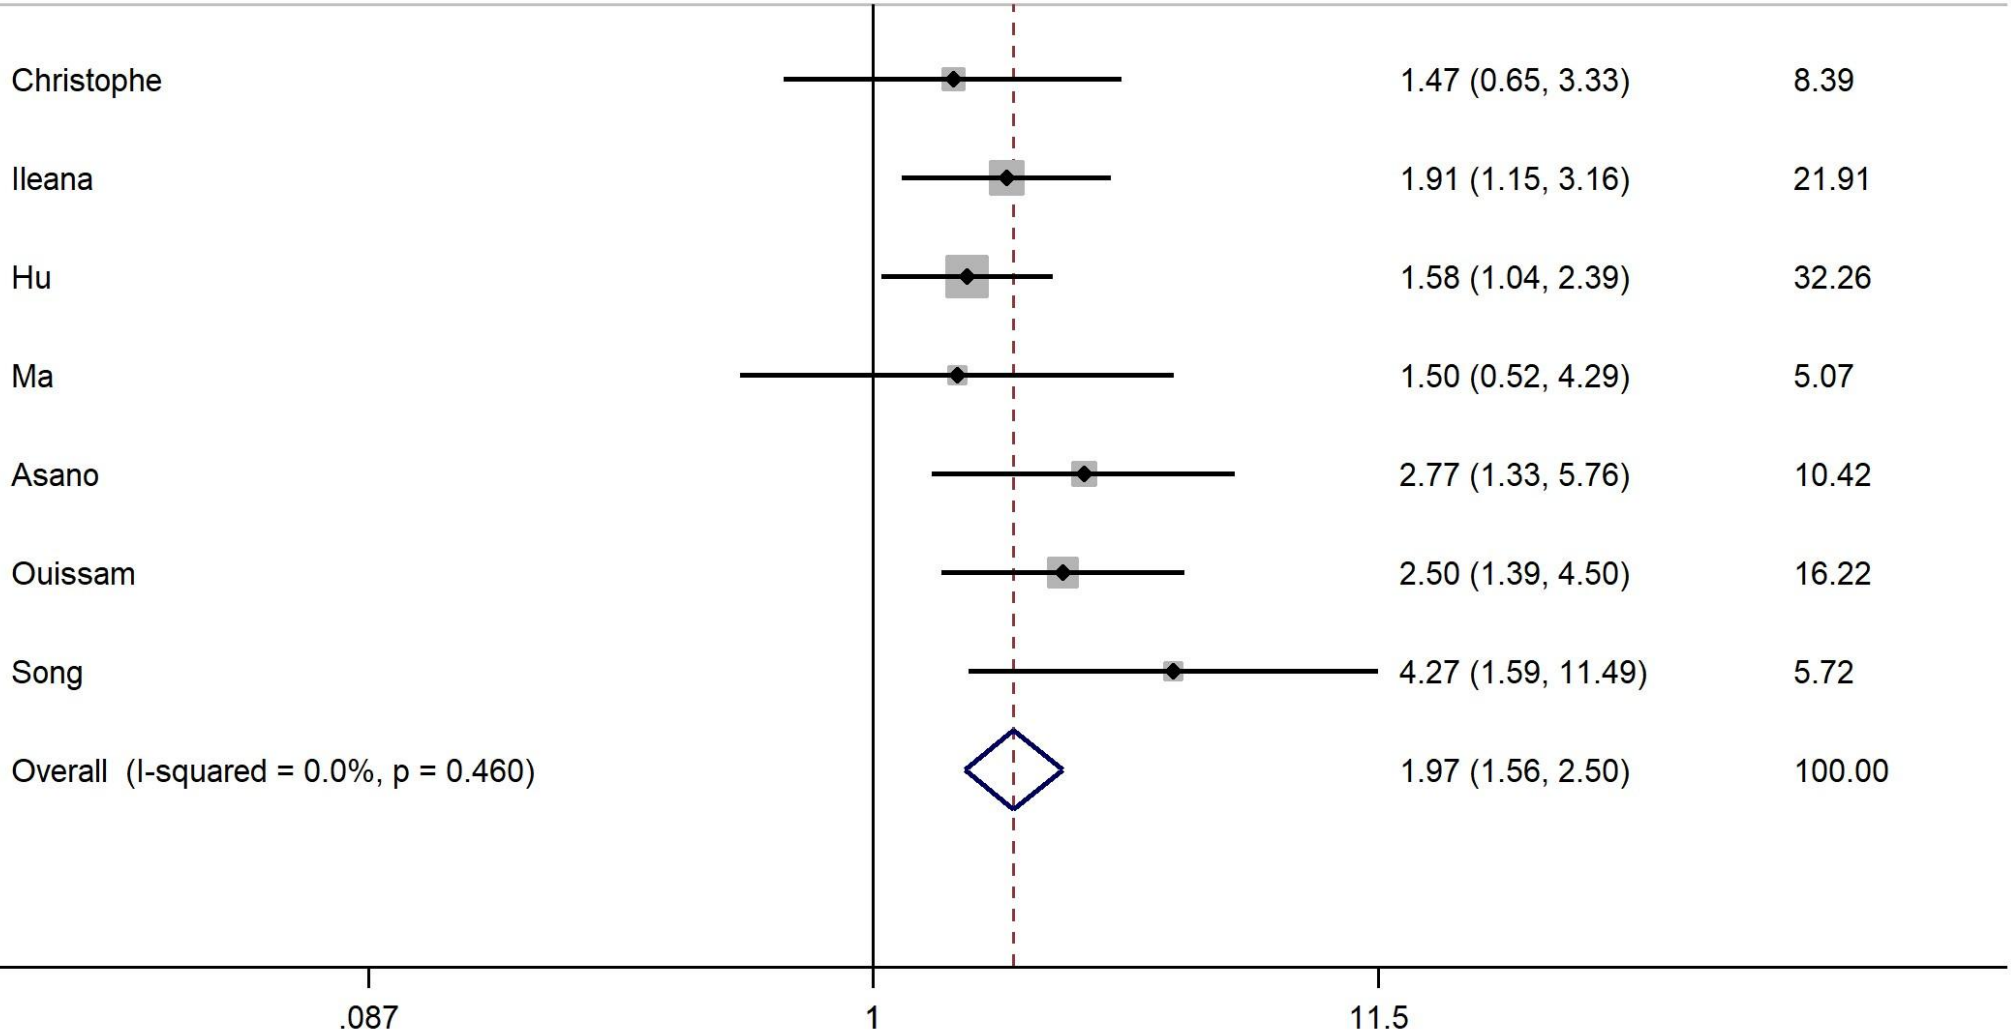

**Table S1. Characteristics of included studies in meta-analysis.**

| NO. | Author     | Year | Country | Ethnicity | Study design  | Study period | Subtype   | Patients (n) | Median age (years) | Follow-up (month)  | Cut-off value | Method         | Outcomes   | NOS score |
|-----|------------|------|---------|-----------|---------------|--------------|-----------|--------------|--------------------|--------------------|---------------|----------------|------------|-----------|
| 1   | Asano      | 2016 | Japan   | Asian     | retrospective | 2007-2013    | All       | 177          | NA                 | 3.4 (0.6-6.0)      | 150           | Previous study | pCR/DFS    | 8         |
| 2   | Vincenzo   | 2018 | Italy   | Caucasian | retrospective | 1999-2018    | All       | 373          | 50 (26-82)         | NA                 | 104.47        | ROC            | pCR        | 6         |
| 3   | Losada     | 2018 | Spain   | Caucasian | retrospective | 2004-2018    | All       | 104          | 71 (65-89)         | 48 (6-149)         | 150           | Previous study | pCR/DFS    | 8         |
| 4   | Javier     | 2018 | America | Caucasian | retrospective | 2013-2016    | All       | 272          | 51 (27-85)         | NA                 | 150           | Previous study | pCR        | 6         |
| 5   | Peng       | 2019 | China   | Asian     | retrospective | 2013-2017    | All       | 808          | 50 (20-72)         | NA                 | 151.3         | ROC            | pCR+PR     | 6         |
| 6   | Ileana     | 2020 | France  | Caucasian | retrospective | 2005-2013    | All       | 206          | 50.3 (25.3-76.6)   | 80.4 (2.4-135.6)   | 150           | Previous study | pCR/OS/DFS | 8         |
| 7   | Tulay      | 2020 | Turkey  | Caucasian | retrospective | 2009-2018    | All       | 131          | 49 (23-74)         | NA                 | 119           | ROC            | pCR        | 6         |
| 8   | Hu         | 2020 | China   | Asian     | retrospective | 2012-2016    | Luminal B | 980          | NA                 | 37 (5-77)          | NA            | NA             | pCR/DFS    | 8         |
| 9   | Alan       | 2020 | Turkey  | Caucasian | retrospective | 2015-2017    | All       | 55           | 48.5 (27-80)       | 41 (15-49)         | 225.3         | ROC            | pCR        | 7         |
| 10  | Jiang      | 2020 | China   | Asian     | retrospective | 2014-2018    | All       | 249          | 51                 | 4-72               | 88.23         | ROC            | pCR/OS     | 8         |
| 11  | Christophe | 2021 | France  | Caucasian | retrospective | 1996-2016    | IBC       | 75           | NA                 | 124.8 (68.5-166.8) | 150           | Previous study | pCR/OS/DFS | 8         |
| 12  | Ahmet      | 2021 | Turkey  | Caucasian | retrospective | 2008-2019    | All       | 743          | 48 (22.0-83.5)     | 67.5 (10.5-194.4)  | 131.8         | ROC            | pCR        | 7         |
| 13  | Kübra      | 2021 | Turkey  | Caucasian | retrospective | 2016-2020    | All       | 150          | 45.6               | NA                 | 150           | Previous study | pCR        | 6         |
| 14  | Ma         | 2021 | China   | Asian     | retrospective | 2017-2018    | All       | 203          | NA                 | 31 (1-39)          | 135           | ROC            | pCR/DFS    | 8         |
| 15  | Ouissam    | 2021 | Morocco | Caucasian | retrospective | 2010-2014    | IBC       | 102          | 49 (29-88)         | NA                 | 178           | ROC            | pCR/OS/DFS | 7         |
| 16  | Cong       | 2022 | China   | Asian     | retrospective | 2012-2016    | All       | 280          | 49                 | NA                 | 155           | ROC            | pCR/OS     | 7         |
| 17  | Chung      | 2022 | China   | Asian     | retrospective | 2012-2019    | TNBC      | 88           | 51                 | NA                 | 148.14        | ROC            | pCR        | 6         |
| 18  | Jin        | 2022 | China   | Asian     | retrospective | 2014-2019    | All       | 67           | 51 (27-81)         | NA                 | 106.3         | ROC            | pCR        | 6         |
| 19  | Song       | 2022 | China   | Asian     | retrospective | 2016-2018    | All       | 144          | 50.4               | 32 (1-40)          | 158.365       | ROC            | DFS        | 8         |
| 20  | Lou        | 2022 | China   | Asian     | retrospective | 2015-2018    | TNBC      | 92           | 52.3 (29-67)       | NA                 | 141.36        | ROC            | pCR        | 6         |
| 21  | Yang       | 2022 | China   | Asian     | retrospective | 2020-2022    | All       | 95           | NA                 | NA                 | 118.78        | ROC            | pCR        | 6         |
| 22  | Acikgoz    | 2022 | Turkey  | Caucasian | retrospective | 2014-2019    | All       | 139          | 45 (25-75)         | 39.5 (7.5-93)      | 181.7         | ROC            | pCR        | 7         |

**Abbreviations:** NA: not available; OS: overall survival; DFS: disease-free survival; pCR: pathologic complete response; ROC: receiver operating characteristic curve; NOS: Newcastle-Ottawa Scale.

**Table S2. Meta-analysis of the association between PLR and clinicopathological parameters of BC with NACT.**

| Variable                                        | No. of studies | No. of patients | Effects model | OR (95% CI)     | P      | Heterogeneity I <sup>2</sup> | P <sub>H</sub> |
|-------------------------------------------------|----------------|-----------------|---------------|-----------------|--------|------------------------------|----------------|
| Age (Yong vs. Old)                              | 9              | 3273            | Fixed         | 0.86(0.79-0.93) | <0.001 | 40.60%                       | 0.096          |
| Histologic type (Ductal vs. Others)             | 4              | 1520            | Fixed         | 0.97(0.94-1.01) | 0.147  | 7.20%                        | 0.357          |
| Grade (G1+G2 vs. G3+unknown)                    | 4              | 1692            | Fixed         | 0.96(0.91-1.02) | 0.203  | 0.00%                        | 0.439          |
| T stage (T1–T2 vs. T3–T4)                       | 6              | 2178            | Random        | 1.05(1.00-1.11) | 0.035  | 70.30%                       | 0.005          |
| Lymph node metastasis (No vs. Yes)              | 5              | 2341            | Fixed         | 0.97(0.88-1.06) | 0.440  | 0.00%                        | 0.952          |
| ki-67 (<14 vs. ≥14)                             | 7              | 2783            | Fixed         | 0.99(0.90-1.09) | 0.771  | 0.00%                        | 0.458          |
| Hormone Receptor (– vs. +)                      | 6              | 2049            | Fixed         | 0.94(0.84-1.06) | 0.309  | 0.00%                        | 0.526          |
| HER-2 (– vs. +)                                 | 7              | 2023            | Random        | 0.91(0.76-1.09) | 0.293  | 69.20%                       | 0.003          |
| Molecular subtype (Luminal vs. TriNeg + HER-2+) | 8              | 2143            | Fixed         | 0.99(0.92-1.07) | 0.845  | 15.20%                       | 0.310          |
| Menopausal status (Pre vs. Post)                | 5              | 1604            | Fixed         | 0.83(0.76-0.90) | <0.001 | 50.80%                       | 0.087          |

**Abbreviations:** OR: odds ratio; 95% CI: 95% confidence interval;  $P_h$ :  $p$  values of Q test for heterogeneity test.



## MOOSE Checklist for Meta-analyses of Observational Studies

| Item No                                     | Recommendation                                                                                                                                                                                                                                                               | Reported on Page No |
|---------------------------------------------|------------------------------------------------------------------------------------------------------------------------------------------------------------------------------------------------------------------------------------------------------------------------------|---------------------|
| Reporting of background should include      |                                                                                                                                                                                                                                                                              |                     |
| 1                                           | Problem definition                                                                                                                                                                                                                                                           | 4                   |
| 2                                           | Hypothesis statement                                                                                                                                                                                                                                                         | 5                   |
| 3                                           | Description of study outcome(s)                                                                                                                                                                                                                                              | 5                   |
| 4                                           | Type of exposure or intervention used                                                                                                                                                                                                                                        | 5                   |
| 5                                           | Type of study designs used                                                                                                                                                                                                                                                   | 5                   |
| 6                                           | Study population                                                                                                                                                                                                                                                             | 5                   |
| Reporting of search strategy should include |                                                                                                                                                                                                                                                                              |                     |
| 7                                           | Qualifications of searchers (eg, librarians and investigators)                                                                                                                                                                                                               | 6                   |
| 8                                           | Search strategy, including time period included in the synthesis and key words                                                                                                                                                                                               | 5                   |
| 9                                           | Effort to include all available studies, including contact with authors                                                                                                                                                                                                      | 6                   |
| 10                                          | Databases and registries searched                                                                                                                                                                                                                                            | 5                   |
| 11                                          | Search software used, name and version, including special features used (eg, explosion)                                                                                                                                                                                      | 5                   |
| 12                                          | Use of hand searching (eg, reference lists of obtained articles)                                                                                                                                                                                                             | 5                   |
| 13                                          | List of citations located and those excluded, including justification                                                                                                                                                                                                        | 5                   |
| 14                                          | Method of addressing articles published in languages other than English                                                                                                                                                                                                      | 5                   |
| 15                                          | Method of handling abstracts and unpublished studies                                                                                                                                                                                                                         | 5                   |
| 16                                          | Description of any contact with authors                                                                                                                                                                                                                                      | 5                   |
| Reporting of methods should include         |                                                                                                                                                                                                                                                                              |                     |
| 17                                          | Description of relevance or appropriateness of studies assembled for assessing the hypothesis to be tested                                                                                                                                                                   | 6                   |
| 18                                          | Rationale for the selection and coding of data (eg, sound clinical principles or convenience)                                                                                                                                                                                | 6                   |
| 19                                          | Documentation of how data were classified and coded (eg, multiple raters, blinding and interrater reliability)                                                                                                                                                               | 6                   |
| 20                                          | Assessment of confounding (eg, comparability of cases and controls in studies where appropriate)                                                                                                                                                                             | 6                   |
| 21                                          | Assessment of study quality, including blinding of quality assessors, stratification or regression on possible predictors of study results                                                                                                                                   | 6                   |
| 22                                          | Assessment of heterogeneity                                                                                                                                                                                                                                                  | 6-7                 |
| 23                                          | Description of statistical methods (eg, complete description of fixed or random effects models, justification of whether the chosen models account for predictors of study results, dose-response models, or cumulative meta-analysis) in sufficient detail to be replicated | 6-7                 |
| 24                                          | Provision of appropriate tables and graphics                                                                                                                                                                                                                                 | 26                  |
| Reporting of results should include         |                                                                                                                                                                                                                                                                              |                     |
| 25                                          | Graphic summarizing individual study estimates and overall estimate                                                                                                                                                                                                          | 26                  |
| 26                                          | Table giving descriptive information for each study included                                                                                                                                                                                                                 | 26                  |
| 27                                          | Results of sensitivity testing (eg, subgroup analysis)                                                                                                                                                                                                                       | 10                  |
| 28                                          | Indication of statistical uncertainty of findings                                                                                                                                                                                                                            | 10                  |

| Item No                                 | Recommendation                                                                                                            | Reported on Page No |
|-----------------------------------------|---------------------------------------------------------------------------------------------------------------------------|---------------------|
| Reporting of discussion should include  |                                                                                                                           |                     |
| 29                                      | Quantitative assessment of bias (eg, publication bias)                                                                    | 10                  |
| 30                                      | Justification for exclusion (eg, exclusion of non-English language citations)                                             | 26                  |
| 31                                      | Assessment of quality of included studies                                                                                 | 26                  |
| Reporting of conclusions should include |                                                                                                                           |                     |
| 32                                      | Consideration of alternative explanations for observed results                                                            | 10-14               |
| 33                                      | Generalization of the conclusions (ie, appropriate for the data presented and within the domain of the literature review) | 15                  |
| 34                                      | Guidelines for future research                                                                                            | 15                  |
| 35                                      | Disclosure of funding source                                                                                              | 16                  |

From: Stroup DF, Berlin JA, Morton SC, et al, for the Meta-analysis Of Observational Studies in Epidemiology (MOOSE) Group. Meta-analysis of Observational Studies in Epidemiology. A Proposal for Reporting. *JAMA*. 2000;283(15):2008-2012. doi: 10.1001/jama.283.15.2008.

Transcribed from the original paper within the NEUROSURGERY® Editorial Office, Atlanta, GA, United States. August 2012.

# BMJ Open

## Prognostic Significance of Platelet-Lymphocyte Ratio (PLR) in Breast Cancer Patients Treated with Neoadjuvant Chemotherapy: A Meta-analysis

|                                 |                                                                                                                                                                                                                                                                                                                                                                                                                                                                                                                                                                                                                                                                                                                                                                                                                              |
|---------------------------------|------------------------------------------------------------------------------------------------------------------------------------------------------------------------------------------------------------------------------------------------------------------------------------------------------------------------------------------------------------------------------------------------------------------------------------------------------------------------------------------------------------------------------------------------------------------------------------------------------------------------------------------------------------------------------------------------------------------------------------------------------------------------------------------------------------------------------|
| Journal:                        | <i>BMJ Open</i>                                                                                                                                                                                                                                                                                                                                                                                                                                                                                                                                                                                                                                                                                                                                                                                                              |
| Manuscript ID                   | bmjopen-2023-074874.R2                                                                                                                                                                                                                                                                                                                                                                                                                                                                                                                                                                                                                                                                                                                                                                                                       |
| Article Type:                   | Original research                                                                                                                                                                                                                                                                                                                                                                                                                                                                                                                                                                                                                                                                                                                                                                                                            |
| Date Submitted by the Author:   | 06-Nov-2023                                                                                                                                                                                                                                                                                                                                                                                                                                                                                                                                                                                                                                                                                                                                                                                                                  |
| Complete List of Authors:       | <p>Qi, Xue; Nantong Liangchun Hospital of Traditional Chinese Medicine, Department of Oncology<br/>           Chen, Jia; Affiliated Tumor Hospital of Nantong University, Department of Oncology<br/>           Wei, Sheng; Affiliated Tumor Hospital of Nantong University, Department of Radiotherapy<br/>           Ni, Jingyi; Affiliated Tumor Hospital of Nantong University, Department of Oncology<br/>           Song, Li; Affiliated Tumor Hospital of Nantong University, Department of Oncology<br/>           Jin, Conghui; Affiliated Tumor Hospital of Nantong University, Department of Oncology<br/>           Yang, Lei; Affiliated Tumor Hospital of Nantong University, Department of Oncology<br/>           Zhang, Xunlei; Affiliated Tumor Hospital of Nantong University, Department of Oncology</p> |
| <b>Primary Subject Heading</b>: | Oncology                                                                                                                                                                                                                                                                                                                                                                                                                                                                                                                                                                                                                                                                                                                                                                                                                     |
| Secondary Subject Heading:      | Evidence based practice, Pathology, Pharmacology and therapeutics, Surgery                                                                                                                                                                                                                                                                                                                                                                                                                                                                                                                                                                                                                                                                                                                                                   |
| Keywords:                       | ONCOLOGY, Breast tumours < ONCOLOGY, Prognosis                                                                                                                                                                                                                                                                                                                                                                                                                                                                                                                                                                                                                                                                                                                                                                               |
|                                 |                                                                                                                                                                                                                                                                                                                                                                                                                                                                                                                                                                                                                                                                                                                                                                                                                              |

SCHOLARONE™  
Manuscripts

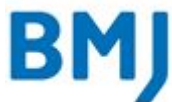

I, the Submitting Author has the right to grant and does grant on behalf of all authors of the Work (as defined in the below author licence), an exclusive licence and/or a non-exclusive licence for contributions from authors who are: i) UK Crown employees; ii) where BMJ has agreed a CC-BY licence shall apply, and/or iii) in accordance with the terms applicable for US Federal Government officers or employees acting as part of their official duties; on a worldwide, perpetual, irrevocable, royalty-free basis to BMJ Publishing Group Ltd ("BMJ") its licensees and where the relevant Journal is co-owned by BMJ to the co-owners of the Journal, to publish the Work in this journal and any other BMJ products and to exploit all rights, as set out in our [licence](#).

The Submitting Author accepts and understands that any supply made under these terms is made by BMJ to the Submitting Author unless you are acting as an employee on behalf of your employer or a postgraduate student of an affiliated institution which is paying any applicable article publishing charge ("APC") for Open Access articles. Where the Submitting Author wishes to make the Work available on an Open Access basis (and intends to pay the relevant APC), the terms of reuse of such Open Access shall be governed by a Creative Commons licence – details of these licences and which [Creative Commons](#) licence will apply to this Work are set out in our licence referred to above.

Other than as permitted in any relevant BMJ Author's Self Archiving Policies, I confirm this Work has not been accepted for publication elsewhere, is not being considered for publication elsewhere and does not duplicate material already published. I confirm all authors consent to publication of this Work and authorise the granting of this licence.

1  
2  
3  
4 **Prognostic Significance of Platelet-Lymphocyte Ratio (PLR)**  
5  
6 **in Breast Cancer Patients Treated with Neoadjuvant**  
7  
8 **Chemotherapy: A Meta-analysis**  
9  
10

11 **Xue Qi<sup>1,\*</sup>, Jia Chen<sup>2,\*</sup>, Sheng Wei<sup>3,\*</sup>, Jingyi Ni<sup>2</sup>, Li Song<sup>2</sup>, Conghui**  
12 **Jin<sup>2</sup>, Lei Yang<sup>2,#</sup>, Xunlei Zhang<sup>2,#</sup>**  
13  
14

15  
16  
17 1. Department of Oncology, Nantong Liangchun Hospital of Traditional Chinese  
18 Medicine, Nantong Jiangsu 226300, China;

19  
20  
21 2. Department of Oncology, Tumor Hospital Affiliated to Nantong University,  
22 Nantong Jiangsu 226300, China;

23  
24  
25 3. Department of Radiotherapy, Tumor Hospital Affiliated to Nantong University,  
26 Nantong Jiangsu 226300, China;

27  
28  
29 **\* These authors contributed equally to this work**  
30  
31

32  
33 **# Correspondence Authors:**  
34

35  
36 1. Xunlei Zhang, Department of Oncology, Tumor Hospital Affiliated to Nantong  
37 University, Nantong Jiangsu 226300, China; Tel/fax +86 513 8672 9169; E-mail:  
38 477750911@qq.com  
39

40  
41 2. Lei Yang, Department of Oncology, Tumor Hospital Affiliated to Nantong  
42 University, Nantong Jiangsu 226300, China; Tel/fax +86 513 8672 8238; E-mail:  
43 leiyang.53@163.com  
44  
45  
46  
47  
48  
49  
50  
51  
52  
53  
54  
55  
56  
57  
58  
59  
60

## Abstract

**Objective:** PLR (platelet-lymphocyte ratio), known as a key systemic inflammatory parameter, have been proved to be associated with response to neoadjuvant therapy in breast cancer (BC); however, the results remain controversial. This meta-analysis was carried out to evaluate the prognostic values of PLR in breast cancer patients treated with neoadjuvant chemotherapy.

**Design:** Meta-analysis.

**Data sources:** Relevant literature published on the following databases: PubMed, Embase, Web of Science databases and the Cochrane Library.

**Eligibility criteria:** All studies involving patients with breast cancer treated with NACT and peripheral blood pretreatment PLR recorded were included.

**Data extraction and synthesis:** Two researchers independently extracted and evaluated hazard ratio (HR) /Odds Ratio (OR) and its 95% confidence (CI) of survival outcomes, pathologic complete response (pCR) rate and clinicopathological parameters.

**Results:** The last search was updated to Dec 31, 2022. A total of 22 studies with 5533 breast cancer patients treated with neoadjuvant chemotherapy were enrolled in the final meta-analysis. Our results demonstrate that elevated PLR value appears to correlate with low pCR rate (HR: 0.77, 95% CI: 0.67-0.88,  $p < 0.001$ ,  $I^2=75.80\%$ ,  $P_h < 0.001$ ) and poor prognosis, including OS (HR: 1.90, 95% CI: 1.39-2.59,  $p < 0.001$ ;  $I^2= 7.40\%$ ,  $P_h = 0.365$ ) and DFS (HR: 1.97, 95% CI: 1.56-2.50,  $p < 0.001$ ;  $I^2= 0.0\%$ ,  $P_h = 0.460$ ). Furthermore, PLR level was associated with age (OR: 0.86, 95% CI: 0.79-0.93,  $p < 0.001$ ,  $I^2= 40.60\%$ ,  $P_h = 0.096$ ), menopausal status (OR: 0.83, 95% CI: 0.76-0.90,  $p < 0.001$ ,  $I^2= 50.80\%$ ,  $P_h = 0.087$ ) and T stage (OR: 1.05, 95% CI: 1.00-1.11,  $p = 0.035$ ;  $I^2= 70.30\%$ ,  $P_h = 0.005$ ) of breast cancer patients.

**Conclusions:** This meta-analysis demonstrated that high PLR was significantly related to the low pCR rate, poor OS and PFS of breast cancer patients treated with neoadjuvant chemotherapy. Therefore, PLR can be used as a potential predictor biomarker for the efficacy of neoadjuvant chemotherapy in breast cancer.

## Strengths and limitations of this study

1. This is the first meta-analysis to assess the role of platelet-lymphocyte ratio (PLR) in predicting pCR rate and survival in BC patients treated with NACT.
2. Scientific and reliable statistical methods were applied.
3. The association between PLR and clinicopathological parameters of BC with NACT were explored in the stratified analysis.
4. All the studies included in this meta-analysis were retrospective and lacked detailed clinicopathological information, which may lead to bias of our results.

## Keywords

Platelet, Lymphocyte, PLR, Breast Cancer, Neoadjuvant Chemotherapy, Meta-Analysis

**Word count: 8455**



## Introduction

Breast cancer (BC) is the most frequently diagnosed malignant neoplasm in women worldwide.[1] BC patients in China account for 12.2% of the total number of newly diagnosed and 9.6% of all breast cancer related deaths in the world.[2] About 20-25% of patients are diagnosed with locally advanced breast cancer, which prone to recurrence and metastasis after surgery without any Preoperative treatment.[3, 4] Survival rates for BC patients have increased dramatically due to the development of treatment strategies, such as individualized treatment plans made by multidisciplinary teams, including surgical, radiation and medical oncology.[5] At present, neoadjuvant chemotherapy (NACT) has become the standard and effective treatment for patients with locally advanced breast cancer.[6] The aim of NACT is mainly to reduce tumor size and the stage of tumors, improve tumor operability, and improve the success rates of breast conservative operation.[7-9] Additionally, the effects of NACT could provide information to assess the efficacy of chemotherapy during the treatment.[10] However, not all patients receiving neoadjuvant therapy can achieve therapeutic benefit, especially pathologic complete response (pCR). Previous studies showed that the pCR rate of NACT is about 30% in human epidermal growth factor receptor 2 (HER2) (+) patients, 30-50% in triple negative breast cancer and less than 10% in estrogen receptor (ER) (+) and HER2 (-) breast cancer patients.[11-13] The situation may be related to different pathological types, ER status, HER-2 status, disease stage, and other factors. Some gene mutations, such as PIK3CA, TP53, SIRT5 and CDKN2A, have been proved to be associated with poor response to NACT in breast cancer patients.[14] However, these above biomarkers are expensive and difficult to obtain. Hence, it's necessary to find a convenient, inexpensive and reliable marker, which can predict response after NACT.

It is well recognized that the systemic inflammatory response plays an essential role in breast cancer progression and development.[15, 16] Numerous studies have shown that inflammatory biomarkers such as neutrophil-to-lymphocyte ratio (NLR), platelet-to-lymphocyte ratio (PLR) and systemic immune-inflammation index (SII),



1  
2  
3  
4 are associated with chemosensitivity and prognosis for different malignancies.[17-21]  
5  
6 PLR, as one of the most commonly used markers, was proved to be an convenient and  
7  
8 cost-effective blood-derived prognostic marker to evaluate the prognosis of breast  
9  
10 cancer. Elevated PLR has been linked with poor prognosis for breast cancer in  
11  
12 previous studies.[22-24] Furthermore, some research found that a higher PLR may  
13  
14 lead to a worse response to NACT for breast cancer patients.[25, 26] However, some  
15  
16 other studies showed that the BC patients with higher PLR may achieve more pCR  
17  
18 rate after NACT.[27, 28] Thus, the role of PLR as a predictor for outcomes in BC  
19  
20 patients after NACT is still not clear. This meta-analysis is aimed to explore the  
21  
22 predictive value of PLR in patients with breast cancer treated with NACT.

## 23 **Materials and Methods**

### 24 **Patient and Public Involvement**

25  
26  
27  
28 None  
29

### 30 **Literature search**

31  
32 A systematic literature search was conducted based on the following databases:  
33  
34 PubMed, Embase, Web of Science databases and the Cochrane Library. The  
35  
36 keywords for the search strategy are as follows: (“PLR” or “platelet lymphocyte  
37  
38 ratio” or “platelet-to-lymphocyte ratio” or “platelet-lymphocyte ratio”) and (“breast  
39  
40 cancer”, “breast tumor”, “breast carcinoma”, “breast neoplasms”, “mammary cancer”)  
41  
42 and (“neoadjuvant chemotherapy”, “preoperative chemotherapy”, “preoperative  
43  
44 systemic treatment”, “pre-surgical treatment”, “primary chemotherapy”). The last  
45  
46 search was updated to Dec 31, 2022, and all the articles were limited to  
47  
48 English-language. We also used a hand search for the reference list of the retrieved  
49  
50 articles in order to identify additional studies. The selection process of the  
51  
52 meta-analysis is shown in Figure S1. This study was conducted according to the  
53  
54 Preferred Reporting Items for Systematic Reviews and Meta-Analyses (PRISMA)  
55  
56 statement. No patient consent and ethical approval were required in this study.  
57  
58

### 59 **Inclusion and exclusion criteria**

60

1  
2  
3  
4 The included studies in this analysis had to meet the following criteria: (1)  
5 patients with breast cancer received neoadjuvant treatment and surgery; (2) studies  
6 with the peripheral blood pretreatment PLR values; (3) studies with pathologic  
7 response status or survival outcomes after neoadjuvant treatment, including pCR,  
8 disease-free survival (DFS), overall survival (OS), OR and HR with 95% confidence  
9 intervals (CI). The exclusion criteria were as follows: (1) Abstracts, reviews, case  
10 studies, letters, non-human subject studies and non-English language studies; (2)  
11 breast cancer participants did not receive neoadjuvant treatment; (3) Research with  
12 insufficient data.  
13  
14  
15  
16  
17  
18  
19  
20

### 21 **Data extraction and quality assessment**

22  
23 Two researchers independently reviewed the available literature and extracted  
24 data as follows: (1) study details: first author, country, publication year, study design,  
25 study period, sample size, median age, outcomes, follow-up time; (2)  
26 clinicopathologic parameters: subtype of BC, cut-off value, cut-off method, numbers  
27 in high and low PLR groups stratified by age, histologic type, tumor grade, T stage,  
28 lymph node metastasis, ki-67 value, hormone receptor status, HER-2 status,  
29 molecular subtype, menopausal status; (3) treatment outcomes: numbers in pCR and  
30 non-pCR groups, HR with 95% CIs of DFS and OS.  
31  
32  
33  
34  
35  
36  
37  
38

39 We used the Newcastle Ottawa Scale (NOS) rating scale to assess the quality of  
40 the included studies. The studies was scored from 0 to 9 points, based on the object  
41 selection, comparability, outcome, and exposure. High-quality literature should have a  
42 score of  $\geq 6$ . If the two researchers had disagreement, a third researcher was invited to  
43 achieve a consistent result.  
44  
45  
46  
47  
48

### 49 **Statistical analysis**

50  
51 All analyses were performed using Stata software version 12.0 (Stata  
52 Corporation, College Station, TX, USA), using two-sided P values. Odds ratio (OR)  
53 with corresponding 95% CI was used to evaluate the association between PLR and  
54 pCR rate, clinicopathological characteristics. Hazard ratios (HR) with corresponding  
55 95% CI was used as an effect measure to assess the relationship between PLR and  
56  
57  
58  
59  
60

1  
2  
3  
4 DFS, OS. Then the log OR, log HR, and corresponding standard error (SE) were used  
5  
6 to compute pooled effect measures. Moreover, stratified analyses were also performed  
7  
8 based on ethnicity, cut-off value, cut-off method and sub-type of breast cancer. Both  
9  
10 the Cochran's Q statistic and the  $I^2$  statistic were calculated to estimate heterogeneity  
11  
12 among the included studies.[29, 30] If the P value of the Q test was  $<0.05$  or  $I^2 >50\%$ ,  
13  
14 indicating significant heterogeneity across studies, the pooled OR and HR were  
15  
16 calculated by the random effects model (the DerSimonian and Laird method).[31]  
17  
18 Otherwise, fixed effects model (the Mantel–Haenszel method) was used.[31]  
19  
20 Publication bias was evaluated using Funnel plots and Egger's linear regression test.  
21  
22 Sensitivity analyses were performed by omitting each single study to show the  
23  
24 influence of the individual data set to the pooled results.  $P < 0.05$  was considered  
25  
26 statistically significant.

## 27 28 **Results**

### 29 30 **Study characteristics**

31  
32 As shown in the flow diagram (Figure S1), 176 research articles were identified  
33  
34 in the preliminary search. After reviewing the titles, abstracts and full texts, 154  
35  
36 studies were excluded according to the search criteria and 22 studies were finally  
37  
38 included in the meta-analysis.[22, 25, 26, 28, 32-41] The main characteristics of the  
39  
40 included studies are summarized in Table S1. The 22 enrolled studies containing 5533  
41  
42 BC patients were published between 2016 and 2022 with the sample size ranging  
43  
44 from 55 to 980. 11 studies were carried out in Asian countries (China and Japan) and  
45  
46 the other 11 studies were conducted in Caucasian countries (Turkey, America, Spain,  
47  
48 Italy, France and Morocco). All studies were retrospective, with study period ranging  
49  
50 from 1996 – 2022. The follow-up time ranged from 3.4 to 124.8 months in these  
51  
52 studies, with NOS scores of 6 – 8 points. Most of the study subjects contained all  
53  
54 breast cancer types, and included two studies of inflammatory breast cancer, two  
55  
56 studies of triple negative breast cancer and one study of Luminal B breast cancer. All  
57  
58 patients received standardized neoadjuvant chemotherapy and surgery, with the  
59  
60 median age ranged from 45 to 71 years old. Cut-off values for PLR were provided in

1  
2  
3  
4 21 studies, 6 of which were derived from previous studies and another 15 were  
5 obtained from ROC curves.  
6

### 7 **Association between PLR and pCR of BC**

9  
10 19 studies with 4301 patients reported the correlation between the PLR and  
11 pCR.[22, 26, 28, 32-40, 42-48] Our results indicate that high PLR level was  
12 significantly associated with low pCR rate (HR: 0.77, 95% CI: 0.67-0.88,  $p < 0.001$ ),  
13 and significant heterogeneity was observed ( $I^2=75.80\%$ ,  $P_h < 0.001$ , Table 1, Figure  
14 1). When stratified analyses were performed based on ethnicity, the results showed  
15 that Caucasian studies were still statistically significant (HR: 0.77, 95% CI: 0.68-0.88,  
16  $p < 0.001$ ;  $I^2=61.60\%$ ,  $P_h = 0.004$ ). On the other hand, there was no statistically  
17 significance observed for PLR and pCR among the Asian studies (HR: 0.83, 95% CI:  
18 0.58-1.17,  $p = 0.288$ ;  $I^2= 85.00\%$ ,  $P_h < 0.001$ ). Subgroup analysis were also  
19 performed to determine the effects of cut-off values and methods on the outcomes.  
20 Studies with cut-off value  $\geq 150$  showed a significant association between the PLR  
21 and pCR (HR: 0.78, 95% CI: 0.67-0.91,  $p = 0.001$ ;  $I^2= 68.20\%$ ,  $P_h = 0.001$ ), while  
22 cut-off values  $< 150$  did not achieve statistical significance (HR: 0.80, 95% CI:  
23 0.59-1.10,  $p = 0.172$ ;  $I^2= 82.90\%$ ,  $P_h < 0.001$ ). On the other hand, we observed  
24 statistically significant relationship between PLR and pCR, no matter the cut-off  
25 values obtained from ROC curves (HR: 0.72, 95% CI: 0.57-0.92,  $p = 0.008$ ;  $I^2=$   
26 81.10%,  $P_h < 0.001$ ) or previous studies (HR: 0.86, 95% CI: 0.78-0.94,  $p = 0.001$ ;  $I^2=$   
27 39.30%,  $P_h = 0.144$ ). Further subgroup analysis was also conducted by tumor  
28 subtypes. In the all types group (HR: 0.76, 95% CI: 0.64-0.89,  $p = 0.001$ ;  $I^2= 74.00\%$ ,  
29  $P_h < 0.001$ ) and inflammatory breast cancer group (HR: 0.83, 95% CI: 0.70-0.97,  $p =$   
30 0.021;  $I^2= 0.00\%$ ,  $P_h = 0.368$ ), statistical significance were noted between PLR and  
31 pCR. In comparison, studies in the triple negative breast cancer group did not show a  
32 significant association (HR: 0.91, 95% CI: 0.26-3.21,  $p = 0.885$ ;  $I^2= 94.70\%$ ,  $P_h <$   
33 0.001).  
34  
35  
36  
37  
38  
39  
40  
41  
42  
43  
44  
45  
46  
47  
48  
49  
50  
51  
52  
53  
54  
55  
56

### 57 **Association between PLR and survival of BC**

58  
59 5 studies with 912 patients evaluated the relationship between OS and PLR.[25,  
60

1  
2  
3  
4 35, 40, 43, 49] The pooled results demonstrated that high PLR was significantly  
5 associated with poor OS in patients with breast cancer (HR: 1.90, 95% CI: 1.39-2.59,  
6  $p < 0.001$ ;  $I^2 = 7.40\%$ ,  $P_h = 0.365$ ) (Table 2, Figure S2). Subgroup analyses by  
7 ethnicity showed that PLR had significantly prognostic value for OS both in Asian  
8 and Caucasian populations (HR: 2.00, 95% CI: 1.19-3.38,  $p = 0.009$ ,  $I^2 = 56.70\%$ ,  $P_h =$   
9  $0.128$ ; HR: 1.85, 95% CI: 1.26-2.71,  $p = 0.002$ ,  $I^2 = 0.0\%$ ,  $P_h = 0.378$ ). Moreover,  
10 when stratified by subtypes of breast cancer, the results indicated that the prognostic  
11 effect of PLR on OS was similarly significant among the all types group (HR: 1.92,  
12 95% CI: 1.31-2.83,  $p = 0.001$ ;  $I^2 = 15.30\%$ ,  $P_h = 0.307$ ) and inflammatory breast  
13 cancer group (HR: 1.86, 95% CI: 1.11-3.11,  $p = 0.018$ ;  $I^2 = 48.60\%$ ,  $P_h = 0.163$ ).  
14 Furthermore, when considering different cut-off value methods, high PLR  
15 significantly predicted shorter OS when cut-off values were conducted by ROC (HR:  
16 2.15, 95% CI: 1.44-3.22,  $p < 0.001$ ;  $I^2 = 19.80\%$ ,  $P_h = 0.288$ ), but did not show  
17 significantly prognostic efficiency in the group of cut-off value obtained from  
18 previous studies (HR: 1.58, 95% CI: 0.97-2.56,  $p = 0.065$ ;  $I^2 = 0.0\%$ ,  $P_h = 0.345$ ).

19  
20  
21  
22  
23  
24  
25  
26  
27  
28  
29  
30  
31  
32  
33  
34  
35  
36  
37  
38  
39  
40  
41  
42  
43  
44  
45  
46  
47  
48  
49  
50  
51  
52  
53  
54  
55  
56  
57  
58  
59  
60  
7 studies with 1887 patients analyzed the relationship between the PLR and  
DFS.[25, 26, 35, 37, 38, 43, 50] The pooled results indicated that DFS was  
significantly shorter in high PLR group than in low PLR group (HR: 1.97, 95% CI:  
1.56-2.50,  $p < 0.001$ ;  $I^2 = 0.0\%$ ,  $P_h = 0.460$ ) (Table 2, Figure S3). We also performed  
further subgroup analysis based on ethnicity, subtypes of BC and cut-off value  
methods. Compared with the overall results, no significant changes were identified  
after stratification, and no significant heterogeneity was observed.

### **Association between PLR and clinicopathological parameters of BC**

To analyze the impact of PLR on the clinicopathological characteristics in breast  
cancer patients, we pooled the results from included studies according to age,  
histologic type, tumor grade, T stage, lymph node metastasis, ki-67 value, hormone  
receptor status, HER-2 status, molecular subtype, menopausal status. As shown in  
Table S2, young patients and pre-menopausal status patients had significantly higher  
PLR value than old or post-menopausal status patients (OR: 0.86, 95% CI: 0.79-0.93,

1  
2  
3  
4  $p < 0.001$ ,  $I^2 = 40.60\%$ ,  $P_h = 0.096$ ; OR: 0.83, 95% CI: 0.76-0.90,  $p < 0.001$ ,  $I^2 =$   
5 50.80%,  $P_h = 0.087$ ). In comparison to low PLR groups, the high PLR groups had a  
6 higher T stage (OR: 1.05, 95% CI: 1.00-1.11,  $p = 0.035$ ;  $I^2 = 70.30\%$ ,  $P_h = 0.005$ ).  
7  
8 Whereas the other results indicated no significant association of PLR with histologic  
9 type, tumor grade, lymph node metastasis, ki-67 value, hormone receptor status,  
10 HER-2 status and molecular subtype.  
11  
12  
13  
14

### 15 **Sensitivity analysis**

16  
17 Sensitivity analysis results showed that the pooled ORs are not altered materially  
18 when deleted a single study each time. The sensitivity analysis plot presented that all  
19 the included studies are near the central line with no clear deviation, suggesting that  
20 our results were statistically robust (Figure 2A).  
21  
22  
23  
24

### 25 **Publication bias**

26  
27 Begg's funnel plot and Egger's test were used to evaluate the publication bias of  
28 the literature. The funnel plots did not reveal obvious evidence of asymmetry (Figure  
29 2B). Then, the Egger's test still did not show any significant statistical evidence of  
30 publication bias ( $P = 0.862$ ).  
31  
32  
33  
34  
35

### 36 **Discussion**

37  
38 This meta-analysis assessed the association between pretreatment PLR with pCR  
39 and survival on 5533 breast cancer patients treated with neoadjuvant chemotherapy.  
40 Our results demonstrate that elevated PLR value appears to correlate with low pCR  
41 rate and poor prognosis, including OS and DFS. Consistent with previous studies, our  
42 findings suggest that PLR could be a significant prognostic marker for breast cancer  
43 patients who received NACT.[26, 35, 37, 40, 43]  
44  
45  
46  
47  
48  
49

50 Neoadjuvant chemotherapy is increasingly used to treat locally advanced breast  
51 cancer, so as to reduce the size of tumors and increase the possibility of  
52 breast-conserving surgery.[51] However, there are no ready-made and reliable  
53 biomarkers to predict the response to NACT. In recent years, many studies have  
54 focused on the relationship between inflammation related biomarkers and tumors.  
55 These studies showed that tumor related inflammation, which may contribute to the  
56  
57  
58  
59  
60

1  
2  
3  
4 tumor growth, invasion and metastasis, was associated with the occurrence,  
5 development, and prognosis of cancers.[52, 53] Common components in peripheral  
6 blood, such as neutrophils, monocytes, platelets, and lymphocytes, are closely related  
7 to the biological behavior of tumor cells.[54] Numerous studies have shown that  
8 lymphocytes can inhibit tumor progression and metastasis, which play an important  
9 role in tumor immune monitoring.[55, 56] Lymphopenia is commonly seen in  
10 immune system defects caused by tumor cells. The possible mechanism is that  
11 lymphocytes can control growth of tumor cells through cytotoxicity and induction  
12 tumor cell apoptosis.[57] Another research showed that lymphocytes could inhibit  
13 tumor cell growth by secreting interferon-gamma and tumor necrosis factor- $\alpha$ . [58]  
14 Studies have found that the more infiltrating lymphocyte by tumor, the better  
15 prognosis of breast cancer patients.[59, 60] In addition, previous studies have reported  
16 that tumor-infiltrating lymphocyte can be used as a predictor of the response to  
17 neoadjuvant and adjuvant chemotherapy in breast cancer patients.[61, 62] On the  
18 other hand, platelets, as key actors in the process of inflammation, play important  
19 roles in tumor progression. Firstly, platelets can protect tumor cells in peripheral  
20 blood from high flow shear stress and immune attacks by aggregating and adhering to  
21 tumor cells.[63] Secondly, platelets could contribute tumor progression by secreting  
22 various cell growth factors, which could stimulate tumor angiogenesis and  
23 growth.[64-66] Thirdly, platelets could induce epithelial mesenchymal transition and  
24 impede cell-mediated immune clearance effects, leading to the tumor cell  
25 metastasis.[67] Therefore, high platelet count may be associated with poor prognosis  
26 of breast cancer patients.

27  
28  
29  
30  
31  
32  
33  
34  
35  
36  
37  
38  
39  
40  
41  
42  
43  
44  
45  
46  
47  
48  
49 Platelet-to-lymphocyte ratio (PLR), as a commonly used indicator of  
50 inflammatory status, could predict the prognosis of variant tumors. Elevated value of  
51 PLR, with a high platelet count and/or low lymphocyte count, often lead to a low  
52 antitumor activity and poor prognosis. Previous studies showed that PLR is  
53 significantly related to the survival of colorectal cancer, gastric cancer and liver  
54 cancer.[68-70] Gunduz et al. showed that elevated PLR value was associated with  
55  
56  
57  
58  
59  
60



1  
2  
3  
4 poor DFS in breast cancer.[71] However, Ulas et al. reported that there is no  
5  
6 association between PLR and DFS or OS in breast cancer.[72] What's more, when  
7  
8 subgroup analysis by different molecular types of breast cancer was performed, Koh  
9  
10 et al. found that elevated PLR could result in an increased risk of mortality in ER+  
11  
12 and HER2+ group but not in ER- and HER2+ group.[73] Studies focused on the  
13  
14 relationship between PLR and metastatic breast cancer could achieve positive results  
15  
16 easily.[74] However, the predictive efficacy of PLR in early stage breast cancer was  
17  
18 limited. The possible explanation is that inflammatory reaction may not be so obvious  
19  
20 in early breast cancer. Recently, many studies have be devoted to explore whether  
21  
22 PLR could be a predictor for locally advanced breast cancer treated with neoadjuvant  
23  
24 chemotherapy. Tekyol et al. found that PLR value was associated with chemotherapy  
25  
26 sensitivity and could serve as a predictive marker of the therapeutic effect of NACT  
27  
28 in breast cancer.[34] Similarly, Ouissam and Ma showed that PLR was associated  
29  
30 with OS and DFS in breast cancer treated with NACT.[43, 75] However, some other  
31  
32 studies reported that the PLR value has no significant predictive effect on pCR rate,  
33  
34 DFS or OS in breast cancer treated with NACT.[25, 49] So far, the above studies  
35  
36 indicated that the prognostic role and clinical value of PLR in locally advanced breast  
37  
38 cancer with NACT is still controversial.

39  
40 We conducted this meta-analysis to explore the predictive value of PLR in breast  
41  
42 cancer patients treated with NACT. Our results indicate that high PLR level was  
43  
44 significantly associated with low pCR rate (HR: 0.77, 95% CI: 0.67-0.88,  $p < 0.001$ ).  
45  
46 This finding is consistent with previous studies confirming that PLR may act as a  
47  
48 significant marker for predicting the effective of NACT in BC patients.[33, 34, 37] In  
49  
50 subgroup analysis, we found that PLR was only significantly associated with  
51  
52 Caucasian patients but not Asian patients. The possible explanations were the  
53  
54 differences in baseline PLR values due to different genetic backgrounds, different  
55  
56 chemotherapy regimens and doses. What's more, the heterogeneity of the Asian group  
57  
58 is also more obvious than that of the Caucasian group, which may lead to no  
59  
60 significance in the Asian group. Previous studies reported that high PLR value may



1  
2  
3  
4 indicate a lower pCR rate and poor prognosis of TNBC patients.[46] Subgroup  
5  
6 analysis by tumor subtypes in this meta-analysis including two studies showed no  
7  
8 significant association between PLR and pCR in the triple negative breast cancer  
9  
10 group. One of the reasons for the negative statistical significance is the small number  
11  
12 of included studies. On the other hand, TNBC is a heterogeneous disease that includes  
13  
14 several subtypes of tumors. There are differences in prognosis among the different  
15  
16 subtypes of TNBC.[44] Further more research is needed to evaluate the predictive  
17  
18 value of PLR in TNBC treated with NACT. How to identify the optimal critical value  
19  
20 for the clinical application of PLR may be a major concern for doctors. Unfortunately,  
21  
22 this value has not been determined for predicting the efficacy and prognosis of  
23  
24 neoadjuvant therapy in breast cancer patients. Because of the different phase of  
25  
26 evaluation of the blood sample or basic blood values of different populations, the  
27  
28 cutoff values of PLR were varied. Some studies reported that high PLR was  
29  
30 associated with poor prognosis using a cut-off value of 292 and 200,[76, 77] while  
31  
32 other studies did not find significant association between PLR and prognosis of breast  
33  
34 cancer patients with a cut-off value of 161, 107, and 160, respectively.[22, 37, 78]  
35  
36 Different studies use variant cut-off values from different methods. Traditionally, we  
37  
38 believe that the ROC curve is the most suitable for getting the optimal cutoff  
39  
40 value.[33, 43, 46-48] However, other studies have also achieved significant results  
41  
42 using the cut-off values from previous studies.[26, 28, 34] We performed subgroup  
43  
44 analysis to determine the effects of cut-off values and methods on the outcomes. The  
45  
46 results showed statistically significant relationship between PLR and pCR, no matter  
47  
48 the cut-off values obtained from ROC curves or previous studies. This result indicated  
49  
50 that the source and method of optimal cut-off values are not the key influence factors  
51  
52 for PLR acting as a predictive factor for breast cancer. On the other hand, our results  
53  
54 also showed that studies with cut-off value  $\geq 150$  showed a significant association  
55  
56 between the PLR and pCR, while cut-off values  $< 150$  did not achieve statistical  
57  
58 significance. Therefore, a higher cut-off value for PLR may increase its predictive  
59  
60 value for breast cancer patients. However, a higher cut-off value may lead to the

1  
2  
3  
4 omission of a large number of patient and reduce its predictive sensitivity in clinical  
5 practice.[79] Therefore, further researches are needed to determine the optimal cut-off  
6 value of PLR for future individualized treatment.  
7  
8

9  
10 We also evaluated the association between PLR and prognosis of breast cancer  
11 patients treated with NACT. Zhang et al. conducted a meta-analysis which including  
12 5542 breast cancer patients with different stages and indicated that high PLR level is  
13 significantly associated with poor OS and DFS of breast cancer patients.[80]  
14 However, the results were inconsistent when evaluated the prognosis value for  
15 NACT. Christophe et al. and Jiang et al. reported that the PLR value has no  
16 significant effect on DFS or OS in breast cancer treated with NACT.[25, 49]  
17 Contradictory results made by Ileana and Ouissam showed that PLR was associated  
18 with OS and DFS in breast cancer treated with NACT.[35, 43] In our study, the  
19 pooled results demonstrated that high PLR was significantly associated with poor OS  
20 and PFS in patients with breast cancer. Subgroup analyses by ethnicity, method and  
21 subtype showed the same results with no significant heterogeneity. The consistency of  
22 this result may be due to the fact that the included patients are all local advanced stage  
23 patients who have received NACT. Therefore, further studies are needed to evaluate  
24 the prognostic value of PLR in different clinical stages and molecular subtypes of  
25 breast cancer. What's more, this meta-analysis also explored the association between  
26 PLR and clinicopathological characteristics. Our results indicated that high PLR level  
27 was more common in young women and patients with premenopausal status. One  
28 possible explanation is that young people may have more lymphocyte and platelet  
29 reserves and a more sensitive inflammatory state. On the other hand, we also found  
30 that elevated PLR is associated with tumor stage, which indicated that PLR may be  
31 involved in the occurrence and progression of breast cancer. Some exploration  
32 experiments are needed to prove the mechanisms between PLR and breast cancer.  
33  
34  
35  
36  
37  
38  
39  
40  
41  
42  
43  
44  
45  
46  
47  
48  
49  
50  
51  
52  
53  
54

55 There are still several limitations to be considered in this meta-analysis. First, All  
56 of the studies included were retrospective, and some studies have incomplete data,  
57 which may have some impact on the final results. Second, the cut-off values of PLR  
58  
59  
60

1  
2  
3  
4 were inconsistent among the studies, some of them determined the optimum PLR  
5 value according to the previous studies instead of using ROC curve. Even if using  
6 ROC curve, the different phase of evaluation of the blood sample or basic blood  
7 values of different populations may also result in different cutoff values, which may  
8 lead to the introduction of selection bias in the meta-analysis. Third, breast cancer is a  
9 heterogeneous tumor with many subtypes. The biological behavior, malignant degree  
10 and immune response of different subtypes were varied. Variant molecular subtypes  
11 of breast cancer respond differently to neoadjuvant therapy, and the heterogeneity of  
12 the results may be affected for the lacking of relevant information about molecular  
13 typing in most studies. Finally, PLR may be influenced by some factors, including  
14 bacterial and viral infections, nutritional state and history of medication. These  
15 intrinsic factors were not statistically available and uncontrollable, which were  
16 unavoidable sources of heterogeneity in this meta-analysis. Further more studies were  
17 needed to accurately focus on the different subtype of breast cancer and provide more  
18 detailed clinicopathological information for stratified analysis, which may reduce  
19 heterogeneity to some extent.  
20  
21  
22  
23  
24  
25  
26  
27  
28  
29  
30  
31  
32  
33  
34

## 35 **Conclusions**

36  
37  
38 This study indicated that PLR level was associated with age, menopausal status  
39 and T stage of breast cancer patients. In addition, high PLR was significantly related  
40 to the low pCR rate, poor OS and PFS of breast cancer patients treated with  
41 neoadjuvant chemotherapy. Therefore, PLR can be used as a potential predictor  
42 biomarker for the efficacy of neoadjuvant chemotherapy. However, further high  
43 quality and well-designed studies with larger samples are needed to identify the  
44 optimal cut-off value of PLR and explore the mechanism of PLR with breast cancer.  
45  
46  
47  
48  
49  
50  
51  
52  
53  
54  
55  
56  
57  
58  
59  
60

## Abbreviations

HR: hazard ratio; OR: odds ratio; 95% CI: 95% confidence interval; Ph: p values of Q test for heterogeneity test; OS: overall survival; DFS: disease-free survival. PLR: platelet-lymphocyte ratio; BC: breast cancer; NACT: neoadjuvant chemotherapy; ROC: receiver operating characteristic curve; NOS: Newcastle-Ottawa Scale;

## Declarations

### Ethics approval and consent to participate

All the data supporting our findings in this paper were freely downloaded from the PubMed, EMBASE, Web of Science databases and the Cochrane Library. No ethical approval or written informed consent for participation was required.

### Consent for publication

Not applicable.

### Availability of data and materials

All data for this study are publicly available and are ready for the public to download at no cost from the official websites of the PubMed, EMBASE, Web of Science databases and the Cochrane Library. There is no need to have the formal permission to use data for this study. The sources and data robustness have been described in the section of "Methods".

### Competing interests

The authors declare that they have no competing interests.

## **Funding**

The work was supported by Medical Talent Program Foundation of Health and Family Planning Commission of Nantong (MA202009), Natural Science Foundation of Jiangsu Province (BK20191208).

## **Author Contributions**

XQ, JC and XZ were involved in drafting the manuscript. SW and JN made contributions to the concepts, acquisition and analysis of the data. LS was involved in acquisition of data and preparing the Figs. LY and CJ designed and revised the manuscript. All authors have read and approved the final manuscript.

## **Acknowledgements**

Not applicable.

## References

1. Siegel RL, Miller KD, Jemal A. Cancer statistics, 2020. *CA Cancer J Clin* 2020;70(1):7-30.
2. Fan L, Strasser-Weippl K, Li JJ, et al. Breast cancer in China. *Lancet Oncol* 2014;15(7):e279-89.
3. Wang M, Hou L, Chen M, et al. Neoadjuvant Chemotherapy Creates Surgery Opportunities For Inoperable Locally Advanced Breast Cancer. *Sci Rep* 2017;7:44673.
4. Sinacki M, Badzio A, Welnicka-Jaskiewicz M, et al. Pattern of care in locally advanced breast cancer: focus on local therapy. *Breast* 2011;20(2):145-50.
5. Kesson EM, Allardice GM, George WD, et al. Effects of multidisciplinary team working on breast cancer survival: retrospective, comparative, interventional cohort study of 13 722 women. *BMJ* 2012;344:e2718.
6. Wolmark N, Wang J, Mamounas E, et al. Preoperative chemotherapy in patients with operable breast cancer: nine-year results from National Surgical Adjuvant Breast and Bowel Project B-18. *J Natl Cancer Inst Monogr* 2001(30):96-102.
7. Nam K, Eisenbrey JR, Stanczak M, et al. Monitoring Neoadjuvant Chemotherapy for Breast Cancer by Using Three-dimensional Subharmonic Aided Pressure Estimation and Imaging with US Contrast Agents: Preliminary Experience. *Radiology* 2017;285(1):53-62.
8. Savaridas SL, Sim YT, Vinnicombe SJ, et al. Are baseline ultrasound and mammographic features associated with rates of pathological complete response in patients receiving neoadjuvant chemotherapy for breast cancer? *Cancer Imaging* 2019;19(1):67.
9. He Z, Song A, Zhang Z, et al. Comparative efficacy of non-pharmacological adjuvant therapies for quality of life in the patients with breast cancer receiving chemo- or radio-therapy: A protocol for systematic review and Bayesian network meta-analysis. *Medicine (Baltimore)* 2018;97(35):e12096.
10. Mieog JS, van der Hage JA, van de Velde CJ. Preoperative chemotherapy for women with operable breast cancer. *Cochrane Database Syst Rev* 2007;2007(2):CD005002.
11. von Minckwitz G, Untch M, Blohmer JU, et al. Definition and impact of pathologic complete response on prognosis after neoadjuvant chemotherapy in various intrinsic breast cancer subtypes. *J Clin Oncol* 2012;30(15):1796-804.
12. Gianni L, Pienkowski T, Im YH, et al. Efficacy and safety of neoadjuvant pertuzumab and trastuzumab in women with locally advanced, inflammatory, or early HER2-positive breast cancer (NeoSphere): a randomised multicentre, open-label, phase 2 trial. *Lancet Oncol* 2012;13(1):25-32.
13. Cortazar P, Zhang L, Untch M, et al. Pathological complete response and long-term clinical benefit in breast cancer: the CTNeoBC pooled analysis. *Lancet* 2014;384(9938):164-72.
14. Xu W, Chen X, Deng F, et al. Predictors of Neoadjuvant Chemotherapy Response in Breast Cancer: A Review. *Onco Targets Ther* 2020;13:5887-99.
15. Andre F, Dieci MV, Dubsy P, et al. Molecular pathways: involvement of immune pathways in the therapeutic response and outcome in breast cancer. *Clin Cancer Res* 2013;19(1):28-33.
16. Bianchini G, Gianni L. The immune system and response to HER2-targeted treatment in breast

- cancer. *Lancet Oncol* 2014;15(2):e58-68.
17. Aziz MH, Sideras K, Aziz NA, et al. The Systemic-immune-inflammation Index Independently Predicts Survival and Recurrence in Resectable Pancreatic Cancer and its Prognostic Value Depends on Bilirubin Levels: A Retrospective Multicenter Cohort Study. *Ann Surg* 2019;270(1):139-46.
  18. Tomita M, Shimizu T, Ayabe T, et al. Preoperative neutrophil to lymphocyte ratio as a prognostic predictor after curative resection for non-small cell lung cancer. *Anticancer Res* 2011;31(9):2995-8.
  19. Ishizuka M, Nagata H, Takagi K, et al. Combination of platelet count and neutrophil to lymphocyte ratio is a useful predictor of postoperative survival in patients with colorectal cancer. *Br J Cancer* 2013;109(2):401-7.
  20. Rossi L, Santoni M, Crabb SJ, et al. High neutrophil-to-lymphocyte ratio persistent during first-line chemotherapy predicts poor clinical outcome in patients with advanced urothelial cancer. *Ann Surg Oncol* 2015;22(4):1377-84.
  21. Luo G, Guo M, Liu Z, et al. Blood neutrophil-lymphocyte ratio predicts survival in patients with advanced pancreatic cancer treated with chemotherapy. *Ann Surg Oncol* 2015;22(2):670-6.
  22. Losada B, Guerra JA, Malon D, et al. Pretreatment neutrophil/lymphocyte, platelet/lymphocyte, lymphocyte/monocyte, and neutrophil/monocyte ratios and outcome in elderly breast cancer patients. *Clin Transl Oncol* 2019;21(7):855-63.
  23. Kim HY, Kim TH, Yoon HK, et al. The Role of Neutrophil-lymphocyte Ratio and Platelet-lymphocyte Ratio in Predicting Neoadjuvant Chemotherapy Response in Breast Cancer. *J Breast Cancer* 2019;22(3):425-38.
  24. Lusho S, Durando X, Mouret-Reynier MA, et al. Platelet-to-Lymphocyte Ratio Is Associated With Favorable Response to Neoadjuvant Chemotherapy in Triple Negative Breast Cancer: A Study on 120 Patients. *Front Oncol* 2021;11:678315.
  25. Van Berckelaer C, Vermeiren I, Vercauteren L, et al. The Evolution and Prognostic Role of Tumour-Infiltrating Lymphocytes and Peripheral Blood-Based Biomarkers in Inflammatory Breast Cancer Patients Treated with Neoadjuvant Chemotherapy. *Cancers (Basel)* 2021;13(18).
  26. Asano Y, Kashiwagi S, Onoda N, et al. Platelet-Lymphocyte Ratio as a Useful Predictor of the Therapeutic Effect of Neoadjuvant Chemotherapy in Breast Cancer. *PLoS One* 2016;11(7):e0153459.
  27. Peng Y, Chen R, Qu F, et al. Low pretreatment lymphocyte/monocyte ratio is associated with the better efficacy of neoadjuvant chemotherapy in breast cancer patients. *Cancer Biol Ther* 2020;21(2):189-96.
  28. Cuello-Lopez J, Fidalgo-Zapata A, Lopez-Agudelo L, et al. Platelet-to-lymphocyte ratio as a predictive factor of complete pathologic response to neoadjuvant chemotherapy in breast cancer. *PLoS One* 2018;13(11):e0207224.
  29. Cochran WG. The comparison of percentages in matched samples. *Biometrika* 1950;37(3-4):256-66.
  30. Higgins JP, Thompson SG, Deeks JJ, et al. Measuring inconsistency in meta-analyses. *BMJ* 2003;327(7414):557-60.
  31. Mantel N, Haenszel W. Statistical aspects of the analysis of data from retrospective studies of



- disease. *J Natl Cancer Inst* 1959;22(4):719-48.
32. Graziano V, Grassadonia A, Iezzi L, et al. Combination of peripheral neutrophil-to-lymphocyte ratio and platelet-to-lymphocyte ratio is predictive of pathological complete response after neoadjuvant chemotherapy in breast cancer patients. *Breast* 2019;44:33-38.
33. Sahin AB, Cubukcu E, Ocak B, et al. Low pan-immune-inflammation-value predicts better chemotherapy response and survival in breast cancer patients treated with neoadjuvant chemotherapy. *Sci Rep* 2021;11(1):14662.
34. Kaytaz Tekyol K, Gurleyik G, Aktas A, et al. Pathological Complete Response to Neoadjuvant Chemotherapy in Patients With Breast Cancer: The Relationship Between Inflammatory Biomarkers and Molecular Subtypes. *Cureus* 2021;13(4):e14774.
35. Corbeau I, Thezenas S, Maran-Gonzalez A, et al. Inflammatory Blood Markers as Prognostic and Predictive Factors in Early Breast Cancer Patients Receiving Neoadjuvant Chemotherapy. *Cancers (Basel)* 2020;12(9).
36. Eren T, Karacin C, Ucar G, et al. Correlation between peripheral blood inflammatory indicators and pathologic complete response to neoadjuvant chemotherapy in locally advanced breast cancer patients. *Medicine (Baltimore)* 2020;99(22):e20346.
37. Hu Y, Wang S, Ding N, et al. Platelet/Lymphocyte Ratio Is Superior to Neutrophil/Lymphocyte Ratio as a Predictor of Chemotherapy Response and Disease-free Survival in Luminal B-like (HER2(-)) Breast Cancer. *Clin Breast Cancer* 2020;20(4):e403-e09.
38. Ma Y, Zhang J, Chen X. Lymphocyte-to-Monocyte Ratio is Associated with the Poor Prognosis of Breast Cancer Patients Receiving Neoadjuvant Chemotherapy. *Cancer Manag Res* 2021;13:1571-80.
39. Alan O, Akin Telli T, Aktas B, et al. Is insulin resistance a predictor for complete response in breast cancer patients who underwent neoadjuvant treatment? *World J Surg Oncol* 2020;18(1):242.
40. Jiang C, Lu Y, Zhang S, et al. Systemic Immune-Inflammation Index Is Superior to Neutrophil to Lymphocyte Ratio in Prognostic Assessment of Breast Cancer Patients Undergoing Neoadjuvant Chemotherapy. *Biomed Res Int* 2020;2020:7961568.
41. Acikgoz O, Yildiz A, Bilici A, et al. Pretreatment platelet-to-lymphocyte ratio and neutrophil-to-lymphocyte ratio as a predictor of pathological complete response to neoadjuvant chemotherapy in patients with breast cancer: single center experience from Turkey. *Anticancer Drugs* 2022;33(10):1150-55.
42. Kim R, Kawai A, Wakisaka M, et al. Immune factors associated with the pathological and therapeutic effects of preoperative chemotherapy in patients with breast cancer. *Transl Oncol* 2021;14(1):100927.
43. Al Jarroudi O, El Bairi K, Abda N, et al. Neutrophil-to-lymphocyte and platelet-to-lymphocyte ratios as predictors of outcomes in inflammatory breast cancer. *Biomark Med* 2021;15(14):1289-98.
44. Chung WS, Chen SC, Ko TM, et al. An Integrative Clinical Model for the Prediction of Pathological Complete Response in Patients with Operable Stage II and Stage III Triple-Negative Breast Cancer Receiving Neoadjuvant Chemotherapy. *Cancers (Basel)* 2022;14(17).
45. Jin X, Wang K, Shao X, et al. Prognostic implications of the peripheral platelet-to-lymphocyte ratio and neutrophil-to-lymphocyte ratio in predicting pathologic complete response after neoadjuvant chemotherapy in breast cancer patients. *Gland Surg* 2022;11(6):1057-66.



- 1
- 2
- 3
- 4 46. Lou C, Jin F, Zhao Q, et al. Correlation of serum NLR, PLR and HALP with efficacy of neoadjuvant
- 5 chemotherapy and prognosis of triple-negative breast cancer. *Am J Transl Res*
- 6 2022;14(5):3240-46.
- 7
- 8 47. Yang G, Liu P, Zheng L, et al. Novel peripheral blood parameters as predictors of neoadjuvant
- 9 chemotherapy response in breast cancer. *Front Surg* 2022;9:1004687.
- 10
- 11 48. Acikgoz O, Yildiz A, Bilici A, et al. Pretreatment platelet-to-lymphocyte ratio and
- 12 neutrophil-to-lymphocyte ratio as a predictor of pathological complete response to
- 13 neoadjuvant chemotherapy in patients with breast cancer: single center experience from
- 14 Turkey. *Anticancer Drugs* 2022;33(10):1150-55.
- 15
- 16 49. Jiang C, Zhang S, Qiao K, et al. The Pretreatment Systemic Inflammation Response Index as a
- 17 Useful Prognostic Factor is Better Than Lymphocyte to Monocyte Ratio in Breast Cancer
- 18 Patients Receiving Neoadjuvant Chemotherapy. *Clin Breast Cancer* 2022;22(5):424-38.
- 19
- 20 50. Song D, Li X, Zhang X. Expression and prognostic value of ratios of platelet lymphocyte, neutrophil
- 21 lymphocyte and lymphocyte monocyte in breast cancer patients. *Am J Transl Res*
- 22 2022;14(5):3233-39.
- 23
- 24 51. Mamounas EP, Fisher B. Preoperative (neoadjuvant) chemotherapy in patients with breast cancer.
- 25 *Semin Oncol* 2001;28(4):389-99.
- 26
- 27 52. Wang K, Shen T, Siegal GP, et al. The CD4/CD8 ratio of tumor-infiltrating lymphocytes at the
- 28 tumor-host interface has prognostic value in triple-negative breast cancer. *Hum Pathol*
- 29 2017;69:110-17.
- 30
- 31 53. Liu C, Sun B, Xu B, et al. A panel containing PD-1, IL-2Ralpha, IL-10, and CA15-3 as a biomarker to
- 32 discriminate breast cancer from benign breast disease. *Cancer Manag Res*
- 33 2018;10:1749-61. ]
- 34
- 35 54. Wellenstein MD, Coffelt SB, Duits DEM, et al. Loss of p53 triggers WNT-dependent systemic
- 36 inflammation to drive breast cancer metastasis. *Nature* 2019;572(7770):538-42.
- 37
- 38 55. Dunn GP, Old LJ, Schreiber RD. The immunobiology of cancer immunosurveillance and
- 39 immunoediting. *Immunity* 2004;21(2):137-48.
- 40
- 41 56. Ownby HE, Roi LD, Isenberg RR, et al. Peripheral lymphocyte and eosinophil counts as indicators of
- 42 prognosis in primary breast cancer. *Cancer* 1983;52(1):126-30.
- 43
- 44 57. Hiraoka K, Miyamoto M, Cho Y, et al. Concurrent infiltration by CD8+ T cells and CD4+ T cells is a
- 45 favourable prognostic factor in non-small-cell lung carcinoma. *Br J Cancer* 2006;94(2):275-80.
- 46
- 47 58. Mijic S, Dabrosin C. Platelet Activation In Situ in Breasts at High Risk of Cancer: Relationship with
- 48 Mammographic Density and Estradiol. *J Clin Endocrinol Metab* 2021;106(2):485-500.
- 49
- 50 59. Kotoula V, Chatzopoulos K, Lakis S, et al. Tumors with high-density tumor infiltrating lymphocytes
- 51 constitute a favorable entity in breast cancer: a pooled analysis of four prospective adjuvant
- 52 trials. *Oncotarget* 2016;7(4):5074-87.
- 53
- 54 60. Ibrahim EM, Al-Foheidi ME, Al-Mansour MM, et al. The prognostic value of tumor-infiltrating
- 55 lymphocytes in triple-negative breast cancer: a meta-analysis. *Breast Cancer Res Treat*
- 56 2014;148(3):467-76.
- 57
- 58 61. Seo AN, Lee HJ, Kim EJ, et al. Tumour-infiltrating CD8+ lymphocytes as an independent predictive
- 59 factor for pathological complete response to primary systemic therapy in breast cancer. *Br J*
- 60 *Cancer* 2013;109(10):2705-13.

- 1  
2  
3 response to neoadjuvant chemotherapy in breast cancer: a systematic review and  
4 meta-analysis. *PLoS One* 2014;9(12):e115103.  
5  
6 63. Yang R, Chang Q, Meng X, et al. Prognostic value of Systemic immune-inflammation index in  
7 cancer: A meta-analysis. *J Cancer* 2018;9(18):3295-302.  
8  
9 64. Egan K, Crowley D, Smyth P, et al. Platelet adhesion and degranulation induce pro-survival and  
10 pro-angiogenic signalling in ovarian cancer cells. *PLoS One* 2011;6(10):e26125.  
11  
12 65. Kono SA, Heasley LE, Doebele RC, et al. Adding to the mix: fibroblast growth factor and  
13 platelet-derived growth factor receptor pathways as targets in non-small cell lung cancer.  
14 *Curr Cancer Drug Targets* 2012;12(2):107-23.  
15  
16 66. Klinger MH, Jelkmann W. Role of blood platelets in infection and inflammation. *J Interferon*  
17 *Cytokine Res* 2002;22(9):913-22.  
18  
19 67. Floris G, Richard F, Hamy AS, et al. Body Mass Index and Tumor-Infiltrating Lymphocytes in  
20 Triple-Negative Breast Cancer. *J Natl Cancer Inst* 2021;113(2):146-53.  
21  
22 68. Liu C, Li X. Stage-Dependent Changes in Albumin, NLR, PLR, and AFR are Correlated with Shorter  
23 Survival in Patients with Gastric Cancer. *Clin Lab* 2019;65(9).  
24  
25 69. Solak Mekic M, Pedisic I, Sobat H, et al. The Role of Complete Blood Count Parameters in Patients  
26 with Colorectal Cancer. *Acta Clin Croat* 2018;57(4):624-29.  
27  
28 70. Suner A, Carr BI, Akkiz H, et al. C-Reactive Protein and Platelet-Lymphocyte Ratio as Potential  
29 Tumor Markers in Low-Alpha-Fetoprotein Hepatocellular Carcinoma. *Oncology*  
30 2019;96(1):25-32.  
31  
32 71. Gunduz S, Goksu SS, Arslan D, et al. Factors affecting disease-free survival in patients with human  
33 epidermal growth factor receptor 2-positive breast cancer who receive adjuvant  
34 trastuzumab. *Mol Clin Oncol* 2015;3(5):1109-12.  
35  
36 72. Ulas A, Avci N, Kos T, et al. Are neutrophil/lymphocyte ratio and platelet/lymphocyte ratio  
37 associated with prognosis in patients with HER2-positive early breast cancer receiving  
38 adjuvant trastuzumab? *J BUON* 2015;20(3):714-22.  
39  
40 73. Koh CH, Bhoo-Pathy N, Ng KL, et al. Utility of pre-treatment neutrophil-lymphocyte ratio and  
41 platelet-lymphocyte ratio as prognostic factors in breast cancer. *Br J Cancer*  
42 2015;113(1):150-8.  
43  
44 74. Koh YW, Lee HJ, Ahn JH, et al. Prognostic significance of the ratio of absolute neutrophil to  
45 lymphocyte counts for breast cancer patients with ER/PR-positivity and HER2-negativity in  
46 neoadjuvant setting. *Tumour Biol* 2014;35(10):9823-30.  
47  
48 75. Ma R, Wei W, Ye H, et al. A nomogram based on platelet-to-lymphocyte ratio for predicting  
49 pathological complete response of breast cancer after neoadjuvant chemotherapy. *BMC*  
50 *Cancer* 2023;23(1):245.  
51  
52 76. Fujimoto Y, Ozawa H, Higuchi T, et al. Improved prognosis of low baseline  
53 neutrophil-to-lymphocyte ratio is significantly exclusive in breast cancer patients with high  
54 absolute counts of lymphocytes. *Mol Clin Oncol* 2019;10(2):275-84.  
55  
56 77. Hong J, Mao Y, Chen X, et al. Elevated preoperative neutrophil-to-lymphocyte ratio predicts poor  
57 disease-free survival in Chinese women with breast cancer. *Tumour Biol* 2016;37(3):4135-42.  
58  
59 78. Marin Hernandez C, Pinero Madrona A, Gil Vazquez PJ, et al. Usefulness of  
60 lymphocyte-to-monocyte, neutrophil-to-monocyte and neutrophil-to-lymphocyte ratios as  
prognostic markers in breast cancer patients treated with neoadjuvant chemotherapy. *Clin*

1  
2  
3  
4  
5  
6  
7  
8  
9  
10  
11  
12  
13  
14  
15  
16  
17  
18  
19  
20  
21  
22  
23  
24  
25  
26  
27  
28  
29  
30  
31  
32  
33  
34  
35  
36  
37  
38  
39  
40  
41  
42  
43  
44  
45  
46  
47  
48  
49  
50  
51  
52  
53  
54  
55  
56  
57  
58  
59  
60

*Transl Oncol* 2018;20(4):476-83.

79. Jia W, Wu J, Jia H, et al. The Peripheral Blood Neutrophil-To-Lymphocyte Ratio Is Superior to the Lymphocyte-To-Monocyte Ratio for Predicting the Long-Term Survival of Triple-Negative Breast Cancer Patients. *PLoS One* 2015;10(11):e0143061.

80. Zhang M, Huang XZ, Song YX, et al. High Platelet-to-Lymphocyte Ratio Predicts Poor Prognosis and Clinicopathological Characteristics in Patients with Breast Cancer: A Meta-Analysis. *Biomed Res Int* 2017;2017:9503025.

For peer review only

**Table 1. Meta-analysis of the association between PLR and pCR of BC with NACT.**

| Factors          | No. of studies | No. of patients | Effects model | OR (95% CI)     | p      | Heterogeneity  |                |
|------------------|----------------|-----------------|---------------|-----------------|--------|----------------|----------------|
|                  |                |                 |               |                 |        | I <sup>2</sup> | P <sub>H</sub> |
| <b>Overall</b>   | 19             | 4301            | Random        | 0.77(0.67-0.88) | <0.001 | 75.80%         | <0.001         |
| <b>Ethnicity</b> |                |                 |               |                 |        |                |                |
| Caucasian        | 11             | 2350            | Random        | 0.77(0.68-0.88) | <0.001 | 61.60%         | 0.004          |
| Asian            | 8              | 1951            | Random        | 0.83(0.58-1.17) | 0.288  | 85.00%         | <0.001         |
| <b>Method</b>    |                |                 |               |                 |        |                |                |
| Previous study   | 6              | 984             | Fixed         | 0.86(0.78-0.94) | 0.001  | 39.30%         | 0.144          |
| ROC              | 12             | 2337            | Random        | 0.72(0.57-0.92) | 0.008  | 81.10%         | <0.001         |
| <b>Subtype</b>   |                |                 |               |                 |        |                |                |
| All              | 14             | 2964            | Random        | 0.76(0.64-0.89) | 0.001  | 74.00%         | <0.001         |
| IBC              | 2              | 177             | Fixed         | 0.83(0.70-0.97) | 0.021  | 0.00%          | 0.368          |
| TNBC             | 2              | 180             | Random        | 0.91(0.26-3.21) | 0.885  | 94.70%         | <0.001         |
| Luminal B        | 1              | 980             | Fixed         | 0.76(0.61-0.94) | 0.013  | —              | —              |
| <b>Cut-off</b>   |                |                 |               |                 |        |                |                |
| <150             | 9              | 2041            | Random        | 0.80(0.59-1.10) | 0.172  | 82.90%         | <0.001         |
| >=150            | 9              | 1280            | Random        | 0.78(0.67-0.91) | 0.001  | 68.20%         | 0.001          |

**Abbreviations:** ROC: receiver operating characteristic curve; IBC: inflammatory breast cancer; TNBC: triple negative breast cancer; OR: odds ratio; 95% CI: 95% confidence interval;  $P_h$ :  $p$  values of Q test for heterogeneity test.

Table 2. Meta-analysis of the association between PLR and OS, DFS of BC with NACT.

|            | Factors          | No. of studies | No. of patients | Effects model      | HR (95% CI)        | p      | Heterogeneity  |                |
|------------|------------------|----------------|-----------------|--------------------|--------------------|--------|----------------|----------------|
|            |                  |                |                 |                    |                    |        | I <sup>2</sup> | P <sub>H</sub> |
| <b>OS</b>  | <b>Overall</b>   | 5              | 912             | Fixed              | 1.898(1.394-2.586) | <0.001 | 7.40%          | 0.365          |
|            | <b>Ethnicity</b> |                |                 |                    |                    |        |                |                |
|            | Caucasian        | 3              | 383             | Fixed              | 1.845(1.258-2.706) | 0.002  | 0.00%          | 0.378          |
|            | Asian            | 2              | 529             | Fixed              | 2.002(1.187-3.377) | 0.009  | 56.70%         | 0.128          |
|            | <b>Method</b>    |                |                 |                    |                    |        |                |                |
|            | Previous study   | 2              | 281             | Fixed              | 1.579(0.973-2.564) | 0.065  | 0.00%          | 0.345          |
|            | ROC              | 3              | 631             | Fixed              | 2.153(1.442-3.216) | <0.001 | 19.80%         | 0.288          |
|            | <b>Subtype</b>   |                |                 |                    |                    |        |                |                |
|            | All              | 3              | 735             | Fixed              | 1.922(1.306-2.828) | 0.001  | 15.30%         | 0.307          |
| IBC        | 2                | 177            | Fixed           | 1.857(1.110-3.109) | <0.018             | 48.60% | 0.163          |                |
| <b>DFS</b> | <b>Overall</b>   | 7              | 1887            | Fixed              | 1.972(1.557-2.499) | <0.001 | 0.00%          | 0.460          |
|            | <b>Ethnicity</b> |                |                 |                    |                    |        |                |                |
|            | Caucasian        | 3              | 383             | Fixed              | 2.001(1.415-2.831) | <0.001 | 0.00%          | 0.568          |
|            | Asian            | 4              | 1504            | Fixed              | 1.948(1.409-2.692) | <0.001 | 33.90%         | 0.209          |
|            | <b>Method</b>    |                |                 |                    |                    |        |                |                |
|            | Previous study   | 3              | 458             | Fixed              | 1.990(1.374-2.884) | <0.001 | 0.00%          | 0.513          |
|            | ROC              | 3              | 449             | Fixed              | 2.544(1.614-4.010) | <0.001 | 1.50%          | 0.362          |
|            | <b>Subtype</b>   |                |                 |                    |                    |        |                |                |
|            | All              | 4              | 730             | Fixed              | 2.260(1.576-3.240) | <0.001 | 0.00%          | 0.407          |
| IBC        | 2                | 177            | Fixed           | 2.086(1.295-3.361) | 0.003              | 6.50%  | 0.301          |                |
| Luminal B  | 1                | 980            | Fixed           | 1.576(1.039-2.390) | 0.032              | —      | —              |                |

**Abbreviations:** ROC: receiver operating characteristic curve; IBC: inflammatory breast cancer; HR: hazard ratio; 95% CI: 95% confidence interval;  $P_h$ :  $p$  values of Q test for heterogeneity test.

## Figure legends

**Figure 1: The forest plot between elevated PLR and pCR in BC with NACT. The results showed that high PLR is significantly related to the low pCR rate.**

**Figure 2: Sensitivity analysis and Begg's funnel plot of publication bias test of PLR for pCR in BC with NACT. (A): Sensitivity analysis plot showed that all the included studies are near the central line with no clear deviation, suggesting that the results are statistically robust. (B): The funnel plots did not reveal obvious evidence of asymmetry.**

## Supplemental files

**Table S1. Characteristics of included studies in meta-analysis.**

**Table S2. Meta-analysis of the association between PLR and clinicopathological parameters of BC with NACT.**

**Figure S1: The flow diagram of publications selection.**

**Figure S2: The forest plot between elevated PLR and OS in BC with NACT.**

**Figure S3: The forest plot between elevated PLR and DFS in BC with NACT.**



Figure 1

461x372mm (96 x 96 DPI)



Figure 2

295x111mm (192 x 192 DPI)





1  
2  
3  
4  
5  
6  
7  
8  
9  
10  
11  
12  
13  
14  
15  
16  
17  
18  
19  
20  
21  
22  
23  
24  
25  
26  
27  
28  
29  
30  
31  
32  
33  
34  
35  
36  
37  
38  
39  
40  
41  
42  
43  
44  
45  
46

1  
2  
3  
4  
5  
6  
7  
8  
9  
10  
11  
12  
13  
14  
15  
16  
17  
18  
19  
20  
21  
22  
23  
24  
25  
26  
27  
28  
29  
30  
31  
32  
33  
34  
35  
36  
37  
38  
39  
40  
41  
42  
43  
44  
45  
46



1  
2  
3  
4  
5  
6  
7  
8  
9  
10  
11  
12  
13  
14  
15  
16  
17  
18  
19  
20  
21  
22  
23  
24  
25  
26  
27  
28  
29  
30  
31  
32  
33  
34  
35  
36  
37  
38  
39  
40  
41  
42  
43  
44  
45  
46

| Study | HR (95% CI) | Weight |
|-------|-------------|--------|
|-------|-------------|--------|

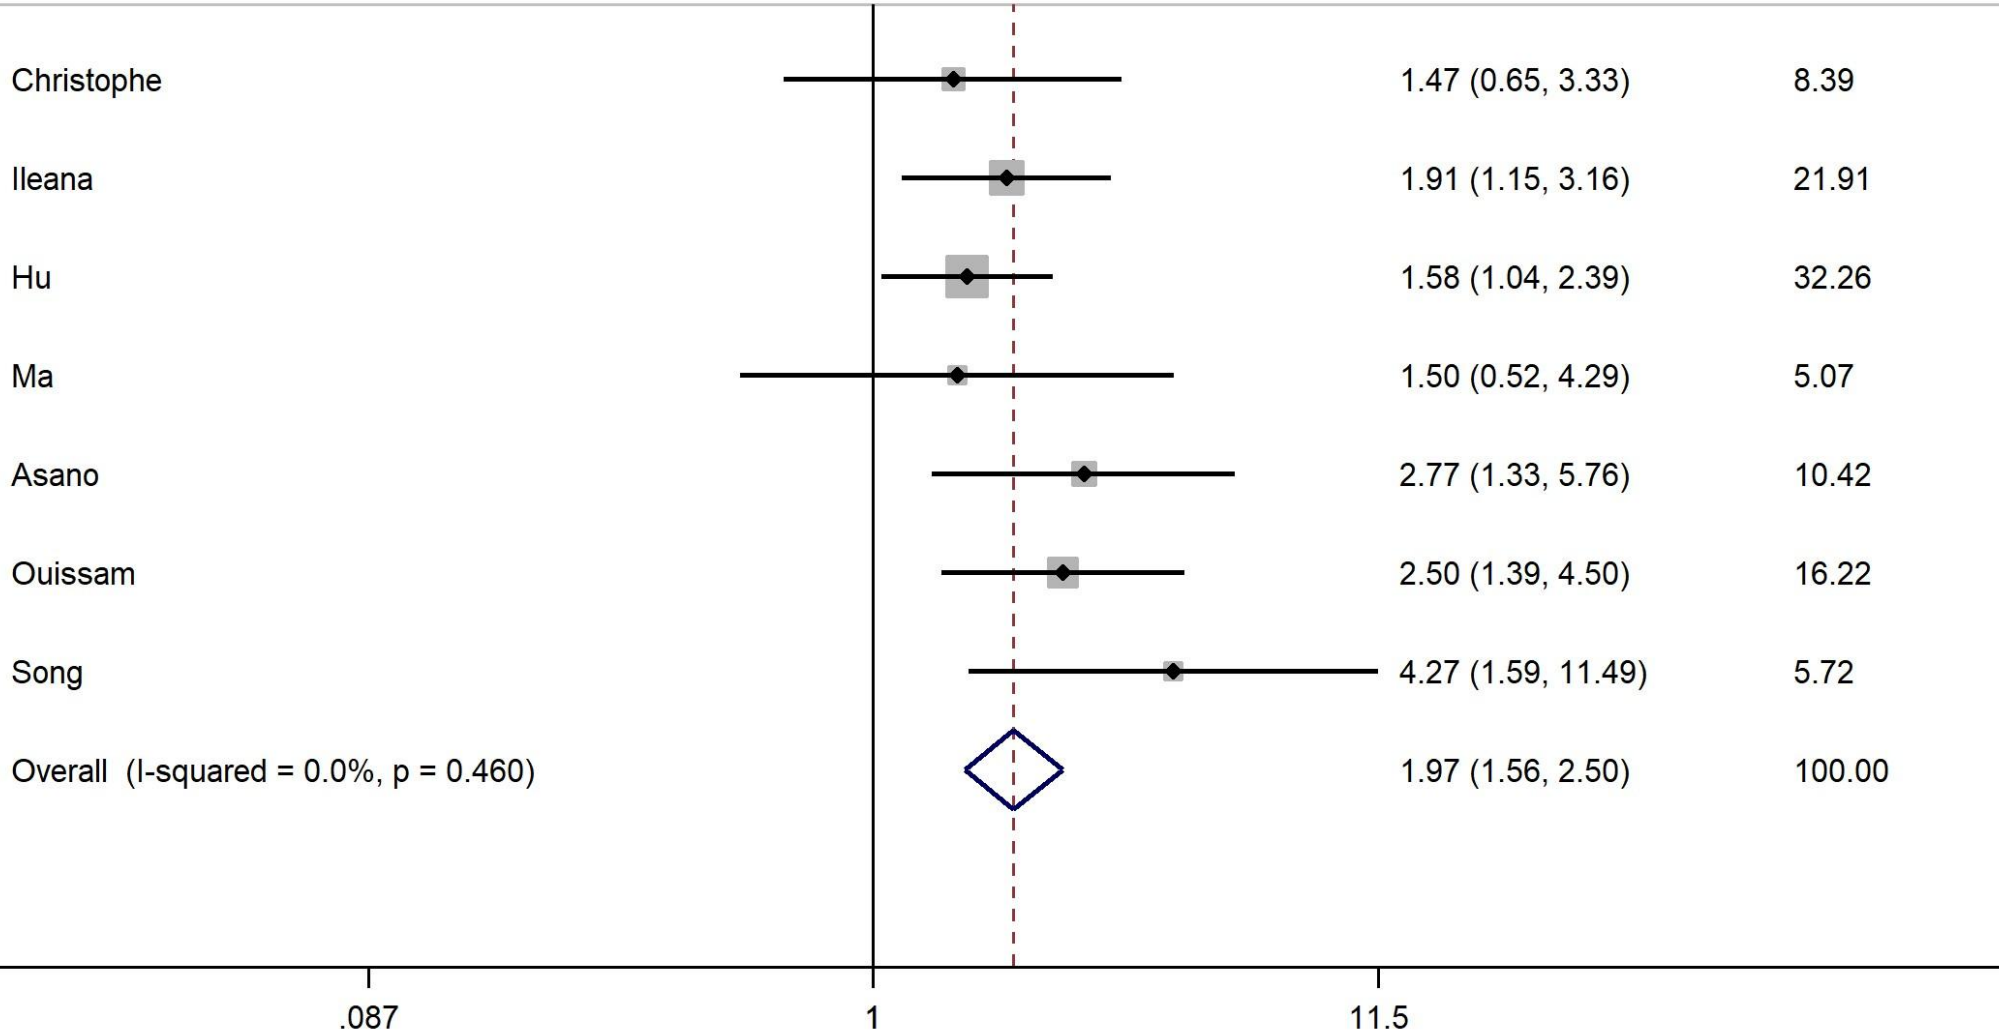

**Table S1. Characteristics of included studies in meta-analysis.**

| NO. | Author     | Year | Country | Ethnicity | Study design  | Study period | Subtype   | Patients (n) | Median age (years) | Follow-up (month)  | Cut-off value | Method         | Outcomes   | NOS score |
|-----|------------|------|---------|-----------|---------------|--------------|-----------|--------------|--------------------|--------------------|---------------|----------------|------------|-----------|
| 1   | Asano      | 2016 | Japan   | Asian     | retrospective | 2007-2013    | All       | 177          | NA                 | 3.4 (0.6-6.0)      | 150           | Previous study | pCR/DFS    | 8         |
| 2   | Vincenzo   | 2018 | Italy   | Caucasian | retrospective | 1999-2018    | All       | 373          | 50 (26-82)         | NA                 | 104.47        | ROC            | pCR        | 6         |
| 3   | Losada     | 2018 | Spain   | Caucasian | retrospective | 2004-2018    | All       | 104          | 71 (65-89)         | 48 (6-149)         | 150           | Previous study | pCR/DFS    | 8         |
| 4   | Javier     | 2018 | America | Caucasian | retrospective | 2013-2016    | All       | 272          | 51 (27-85)         | NA                 | 150           | Previous study | pCR        | 6         |
| 5   | Peng       | 2019 | China   | Asian     | retrospective | 2013-2017    | All       | 808          | 50 (20-72)         | NA                 | 151.3         | ROC            | pCR+PR     | 6         |
| 6   | Ileana     | 2020 | France  | Caucasian | retrospective | 2005-2013    | All       | 206          | 50.3 (25.3-76.6)   | 80.4 (2.4-135.6)   | 150           | Previous study | pCR/OS/DFS | 8         |
| 7   | Tulay      | 2020 | Turkey  | Caucasian | retrospective | 2009-2018    | All       | 131          | 49 (23-74)         | NA                 | 119           | ROC            | pCR        | 6         |
| 8   | Hu         | 2020 | China   | Asian     | retrospective | 2012-2016    | Luminal B | 980          | NA                 | 37 (5-77)          | NA            | NA             | pCR/DFS    | 8         |
| 9   | Alan       | 2020 | Turkey  | Caucasian | retrospective | 2015-2017    | All       | 55           | 48.5 (27-80)       | 41 (15-49)         | 225.3         | ROC            | pCR        | 7         |
| 10  | Jiang      | 2020 | China   | Asian     | retrospective | 2014-2018    | All       | 249          | 51                 | 4-72               | 88.23         | ROC            | pCR/OS     | 8         |
| 11  | Christophe | 2021 | France  | Caucasian | retrospective | 1996-2016    | IBC       | 75           | NA                 | 124.8 (68.5-166.8) | 150           | Previous study | pCR/OS/DFS | 8         |
| 12  | Ahmet      | 2021 | Turkey  | Caucasian | retrospective | 2008-2019    | All       | 743          | 48 (22.0-83.5)     | 67.5 (10.5-194.4)  | 131.8         | ROC            | pCR        | 7         |
| 13  | Kübra      | 2021 | Turkey  | Caucasian | retrospective | 2016-2020    | All       | 150          | 45.6               | NA                 | 150           | Previous study | pCR        | 6         |
| 14  | Ma         | 2021 | China   | Asian     | retrospective | 2017-2018    | All       | 203          | NA                 | 31 (1-39)          | 135           | ROC            | pCR/DFS    | 8         |
| 15  | Ouissam    | 2021 | Morocco | Caucasian | retrospective | 2010-2014    | IBC       | 102          | 49 (29-88)         | NA                 | 178           | ROC            | pCR/OS/DFS | 7         |
| 16  | Cong       | 2022 | China   | Asian     | retrospective | 2012-2016    | All       | 280          | 49                 | NA                 | 155           | ROC            | pCR/OS     | 7         |
| 17  | Chung      | 2022 | China   | Asian     | retrospective | 2012-2019    | TNBC      | 88           | 51                 | NA                 | 148.14        | ROC            | pCR        | 6         |
| 18  | Jin        | 2022 | China   | Asian     | retrospective | 2014-2019    | All       | 67           | 51 (27-81)         | NA                 | 106.3         | ROC            | pCR        | 6         |
| 19  | Song       | 2022 | China   | Asian     | retrospective | 2016-2018    | All       | 144          | 50.4               | 32 (1-40)          | 158.365       | ROC            | DFS        | 8         |
| 20  | Lou        | 2022 | China   | Asian     | retrospective | 2015-2018    | TNBC      | 92           | 52.3 (29-67)       | NA                 | 141.36        | ROC            | pCR        | 6         |
| 21  | Yang       | 2022 | China   | Asian     | retrospective | 2020-2022    | All       | 95           | NA                 | NA                 | 118.78        | ROC            | pCR        | 6         |
| 22  | Acikgoz    | 2022 | Turkey  | Caucasian | retrospective | 2014-2019    | All       | 139          | 45 (25-75)         | 39.5 (7.5-93)      | 181.7         | ROC            | pCR        | 7         |

**Abbreviations:** NA: not available; OS: overall survival; DFS: disease-free survival; pCR: pathologic complete response; ROC: receiver operating characteristic curve; NOS: Newcastle-Ottawa Scale.

**Table S2. Meta-analysis of the association between PLR and clinicopathological parameters of BC with NACT.**

| Variable                                        | No. of studies | No. of patients | Effects model | OR (95% CI)     | P      | Heterogeneity I <sup>2</sup> | P <sub>H</sub> |
|-------------------------------------------------|----------------|-----------------|---------------|-----------------|--------|------------------------------|----------------|
| Age (Yong vs. Old)                              | 9              | 3273            | Fixed         | 0.86(0.79-0.93) | <0.001 | 40.60%                       | 0.096          |
| Histologic type (Ductal vs. Others)             | 4              | 1520            | Fixed         | 0.97(0.94-1.01) | 0.147  | 7.20%                        | 0.357          |
| Grade (G1+G2 vs. G3+unknown)                    | 4              | 1692            | Fixed         | 0.96(0.91-1.02) | 0.203  | 0.00%                        | 0.439          |
| T stage (T1–T2 vs. T3–T4)                       | 6              | 2178            | Random        | 1.05(1.00-1.11) | 0.035  | 70.30%                       | 0.005          |
| Lymph node metastasis (No vs. Yes)              | 5              | 2341            | Fixed         | 0.97(0.88-1.06) | 0.440  | 0.00%                        | 0.952          |
| ki-67 (<14 vs. ≥14)                             | 7              | 2783            | Fixed         | 0.99(0.90-1.09) | 0.771  | 0.00%                        | 0.458          |
| Hormone Receptor (– vs. +)                      | 6              | 2049            | Fixed         | 0.94(0.84-1.06) | 0.309  | 0.00%                        | 0.526          |
| HER-2 (– vs. +)                                 | 7              | 2023            | Random        | 0.91(0.76-1.09) | 0.293  | 69.20%                       | 0.003          |
| Molecular subtype (Luminal vs. TriNeg + HER-2+) | 8              | 2143            | Fixed         | 0.99(0.92-1.07) | 0.845  | 15.20%                       | 0.310          |
| Menopausal status (Pre vs. Post)                | 5              | 1604            | Fixed         | 0.83(0.76-0.90) | <0.001 | 50.80%                       | 0.087          |

**Abbreviations:** OR: odds ratio; 95% CI: 95% confidence interval;  $P_h$ :  $p$  values of Q test for heterogeneity test.

## MOOSE Checklist for Meta-analyses of Observational Studies

| Item No                                     | Recommendation                                                                                                                                                                                                                                                               | Reported on Page No |
|---------------------------------------------|------------------------------------------------------------------------------------------------------------------------------------------------------------------------------------------------------------------------------------------------------------------------------|---------------------|
| Reporting of background should include      |                                                                                                                                                                                                                                                                              |                     |
| 1                                           | Problem definition                                                                                                                                                                                                                                                           | 4                   |
| 2                                           | Hypothesis statement                                                                                                                                                                                                                                                         | 5                   |
| 3                                           | Description of study outcome(s)                                                                                                                                                                                                                                              | 5                   |
| 4                                           | Type of exposure or intervention used                                                                                                                                                                                                                                        | 5                   |
| 5                                           | Type of study designs used                                                                                                                                                                                                                                                   | 5                   |
| 6                                           | Study population                                                                                                                                                                                                                                                             | 5                   |
| Reporting of search strategy should include |                                                                                                                                                                                                                                                                              |                     |
| 7                                           | Qualifications of searchers (eg, librarians and investigators)                                                                                                                                                                                                               | 6                   |
| 8                                           | Search strategy, including time period included in the synthesis and key words                                                                                                                                                                                               | 5                   |
| 9                                           | Effort to include all available studies, including contact with authors                                                                                                                                                                                                      | 6                   |
| 10                                          | Databases and registries searched                                                                                                                                                                                                                                            | 5                   |
| 11                                          | Search software used, name and version, including special features used (eg, explosion)                                                                                                                                                                                      | 5                   |
| 12                                          | Use of hand searching (eg, reference lists of obtained articles)                                                                                                                                                                                                             | 5                   |
| 13                                          | List of citations located and those excluded, including justification                                                                                                                                                                                                        | 5                   |
| 14                                          | Method of addressing articles published in languages other than English                                                                                                                                                                                                      | 5                   |
| 15                                          | Method of handling abstracts and unpublished studies                                                                                                                                                                                                                         | 5                   |
| 16                                          | Description of any contact with authors                                                                                                                                                                                                                                      | 5                   |
| Reporting of methods should include         |                                                                                                                                                                                                                                                                              |                     |
| 17                                          | Description of relevance or appropriateness of studies assembled for assessing the hypothesis to be tested                                                                                                                                                                   | 6                   |
| 18                                          | Rationale for the selection and coding of data (eg, sound clinical principles or convenience)                                                                                                                                                                                | 6                   |
| 19                                          | Documentation of how data were classified and coded (eg, multiple raters, blinding and interrater reliability)                                                                                                                                                               | 6                   |
| 20                                          | Assessment of confounding (eg, comparability of cases and controls in studies where appropriate)                                                                                                                                                                             | 6                   |
| 21                                          | Assessment of study quality, including blinding of quality assessors, stratification or regression on possible predictors of study results                                                                                                                                   | 6                   |
| 22                                          | Assessment of heterogeneity                                                                                                                                                                                                                                                  | 6-7                 |
| 23                                          | Description of statistical methods (eg, complete description of fixed or random effects models, justification of whether the chosen models account for predictors of study results, dose-response models, or cumulative meta-analysis) in sufficient detail to be replicated | 6-7                 |
| 24                                          | Provision of appropriate tables and graphics                                                                                                                                                                                                                                 | 26                  |
| Reporting of results should include         |                                                                                                                                                                                                                                                                              |                     |
| 25                                          | Graphic summarizing individual study estimates and overall estimate                                                                                                                                                                                                          | 26                  |
| 26                                          | Table giving descriptive information for each study included                                                                                                                                                                                                                 | 26                  |
| 27                                          | Results of sensitivity testing (eg, subgroup analysis)                                                                                                                                                                                                                       | 10                  |
| 28                                          | Indication of statistical uncertainty of findings                                                                                                                                                                                                                            | 10                  |

| Item No                                 | Recommendation                                                                                                            | Reported on Page No |
|-----------------------------------------|---------------------------------------------------------------------------------------------------------------------------|---------------------|
| Reporting of discussion should include  |                                                                                                                           |                     |
| 29                                      | Quantitative assessment of bias (eg, publication bias)                                                                    | 10                  |
| 30                                      | Justification for exclusion (eg, exclusion of non-English language citations)                                             | 26                  |
| 31                                      | Assessment of quality of included studies                                                                                 | 26                  |
| Reporting of conclusions should include |                                                                                                                           |                     |
| 32                                      | Consideration of alternative explanations for observed results                                                            | 10-14               |
| 33                                      | Generalization of the conclusions (ie, appropriate for the data presented and within the domain of the literature review) | 15                  |
| 34                                      | Guidelines for future research                                                                                            | 15                  |
| 35                                      | Disclosure of funding source                                                                                              | 16                  |

From: Stroup DF, Berlin JA, Morton SC, et al, for the Meta-analysis Of Observational Studies in Epidemiology (MOOSE) Group. Meta-analysis of Observational Studies in Epidemiology. A Proposal for Reporting. *JAMA*. 2000;283(15):2008-2012. doi: 10.1001/jama.283.15.2008.

Transcribed from the original paper within the NEUROSURGERY® Editorial Office, Atlanta, GA, United States. August 2012.
