# Supplementary material for: Prognostic significance of platelet-to-lymphocyte ratio (PLR) in patients with breast cancer treated with neoadjuvant chemotherapy: a meta-analysis
Source: PubMed Central journal article supplement — BMJ Open. 2023 Nov 23;13(11):e074874. doi: 10.1136/bmjopen-2023-074874 (PMC10668253; doi:10.1136/bmjopen-2023-074874), 2023-11-23
Supplement: bmjopen-2023-074874supp004.pdf [file bmjopen-2023-074874supp004.pdf]

**Table S1. Characteristics of included studies in meta-analysis.**

| NO. | Author     | Year | Country | Ethnicity | Study design  | Study period | Subtype   | Patients (n) | Median age (years) | Follow-up (month)  | Cut-off value | Method         | Outcomes   | NOS score |
|-----|------------|------|---------|-----------|---------------|--------------|-----------|--------------|--------------------|--------------------|---------------|----------------|------------|-----------|
| 1   | Asano      | 2016 | Japan   | Asian     | retrospective | 2007-2013    | All       | 177          | NA                 | 3.4 (0.6-6.0)      | 150           | Previous study | pCR/DFS    | 8         |
| 2   | Vincenzo   | 2018 | Italy   | Caucasian | retrospective | 1999-2018    | All       | 373          | 50 (26-82)         | NA                 | 104.47        | ROC            | pCR        | 6         |
| 3   | Losada     | 2018 | Spain   | Caucasian | retrospective | 2004-2018    | All       | 104          | 71 (65-89)         | 48 (6-149)         | 150           | Previous study | pCR/DFS    | 8         |
| 4   | Javier     | 2018 | America | Caucasian | retrospective | 2013-2016    | All       | 272          | 51 (27-85)         | NA                 | 150           | Previous study | pCR        | 6         |
| 5   | Peng       | 2019 | China   | Asian     | retrospective | 2013-2017    | All       | 808          | 50 (20-72)         | NA                 | 151.3         | ROC            | pCR+PR     | 6         |
| 6   | Ileana     | 2020 | France  | Caucasian | retrospective | 2005-2013    | All       | 206          | 50.3 (25.3-76.6)   | 80.4 (2.4-135.6)   | 150           | Previous study | pCR/OS/DFS | 8         |
| 7   | Tulay      | 2020 | Turkey  | Caucasian | retrospective | 2009-2018    | All       | 131          | 49 (23-74)         | NA                 | 119           | ROC            | pCR        | 6         |
| 8   | Hu         | 2020 | China   | Asian     | retrospective | 2012-2016    | Luminal B | 980          | NA                 | 37 (5-77)          | NA            | NA             | pCR/DFS    | 8         |
| 9   | Alan       | 2020 | Turkey  | Caucasian | retrospective | 2015-2017    | All       | 55           | 48.5 (27-80)       | 41 (15-49)         | 225.3         | ROC            | pCR        | 7         |
| 10  | Jiang      | 2020 | China   | Asian     | retrospective | 2014-2018    | All       | 249          | 51                 | 4-72               | 88.23         | ROC            | pCR/OS     | 8         |
| 11  | Christophe | 2021 | France  | Caucasian | retrospective | 1996-2016    | IBC       | 75           | NA                 | 124.8 (68.5-166.8) | 150           | Previous study | pCR/OS/DFS | 8         |
| 12  | Ahmet      | 2021 | Turkey  | Caucasian | retrospective | 2008-2019    | All       | 743          | 48 (22.0-83.5)     | 67.5 (10.5-194.4)  | 131.8         | ROC            | pCR        | 7         |
| 13  | Kübra      | 2021 | Turkey  | Caucasian | retrospective | 2016-2020    | All       | 150          | 45.6               | NA                 | 150           | Previous study | pCR        | 6         |
| 14  | Ma         | 2021 | China   | Asian     | retrospective | 2017-2018    | All       | 203          | NA                 | 31 (1-39)          | 135           | ROC            | pCR/DFS    | 8         |
| 15  | Ouissam    | 2021 | Morocco | Caucasian | retrospective | 2010-2014    | IBC       | 102          | 49 (29-88)         | NA                 | 178           | ROC            | pCR/OS/DFS | 7         |
| 16  | Cong       | 2022 | China   | Asian     | retrospective | 2012-2016    | All       | 280          | 49                 | NA                 | 155           | ROC            | pCR/OS     | 7         |
| 17  | Chung      | 2022 | China   | Asian     | retrospective | 2012-2019    | TNBC      | 88           | 51                 | NA                 | 148.14        | ROC            | pCR        | 6         |
| 18  | Jin        | 2022 | China   | Asian     | retrospective | 2014-2019    | All       | 67           | 51 (27-81)         | NA                 | 106.3         | ROC            | pCR        | 6         |
| 19  | Song       | 2022 | China   | Asian     | retrospective | 2016-2018    | All       | 144          | 50.4               | 32 (1-40)          | 158.365       | ROC            | DFS        | 8         |
| 20  | Lou        | 2022 | China   | Asian     | retrospective | 2015-2018    | TNBC      | 92           | 52.3 (29-67)       | NA                 | 141.36        | ROC            | pCR        | 6         |
| 21  | Yang       | 2022 | China   | Asian     | retrospective | 2020-2022    | All       | 95           | NA                 | NA                 | 118.78        | ROC            | pCR        | 6         |
| 22  | Acikgoz    | 2022 | Turkey  | Caucasian | retrospective | 2014-2019    | All       | 139          | 45 (25-75)         | 39.5 (7.5-93)      | 181.7         | ROC            | pCR        | 7         |

**Abbreviations:** NA: not available; OS: overall survival; DFS: disease-free survival; pCR: pathologic complete response; ROC: receiver operating characteristic curve; NOS: Newcastle-Ottawa Scale.
