# Supplementary material for: Prognostic significance of platelet-to-lymphocyte ratio (PLR) in patients with breast cancer treated with neoadjuvant chemotherapy: a meta-analysis
Source: PubMed Central journal article supplement — BMJ Open. 2023 Nov 23;13(11):e074874. doi: 10.1136/bmjopen-2023-074874 (PMC10668253; doi:10.1136/bmjopen-2023-074874), 2023-11-23
Supplement: bmjopen-2023-074874supp005.pdf [file bmjopen-2023-074874supp005.pdf]

**Table S2. Meta-analysis of the association between PLR and clinicopathological parameters of BC with NACT.**

| Variable                                        | No. of studies | No. of patients | Effects model | OR (95% CI)     | p      | Heterogeneity I <sup>2</sup> | P <sub>H</sub> |
|-------------------------------------------------|----------------|-----------------|---------------|-----------------|--------|------------------------------|----------------|
| Age (Yong vs. Old)                              | 9              | 3273            | Fixed         | 0.86(0.79-0.93) | <0.001 | 40.60%                       | 0.096          |
| Histologic type (Ductal vs. Others)             | 4              | 1520            | Fixed         | 0.97(0.94-1.01) | 0.147  | 7.20%                        | 0.357          |
| Grade (G1+G2 vs. G3+unknown)                    | 4              | 1692            | Fixed         | 0.96(0.91-1.02) | 0.203  | 0.00%                        | 0.439          |
| T stage (T1–T2 vs. T3–T4)                       | 6              | 2178            | Random        | 1.05(1.00-1.11) | 0.035  | 70.30%                       | 0.005          |
| Lymph node metastasis (No vs. Yes)              | 5              | 2341            | Fixed         | 0.97(0.88-1.06) | 0.440  | 0.00%                        | 0.952          |
| ki-67 (<14 vs. ≥14)                             | 7              | 2783            | Fixed         | 0.99(0.90-1.09) | 0.771  | 0.00%                        | 0.458          |
| Hormone Receptor (– vs. +)                      | 6              | 2049            | Fixed         | 0.94(0.84-1.06) | 0.309  | 0.00%                        | 0.526          |
| HER-2 (– vs. +)                                 | 7              | 2023            | Random        | 0.91(0.76-1.09) | 0.293  | 69.20%                       | 0.003          |
| Molecular subtype (Luminal vs. TriNeg + HER-2+) | 8              | 2143            | Fixed         | 0.99(0.92-1.07) | 0.845  | 15.20%                       | 0.310          |
| Menopausal status (Pre vs. Post)                | 5              | 1604            | Fixed         | 0.83(0.76-0.90) | <0.001 | 50.80%                       | 0.087          |

Abbreviations: OR: odds ratio; 95% CI: 95% confidence interval; P<sub>H</sub>: p values of Q test for heterogeneity test.
