# Supplementary figures and images for: Prognostic significance of platelet-to-lymphocyte ratio (PLR) in patients with breast cancer treated with neoadjuvant chemotherapy: a meta-analysis
Source: PubMed Central journal article supplement — BMJ Open. 2023 Nov 23;13(11):e074874. doi: 10.1136/bmjopen-2023-074874 (PMC10668253; doi:10.1136/bmjopen-2023-074874), 2023-11-23

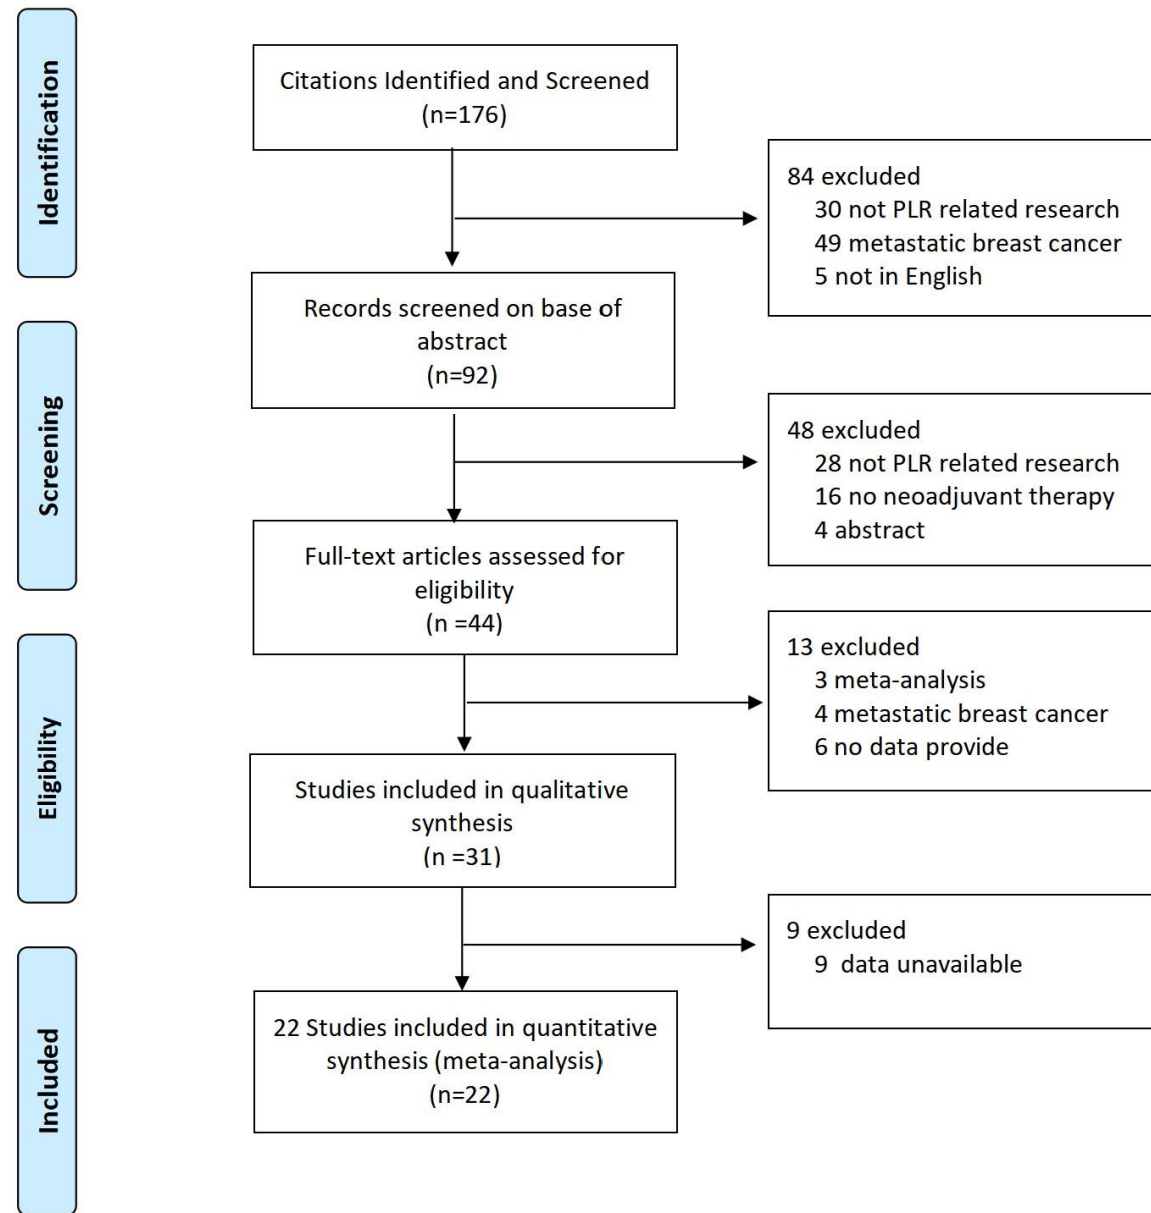

Supplement: bmjopen-2023-074874supp001.pdf [file bmjopen-2023-074874supp001.pdf]

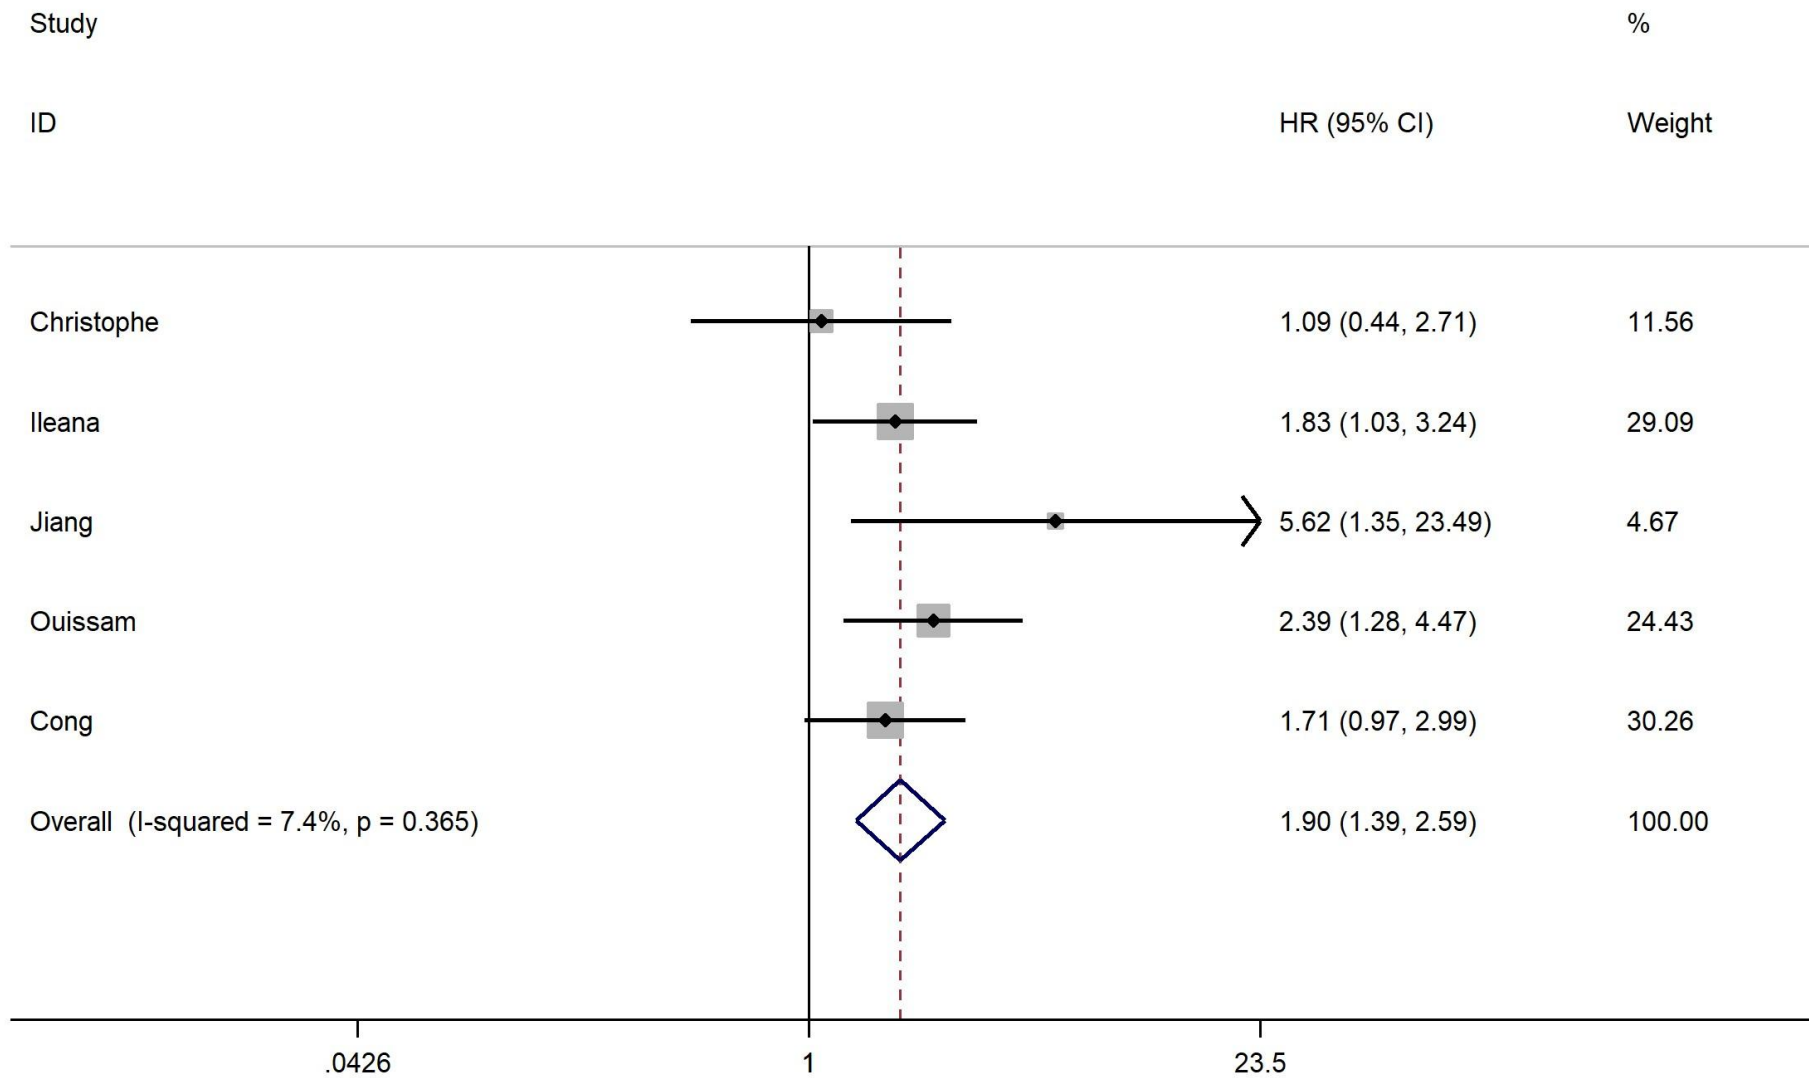

Supplement: bmjopen-2023-074874supp002.pdf [file bmjopen-2023-074874supp002.pdf]

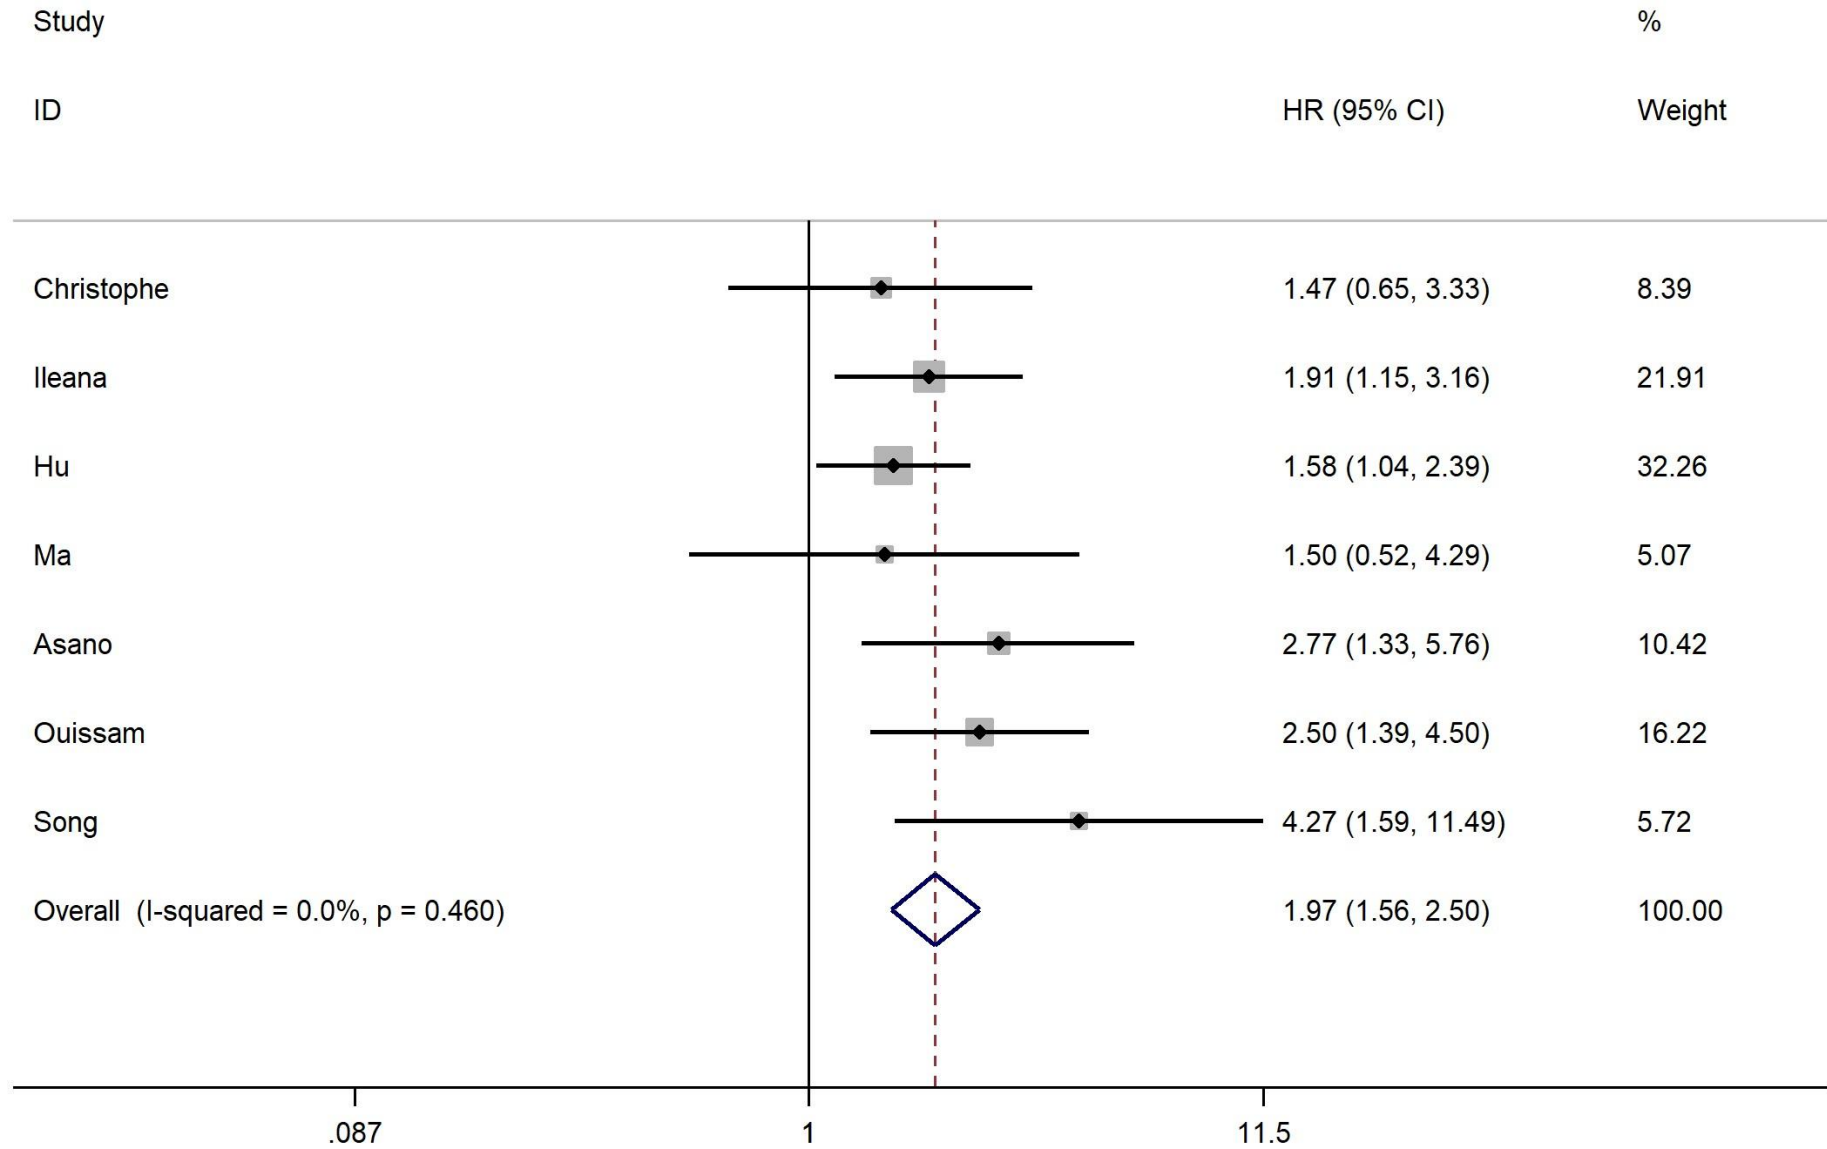

Supplement: bmjopen-2023-074874supp003.pdf [file bmjopen-2023-074874supp003.pdf]
